# Supplementary material for: A transformative translational change programme to introduce genomics into healthcare: a complexity and implementation science study protocol
Source: PubMed Central journal article supplement — BMJ Open. 2019 Mar 5;9(3):e024681. doi: 10.1136/bmjopen-2018-024681 (PMC6429849; doi:10.1136/bmjopen-2018-024681), 2019-03-05
Supplement: bmjopen-2018-024681.draft_revisions.pdf [file bmjopen-2018-024681.draft_revisions.pdf]

# BMJ Open

BMJ Open is committed to open peer review. As part of this commitment we make the peer review history of every article we publish publicly available.

When an article is published we post the peer reviewers' comments and the authors' responses online. We also post the versions of the paper that were used during peer review. These are the versions that the peer review comments apply to.

The versions of the paper that follow are the versions that were submitted during the peer review process. They are not the versions of record or the final published versions. They should not be cited or distributed as the published version of this manuscript.

BMJ Open is an open access journal and the full, final, typeset and author-corrected version of record of the manuscript is available on our site with no access controls, subscription charges or pay-per-view fees (<http://bmjopen.bmj.com>).

If you have any questions on BMJ Open's open peer review process please email [info.bmjopen@bmj.com](mailto:info.bmjopen@bmj.com)

# BMJ Open

## A transformative translational change programme to introduce genomics into healthcare: a complexity and implementation science study protocol

|                               |                                                                                                                                                                                                                                                                                                                                                                                                                                                                                                                                                                                                                                                                                                                                                                                                                                                                                                                                                                                                                                                                                                   |
|-------------------------------|---------------------------------------------------------------------------------------------------------------------------------------------------------------------------------------------------------------------------------------------------------------------------------------------------------------------------------------------------------------------------------------------------------------------------------------------------------------------------------------------------------------------------------------------------------------------------------------------------------------------------------------------------------------------------------------------------------------------------------------------------------------------------------------------------------------------------------------------------------------------------------------------------------------------------------------------------------------------------------------------------------------------------------------------------------------------------------------------------|
| Journal:                      | <i>BMJ Open</i>                                                                                                                                                                                                                                                                                                                                                                                                                                                                                                                                                                                                                                                                                                                                                                                                                                                                                                                                                                                                                                                                                   |
| Manuscript ID                 | bmjopen-2018-024681                                                                                                                                                                                                                                                                                                                                                                                                                                                                                                                                                                                                                                                                                                                                                                                                                                                                                                                                                                                                                                                                               |
| Article Type:                 | Protocol                                                                                                                                                                                                                                                                                                                                                                                                                                                                                                                                                                                                                                                                                                                                                                                                                                                                                                                                                                                                                                                                                          |
| Date Submitted by the Author: | 13-Jun-2018                                                                                                                                                                                                                                                                                                                                                                                                                                                                                                                                                                                                                                                                                                                                                                                                                                                                                                                                                                                                                                                                                       |
| Complete List of Authors:     | Taylor, Natalie; Cancer Council, Cancer Research Division Best , Stephanie ; Australian Institute of Health Innovation, Centre for Healthcare Resilience and Implementation Science; Murdoch Childrens Research Institute, Australian Genomics<br>Marty , Melissa ; Walter and Eliza Hall Institute of Medical Research, Melbourne Genomics Health Alliance ; Royal Children's Hospital Melbourne, Murdoch Children's Research Institute<br>Long , Janet; Australian Institute of Health Innovation, Centre for Healthcare Resilience and Implementation Science<br>North, Kathryn; Murdoch Childrens Research Institute, Australian Genomics ; Royal Children's Hospital Melbourne, Murdoch Children's Research Institute<br>Braithwaite, Jeffrey; Australian Institute of Health Innovation, Centre for Healthcare Resilience and Implementation Science ; Murdoch Childrens Research Institute, Australian Genomics<br>Gaff , Clara; Walter and Eliza Hall Institute of Medical Research, Melbourne Genomics Health Alliance ; University of Melbourne, Department of Paediatrics and Medicine |
| Keywords:                     | Genomics, complexity, implementation, behaviour change, sustainability, translation                                                                                                                                                                                                                                                                                                                                                                                                                                                                                                                                                                                                                                                                                                                                                                                                                                                                                                                                                                                                               |
|                               |                                                                                                                                                                                                                                                                                                                                                                                                                                                                                                                                                                                                                                                                                                                                                                                                                                                                                                                                                                                                                                                                                                   |

SCHOLARONE™  
Manuscripts

1  
2  
3 **1 A transformative translational change programme to introduce genomics into**  
4 **2 healthcare: a complexity and implementation science study protocol**  
5  
6  
7  
8

9 Authors:

10  
11 Natalie Taylor<sup>\*,a</sup> – [natalie.taylor@nswcc.org.au](mailto:natalie.taylor@nswcc.org.au); (T: +61 2 9334 1974)  
12

13 Stephanie Best<sup>c,d</sup> – [Stephanie.best@mq.edu.au](mailto:Stephanie.best@mq.edu.au)  
14

15 Melissa Martyn<sup>b,e,f</sup> – [melissa.martyn@melbournegenomics.org.au](mailto:melissa.martyn@melbournegenomics.org.au)  
16

17 Janet C Long<sup>c</sup> – [janet.long@mq.edu.au](mailto:janet.long@mq.edu.au)  
18

19 Kathryn North<sup>e,d</sup> - [kathryn.north@mcri.edu.au](mailto:kathryn.north@mcri.edu.au)  
20

21  
22 Jeffrey Braithwaite<sup>c,d</sup> – [jeffrey.braithwaite@mq.edu.au](mailto:jeffrey.braithwaite@mq.edu.au)  
23

24 Clara Gaff<sup>b,f</sup> – [clara.gaff@melbournegenomics.org.au](mailto:clara.gaff@melbournegenomics.org.au)  
25  
26  
27

28 \* *Corresponding author*  
29

30 <sup>a</sup> *Cancer Council New South Wales, 153 Dowling Street, Woolloomooloo, New South Wales*  
31  
32 *2011, Australia*  
33

34 <sup>b</sup> *Melbourne Genomics Health Alliance, Walter and Eliza Hall Institute, Parkville, Australia*  
35  
36

37 <sup>c</sup> *Centre for Healthcare Resilience and Implementation Science, Australian Institute of*  
38  
39 *Health Innovation, Macquarie University, Sydney, Australia*  
40

41 <sup>d</sup> *Australian Genomics, Murdoch Children's Research Institute, Parkville, Australia*  
42

43 <sup>e</sup> *Murdoch Children's Research Institute, The Royal Children's Hospital, Parkville, Australia*  
44

45 <sup>f</sup> *Departments of Paediatrics and Medicine, University of Melbourne, Melbourne, Australia*  
46  
47  
48  
49

50 **Word count: 5194**  
51  
52  
53

54 **ABSTRACT**  
55

1  
2  
3 1 **Introduction:** Translating scientific advances in genomic medicine into evidence-based  
4  
5 2 clinical practice is challenging. It is essential to study the natural translation of genomics into  
6  
7 3 ‘early-adopting’ health system sectors, such as the Australian and Melbourne Genomics  
8  
9 4 Health Alliances. We outline a novel methodological approach, taking a complexity science  
10  
11 5 perspective, using implementation-effectiveness, translation, and behaviour change  
12  
13 6 frameworks for a) examining 29 health systems (Australian and Melbourne Genomics Health  
14  
15 7 Alliance Flagships) integrating genomics into practice, and b) combining this learning to co-  
16  
17 8 design and test an evidence-based generalisable toolkit for translating genomics into  
18  
19 9 Australian healthcare.

20  
21  
22 10 **Methods and analysis:** 29 Flagships integrating genomics into clinical settings are studied as  
23  
24 11 individual complex adaptive systems (CASs) to understand emergent and self-organising  
25  
26 12 behaviours amongst interrelated actors and processes. The Effectiveness-Implementation  
27  
28 13 Hybrid approach is applied to gather information, alongside extended comparative-  
29  
30 14 effectiveness tests of genomics, on the delivery and potential for real-world implementation  
31  
32 15 of genomics. Study stages ‘1’ and ‘2a’ represent Hybrid Model 1 and are the focus of this  
33  
34 16 protocol. Nested within Hybrid Model 1 and applied across both stages, the Translation  
35  
36 17 Science to Population Impact (TScImpact) framework is used to study policy decisions and  
37  
38 18 service provision. The Theoretical Domains Framework (TDF) is used to understand  
39  
40 19 individual level behaviour change.

41  
42  
43  
44 20 Stage 1 synthesises interview data from 32 participants involved in developing the  
45  
46 21 genomics clinical practice systems and approaches across five ‘demonstration-phase’ (early  
47  
48 22 adopter) Flagships. In Stage 2a, service provision, policy, and clinical stakeholders are  
49  
50 23 providing quantitative and qualitative data on process mapping, clinical audits, uptake and  
51  
52 24 sustainability (TScImpact), and psychosocial and environmental determinants of change  
53  
54 25 (TDF). Findings will be synthesised before co-designing a foundation intervention toolkit to

1 facilitate implementation of genomic testing. Study methods to test the implementation  
2 toolkit effectiveness are summarised.

3 **Ethics and dissemination:** Ethical approval has been granted. The results will be  
4 disseminated in traditional academic forums and will be used to refine interventions to  
5 translate genomics evidence into healthcare practice.

6  
7 **Key words:** Genomics, complex adaptive systems, evidence based implementation, natural  
8 experiment, behaviour change, policy, sustainability, translation

## 9 10 **Strengths and limitations of this study**

11 Strengths and limitations of this study include:

- 12 • A naturalistic study of complex change for the application of genomics into the health  
13 system
- 14 • A novel methodological approach to the study of complexity that could be applied more  
15 widely
- 16 • An approach to understanding reality and how to generate the ideal for implementation
- 17 • A demonstration of how complexity principles can be incorporated into the application of  
18 behaviour change theory
- 19 • A challenging undertaking to consolidate multiple components of complexity into a  
20 generalisable implementation package

## 21 22 **INTRODUCTION**

23 Since the birth of the genomic era almost 15 years ago,<sup>1</sup> substantial efforts have focussed on  
24 developing laboratory based genomic sequencing capabilities and large scale sequencing  
25 studies to understand the significance of sequence variation on health. In recent years there  
26 has been an increasing focus on the application of this information in health care, for example

1  
2  
3 1 to improve the diagnosis and/or treatment of disease. The speed of scientific advances,  
4  
5 2 however, has exceeded the ability of health systems to establish what the ideal conditions,  
6  
7 3 systems, and behaviours ought to be for using genomics in complex healthcare settings.  
8  
9 4 Rather, iterative attempts to apply genomics within existing (often pre-genomics) clinical  
10  
11 5 practice, generate emergent routines with varying levels of suitability, efficiency and  
12  
13 6 sustainability. This *'real'* state of affairs is influencing the implementation of genomics into  
14  
15 7 routine care in the absence of evidence based, *'ideal'* approaches. A lack of implementation  
16  
17 8 science evidence is one of a long list of well documented challenges limiting the effective  
18  
19 9 implementation of genomic research into complex healthcare systems.<sup>2</sup> A 2017 review  
20  
21 10 highlighted the lag in evidence to support implementation, demonstrating that very few  
22  
23 11 studies to date have: a) incorporated implementation science theoretical frameworks,  
24  
25 12 sustainability measures, or capacity building, b) focussed on macro-level factors (e.g., health  
26  
27 13 systems, policies, financing), and c) attempted to develop and evaluate evidence based  
28  
29 14 strategies for enhancing the implementation of genomic medicine.<sup>3</sup>  
30  
31  
32

33 15 The continuous adhoc, emergent and self organised translation modes manifesting  
34  
35 16 within complex health care systems, as they attempt to keep pace with the constant stream of  
36  
37 17 new genomic evidence, undoubtedly contribute to the challenges faced in designing protocols  
38  
39 18 to study and test approaches to implementation. Disentangling the way in which the actors in  
40  
41 19 the system (e.g., clinicians, patients, researchers, policymakers, planners and decision  
42  
43 20 makers) perceive, experience, and *naturally behave* under these real world complex  
44  
45 21 conditions is crucial for understanding the true adoption, impact, and likely sustainability of  
46  
47 22 genomic testing. It is also key to discovering the *'ideal'* and to designing real-world  
48  
49 23 interventions to support the implementation of long-term, cost-effective genomics policy and  
50  
51 24 practice. In this paper, we outline a novel methodological approach, using complexity  
52  
53 25 science, translation, and behaviour change frameworks, to study the integration of genomics  
54  
55  
56  
57  
58  
59  
60

1  
2  
3 1 into clinical practice as part of a national natural experiment, and develop a generalisable,  
4  
5 2 evidence based package for implementation.  
6

7 3 The Australian Genomics Health Alliance (Australian Genomics) is a national  
8  
9 4 network of state-based genomics initiatives, working together to translate genomic  
10  
11 5 approaches into clinical practice. In 2014, the Melbourne Genomics Health Alliance  
12  
13 6 (Melbourne Genomics) commenced a demonstration project, which laid the foundations for  
14  
15 7 Australian Genomics, was awarded \$25M over five years (2016-2020). Together these  
16  
17 8 Alliances have placed emphasis on understanding, from a service level and clinical practice  
18  
19 9 perspective, how genomic sequencing can be implemented in health care. Their Flagship  
20  
21 10 programs are central to achieving these insights. A Flagship is a multidisciplinary clinical  
22  
23 11 group (e.g., medical professionals, diagnostic laboratory staff, genetics counsellors, etc.)  
24  
25 12 working together, often across multiple hospital sites, to provide genomic sequencing for  
26  
27 13 defined clinical indications according to a broad framework.<sup>4</sup> From the inception of the  
28  
29 14 demonstration project in 2014 through to 2020, 29 Flagships will be evaluating the use of  
30  
31 15 genomics in clinical practice, across diverse clinical conditions (Figure 1), involving  
32  
33 16 specialists from at least 16 different health professional disciplines from up to 18 hospitals  
34  
35 17 and 4 hospital laboratories across Australia. The first five Melbourne Genomics flagships  
36  
37 18 have already undergone a formal evaluation to assess the effectiveness of genomic  
38  
39 19 sequencing for the purposes of early detection, treatment and, where possible, prevention of  
40  
41 20 major disease.<sup>5-7</sup>  
42  
43  
44  
45

46 21 There is an immediate need to understand the emergent service provision pathways  
47  
48 22 and clinical processes for genomic sequencing to ensure that its impact in widespread  
49  
50 23 practice lives up to the promise of the results of the Flagships<sup>7 8</sup> established under the  
51  
52 24 auspices of a research program. The Flagships exemplify a large scale attempt to integrate  
53  
54 25 genomics into everyday healthcare. Therefore, in addition to establishing the clinical validity  
55

1 and utility of genomics, Flagships are perfectly positioned for a naturalistic experiment of the  
2 factors affecting the successful implementation of genomics into the Australian healthcare  
3 system, and for testing the impact of evidence based approaches to ensure sustained, effective  
4 use. Each Flagship represents a complex adaptive system (CAS);<sup>9-11</sup> there are a number of  
5 complex features (e.g., emergent behaviours, self-organisation, non-linear processes, co-  
6 evolution, behaviours at the edge of chaos, nested systems, interconnectivity and networks,  
7 and simple rules which beget complex behaviours)<sup>12-15</sup> within each of the participating  
8 Flagships, and interactions between their component parts. As such, this research will use a  
9 complexity science lens, combined with implementation science and behavioural approaches,  
10 to investigate and support the integration of genomics into the health system. Whilst the  
11 Flagships are distinguishable in form, with unique structural and cultural characteristics, each  
12 has been established with a common underpinning framework (Australian and Melbourne  
13 Genomics). Therefore, studying all 29 Flagships using a common approach is invaluable, as  
14 this permits evidence based examination of their functioning and outcomes.<sup>16</sup> It also provides  
15 insights into improvements in processes and procedures over time, and enables comparison  
16 and, where appropriate, consolidation of findings across Flagships. Uniquely, then, we are  
17 able to study each individual Flagship as a CAS and also identify commonalities across them  
18 to produce generalisable knowledge to support the translation of genomics evidence into  
19 practice.

20       There are three broad and interacting elements of complexity within a Flagship, or  
21 CAS, model (Figure 2). First, '*clinical versus implementation effectiveness*': whilst  
22 attempting to test the effectiveness of genomics in the clinical setting, the impact of the  
23 broader health system (e.g., behaviours, resources, logistics, politics, etc.) can often distort  
24 what we come to understand about the success of diagnostic testing and subsequent treatment  
25 decisions.<sup>17-19</sup> Determining, through rigorous research designs, how best to work with these



1 health system factors to implement testing and treatment effectively is crucial.<sup>20</sup> Second,  
2 ‘*policy decisions and service provision*’: for the sustained and evidence-based use of  
3 clinically effective genomics, it is important to identify which of the key resources needed for  
4 sound genomics practice are being funded through the Melbourne Genomics/Australian  
5 Genomics program, and plan for the commissioning of these resources once programmatic  
6 funding has ended. Furthermore, organisational, local area, and national level policy  
7 decisions (relating to, for example, Medicare funding, resourcing, management, de-  
8 implementation, etc.), are likely to be affected if genomic practice is endorsed. Therefore,  
9 understanding and planning for the management of such changes will be key for successful  
10 long-term implementation.<sup>4</sup> Third, ‘*individual level behaviour change*’: the implementation  
11 of genomics into clinical practice will inevitably require both clinical and administrative  
12 practice change.<sup>21</sup>

13         Sitting both within and across each of these three broad elements of complexity are  
14 key complexity principles, which include, behaviours at the edge of chaos (high variety and  
15 creativity; the boundary between chaos and order), self-organisation (constant reorganisation  
16 of hierarchies and behaviours to adapt to the environment), and emergence (random actions  
17 that eventually generate patterns which change behaviour and the system). Studying the  
18 emergent and self-organising behaviours within different Flagships throughout the  
19 continuous flux will be vital for both identifying which of these behaviours to embed,<sup>22</sup> and  
20 where support through evidence based implementation can be beneficial.<sup>14</sup> Furthermore,  
21 whilst we cannot study the elements and principles of complexity in isolation, using  
22 appropriate frameworks to understand them, and synthesising this information in a way that  
23 helps to understand both successful emergent behaviours and gaps in practice, is likely to  
24 facilitate more effective intervention development.<sup>23</sup>

1  
2  
3 1 To address the first element of complexity (*clinical versus implementation*  
4  
5 2 *effectiveness*) the Effectiveness-Implementation Hybrid approach – a way of blending design  
6  
7 3 components of clinical effectiveness and implementation research,<sup>20</sup> will be applied to the  
8  
9 4 Flagships across the five year research program (see Figure 1). To summarise, first (the focus  
10  
11 5 of this protocol) we will test a clinical intervention (in our case ‘genomic sequencing’) whilst  
12  
13 6 gathering information on its delivery during the effectiveness trial and/or on its potential for  
14  
15 7 implementation in a real world setting (Hybrid model 1); second we will test a clinical  
16  
17 8 intervention and an implementation/intervention strategy simultaneously (Hybrid model 2);  
18  
19 9 and finally an implementation /intervention strategy will be tested while observing/gathering  
20  
21 10 information on the clinical intervention and related outcomes (Hybrid model 3).

22  
23  
24 11 Nested within the Hybrid Model 1 approach, the Translation Science to Population  
25  
26 12 Impact (TSci Impact)<sup>24</sup> framework will be used to study the second element of complexity  
27  
28 13 (*policy decisions and service provision*), and the Theoretical Domains Framework (TDF)<sup>25-31</sup>  
29  
30 14 will be used to study the third (*individual level behaviour change*). The TSci Impact  
31  
32 15 framework provides a systematic approach to investigate the complex processes and  
33  
34 16 mechanisms through which tested and proven interventions are integrated into practice and  
35  
36 17 policy in a large scale and sustainable way. This framework was designed with complexity  
37  
38 18 (or ‘systems’) science in mind,<sup>32-35</sup> to take into account the complex interrelationships  
39  
40 19 between infrastructure and contextual influences within and across translation phases, and  
41  
42 20 promotes the study of complex interactions within and across implementation systems. The  
43  
44 21 TSci Impact framework favours and facilitates the synthesis of information to understand  
45  
46 22 clinical trial outcomes within organisational settings, combined with community action  
47  
48 23 research for rich accounts of how culture, context, local decision making and history  
49  
50 24 influence implementation of evidence based practice.<sup>24</sup>  
51  
52  
53  
54  
55  
56  
57  
58  
59  
60

1  
2  
3 1 The TDF is a psychosocial and environmental framework of behaviour change that  
4  
5 2 enables reliable and valid identification of psychosocial and environmental barriers and  
6  
7 3 facilitators (e.g., motivation, emotions, resources, social influences) to practice change. A key  
8  
9 4 feature of the TDF includes the need to establish key target behaviours, and so as part of this  
10  
11 5 work and aligning with ideas drawn from complexity science, we will incorporate the  
12  
13 6 development of clinical process maps to understand the emergent, self-organising, and  
14  
15 7 networking behaviours within and between individuals in the system, and to establish the  
16  
17 8 *ideal from the reality*<sup>36 37</sup> as these Flagships initiate the foundations of genomics in their local  
18  
19 9 setting. In addition, investigating facilitators of behaviour change (or intuitively derived  
20  
21 10 interventions<sup>38</sup>) allows for the naturalistic assessment of emergent and self-organised  
22  
23 11 behaviours central to complexity theory. Finally, the TDF has previously been successfully  
24  
25 12 used to synthesise determinants of behaviour and interventions collected using no prior  
26  
27 13 framework, or alternative frameworks.(e.g.,<sup>39 40 41</sup>) By studying Flagships as CASs, this work  
28  
29 14 aims to identify common features of these systems and networks. As such, this is an  
30  
31 15 unrivalled opportunity to use the TDF to synthesise the complexity across and within  
32  
33 16 Flagships into a holistic intervention package, combining knowledge of successful emergent  
34  
35 17 behaviours with strategies to address genomics implementation problems in a targeted,  
36  
37 18 standardised, and generalisable fashion.  
38  
39  
40  
41  
42  
43

19

## 20 **Aim and objectives**

21 This paper provides an outline of a five year transformative translational change program,  
22 and specific details for the initial two-year phase, to study and support the implementation of  
23 genomic testing into routine healthcare in clinical, organisational and policy contexts across  
24 Australia. The objectives of the first phase are to study Melbourne Genomics and Australian  
25 Genomics Flagships to:

- 1) Understand the emergent and self-organising behaviours during the implementation of genomics into practice
- 2) Identify successful emergent behaviours and gaps in practice
- 3) Synthesise this information using a theoretical framework
- 4) Co-design, with clinicians, a foundation intervention package to facilitate the implementation of genomic testing into clinical practice

## METHODS AND ANALYSIS

### Context: Flagships

Under the Melbourne Genomics and Australian Genomics program of research, each of the 29 Flagships represents a test of the integration of genomics into the clinical setting in parallel with usual (non-research funded) care, incorporating research consent processes into care processes delivered by genetic counsellors. Given this is a test of diagnostic capability, as opposed to a treatment intervention, it is possible to administer both usual investigations and the new investigation (genomic sequencing) to the same patient. Both the yield of the test and the clinical decisions resulting can be determined.<sup>42</sup> As such, as opposed to a randomised controlled trial, which is both unnecessary and inequitable under the given circumstances, each flagship is incorporating an extended version of a comparative effectiveness research (CER) design,<sup>43 44</sup> which adds the assessment of clinical and patient utility to the standard CER health outcome measure.

The interrelated actors and processes manifesting as part of each Flagship represent a CAS, as demonstrated by generic Flagship context examples of key CAS components in Table 1. Flagships will, therefore, be studied as an individual CAS to understand the emergent and self-organising behaviours. In addition, commonalities of integration across

- 1 CASs will be studied to support the development of an implementation framework for future  
 2 real world healthcare organisations planning to translate genomics into practice.

3 **Table 1. Flagships as CAS**

| CAS component                                                              | Flagship example                                                                                                                                                                                                                                                                                                                                                                                                                                                                                                                                                                                                                                                                         |
|----------------------------------------------------------------------------|------------------------------------------------------------------------------------------------------------------------------------------------------------------------------------------------------------------------------------------------------------------------------------------------------------------------------------------------------------------------------------------------------------------------------------------------------------------------------------------------------------------------------------------------------------------------------------------------------------------------------------------------------------------------------------------|
| A large number of elements which interact dynamically                      | Key Flagship elements include patients (and their own influences outside the official health care system), staff (different professions, different hierarchies, different approaches to decision making), locations (multiple sites and also labs and clinicians not colocated), resources (time, money etc), organisations, leadership, clinical processes, research processes – all of which will interact                                                                                                                                                                                                                                                                             |
| Any element in the system is affected by and affects several other systems | For example, the flagship is operating within the broader health system CAS incorporating new genomic investigations and procedures within existing patient care pathways and evaluating the process and outcomes. This involves an iterative process affected by and affecting pre-existing clinical and laboratory systems for patient assessment, decision making and patient consent for the genetic diagnostic process, sign off, counselling, sampling, transit, batching, sequencing, computational access, analysis, interpretation, reporting, etc. Different professions interact throughout this process to make a final decision                                             |
| Non linear interactions, so small changes can have large effects           | Whilst the necessary steps must be taken to start and complete the process to finalise and communicate any given genetic diagnosis, the interactions within and between each stage are non-linear and iterative. Furthermore, the exploratory nature of Flagships under a research program introduces further ambiguity.                                                                                                                                                                                                                                                                                                                                                                 |
| Openness, so it may be difficult to define system boundaries               | <p>As a broad example, the funding of resources for genomic sequencing within the participating health services overlaps with existing government commissioned resources for a Flagship. As a research program operating in a real-world health system, this scenario may affect clinical decision making for patients due to boundaries within which clinicians must operate stipulated in research protocols</p> <p>A more specific example includes the uncertainty held regarding whether or not and when to communicate incidental findings to patients, and the ethical decision making behind undertaking secondary analysis of previously collected samples as new genes are</p> |

|                                                                                                                                        |                                                                                                                                                                                                                                                                                                                                                                                                                                                                                                                                            |
|----------------------------------------------------------------------------------------------------------------------------------------|--------------------------------------------------------------------------------------------------------------------------------------------------------------------------------------------------------------------------------------------------------------------------------------------------------------------------------------------------------------------------------------------------------------------------------------------------------------------------------------------------------------------------------------------|
|                                                                                                                                        | <p>discovered</p> <p>Whilst new knowledge for patient diagnosis and treatment is a clear benefit from the continuously evolving basic and clinical research perspective, impact on practice can involve period of time where there is more ambiguity and uncertainty about what is best for patients. Policies help to define this but generate boundaries, which can be frustrating, particularly if they are not up to date with new evidence. This can be where deviations can arise and new, informal, unrecorded patterns emerge.</p> |
| A constant flow of energy to maintain the organisation of the system                                                                   | Flagships require all those involved in completing the diagnostic process to be on board, but as with any health system, perceptions of value of different parts of the process, including the outcome, can vary and evolve amongst both patients and professionals. This affects the willingness to participate and the flow of energy in the system                                                                                                                                                                                      |
| A history whereby the past helps to shape present behaviour                                                                            | The involvement of genetics – and genetic specialists – in patient care differs across Flagships. The extent of this past involvement and the nature of the relationships between disciplines and different locations influences the introduction of genomics, specifically the protocols and procedures, as well as dynamics within a Flagship.                                                                                                                                                                                           |
| Elements in the system are not aware of the behaviour of the system as a whole and respond only to what is available or known locally. | For example, Flagships are operating as externally funded entities within the existing health care system – individuals are well aware of the need for funding but not so much the need to disinvest; they are also primarily concerned with the operations and need of their own Flagship(s), whilst there are other Flagships as well as the health system as a whole, which have different circumstances, and are having an impact/being impacted upon                                                                                  |

1

## 2 **Research design**

3 As part of the five year complexity-implementation science research plan, our design  
 4 provides methodological details for the two stages used to investigate Hybrid Model 1:  
 5 gathering information during the effectiveness trial (in this case an extended CER) of a  
 6 clinical intervention on its potential for implementation in a real world situation. Stage 1, a  
 7 data recoding exercise, has been completed and stage 2a is underway, collecting data across

1  
2  
3 1 at least a further 6 project areas Flagships (see Figure 1). A summary of methods to be  
4  
5 2 applied for the Hybrid Model 2 and 3 are also provided. A Logic Model (Figure 3) presents  
6  
7 3 the activities, outputs, and outcomes of Stage 1 and 2a. The Standards for Reporting  
8  
9 4 Implementation Studies (StaRI) Checklist<sup>45</sup> will be used to support the planning and  
10  
11 5 reporting of intervention strategies and implementation effectiveness.  
12

13  
14 6 Participant identification and data analysis will involve an expert resource group for  
15  
16 7 interpretation and clarification of findings, consisting of experienced clinicians and  
17  
18 8 researchers, each bringing academic and/or contextual knowledge from participating sites.  
19  
20 9 The following section contains details of participants and recruitment, data collection tools,  
21  
22 10 research procedures and data analysis plan for stage 1 (post flagship implementation) and  
23  
24 11 stage 2a (pre, during and post flagship implementation).  
25  
26  
27  
28

### 29 13 Stage 1: Hybrid Model 1; post-implementation

#### 30 31 14 *Stage 1 Participants and recruitment*

32  
33 15 Stage 1 builds on the work of the Melbourne Genomics evaluation team interviewing 32  
34  
35 16 clinicians across five Flagships in the demonstration phase. Individuals who were involved in  
36  
37 17 developing the systems and approaches [e.g., variant curation pipeline, variant classification  
38  
39 18 frameworks, consent forms and reporting templates for Whole Exome Sequencing (WES)  
40  
41 19 etc.], including genetic clinical specialists, and non genetic clinical specialists who attended  
42  
43 20 more than two multidisciplinary meetings over the demonstration phase, were invited to  
44  
45 21 participate via email.  
46  
47  
48  
49

#### 50 51 23 *Stage 1 Data collection tools*

52  
53 24 ***Structured interview schedule (Supplementary file 1):*** The schedule was used to gather data  
54  
55 25 retrospectively for the Melbourne Genomics evaluation from stakeholders in the

1 demonstration phase. Questions focussed on aspects of the first implementation of WES into  
 2 clinical practice: a) role in the project, b) experience (as a clinician or medical scientist), c)  
 3 perceptions of multi-disciplinary variant meetings, d) views on policy decisions and  
 4 procedures e) impact on their understanding, and f) factors affecting integration into practice.  
 5 Probes for questions in each topic area are also provided for interviewers to maximise the  
 6 quality of information gathered.

7 **Evidence based interview coding tools:** Whilst the data from these interviews was originally  
 8 used to obtain insights into the ‘what’ of the flagship, additional tools have been selected to  
 9 code these interviews from an evidence based, behavioural perspective. More specifically,  
 10 TDF coding and behaviour change techniques guidance,<sup>25-27</sup> and agreed definitions of the  
 11 TDF in the genomic context (see Table 2)<sup>46</sup> was used to: 1) identify behavioural areas for  
 12 change, 2) group key barriers and enablers to implementation of genomic sequencing  
 13 according to theoretical domains of behaviour change, to 3) capture any behaviour change  
 14 techniques (BCTs)<sup>26</sup> represented in any existing or new intuitive intervention strategies  
 15 described by participants.

16 **Table 2: Recoding Guide**

| TDF domain                     | TDF domain definition (Cane et al. 2012)                              | Definition in context                                                                                                                                                                                                                                |
|--------------------------------|-----------------------------------------------------------------------|------------------------------------------------------------------------------------------------------------------------------------------------------------------------------------------------------------------------------------------------------|
| Knowledge                      | An awareness of the existence of something                            | Clinicians’ actual awareness and understanding (through education/training) of the principles and process of offering genetic testing in clinical practice                                                                                           |
| Skills                         | An ability or proficiency acquired through practice                   | Clinicians’ actual physical and psychological ability or proficiency acquired through actual practice (as opposed to education/training – cannot get skills through education) to make decisions whether or not to offer genetic testing in practice |
| Memory, Attention and Decision | The ability to retain information focus selectively on aspects of the | Clinicians’ ability to remember to consider genetic testing alongside other interventions                                                                                                                                                            |



|                                       |                                                                                                                                                                                       |                                                                                                                                                                                                                                                                                 |
|---------------------------------------|---------------------------------------------------------------------------------------------------------------------------------------------------------------------------------------|---------------------------------------------------------------------------------------------------------------------------------------------------------------------------------------------------------------------------------------------------------------------------------|
| Processes                             | environment and choose between two or more alternatives                                                                                                                               | for health risk identification, diagnosis, management, and therapy                                                                                                                                                                                                              |
| Behavioural Regulation                | Anything aimed at managing or changing objectively observed or measured actions                                                                                                       | Clinicians' self-created or self-imposed regulation to help make decisions about offering genetic tests                                                                                                                                                                         |
| Social Influences                     | Those interpersonal processes that can cause individuals to change their thoughts, feelings, or behaviours                                                                            | Interpersonal interactions between professionals that can influence clinicians' thoughts, feelings or behaviours (ie anything in Motivation) regarding offering genetic testing                                                                                                 |
| Environmental Context and Resources   | Any circumstance of a person's situation or environment that discourages or encourages the development of skills and abilities independence, social competence and adaptive behaviour | Any external circumstance of a clinicians' situation or environment that clinicians consider discourages or encourages them to offer genetic testing in practice, including impacting the development of capability, motivation or social opportunity to offer genetic testing. |
| Social/Professional Role and Identity | A coherent set of behaviours and displayed personal qualities of an individual in a social or work setting                                                                            | Clinicians' perceived professional role and identity in relation to offering genetic tests                                                                                                                                                                                      |
| Beliefs about Capabilities            | Acceptance of the truth, reality or validity about at ability, talent, or facility that a person can put to constructive use                                                          | Clinicians' perception about their own capability to consider genetic testing (terms used in literature: confidence, comfort, control)                                                                                                                                          |
| Optimism                              | The confidence that things will happen for the best or that desired goals will be attained                                                                                            | Clinicians' optimism or pessimism that genetic testing will be appropriately integrated into clinical practice and will improve healthcare generally                                                                                                                            |
| Beliefs about Consequences            | Acceptance of the truth, reality, or validity about outcomes of a behaviour in a given situation                                                                                      | Clinicians' perceptions about the value of offering genetic testing in clinical practice – whether it is worthwhile in that it will improve patient outcomes in their own practice (term used in literature: attitude)                                                          |
| Intentions                            | A conscious decision to perform a behaviour or a resolve to act in a certain way                                                                                                      | Clinicians' intentions to consider genetic testing                                                                                                                                                                                                                              |
| Goals                                 | Mental representations of outcomes or end states that an individual wants to achieve                                                                                                  | Whether clinicians offering genetic testing is a priority within their practice                                                                                                                                                                                                 |
| Reinforcement                         | Increasing the probability of a response by arranging a dependent relationship, or contingency,                                                                                       | Incentives, rewards, sanctions, reinforcement at any level (eg patient satisfaction; better client health; economic incentives) that                                                                                                                                            |

|         |                                                                                                                                                                            |                                                                      |
|---------|----------------------------------------------------------------------------------------------------------------------------------------------------------------------------|----------------------------------------------------------------------|
|         | between the response and a given stimulus                                                                                                                                  | encourage or increase clinicians' decisions to offer genetic testing |
| Emotion | A complex reaction pattern, involving experiential, behavioural, and physiological elements, by which the individual attempts to deal with a personally significant matter | Clinicians feelings when they consider genetic testing               |

1

2

### 3 *Stage 1 Procedures*

4 Two behavioural researchers independently recoded ten of the Melbourne Genomic  
 5 evaluation interview data according to the TDF, then compare findings for inter-rater  
 6 reliability. The remaining 22 interviews will be recoded by one researcher. Where there are  
 7 differences or queries a TDF expert will be used to advise on the appropriate coding. Once  
 8 complete the recoded data will be discussed with the expert resource group for sense  
 9 checking.

10

### 11 *Stage 1 Data Analysis Plan*

12 Interview data will be audio recorded, fully transcribed and entered into NVivo 11 (QSR  
 13 International Pty Ltd., 2015). Analysis will vary dependent on the interview intent. The TDF  
 14 reanalysis of the Melbourne Genomic data will establish target behaviour areas and key  
 15 barriers to focus on in subsequent interviews. The recoding process using the TDF will also  
 16 allow identification of psychosocial domains within each target area. Domains not identified  
 17 will be included in the stage 2a clinical process interviews to identify if they have relevance  
 18 within each target area.

19

20 Stage 2a: Hybrid Model 1 pre, during, and post implementation

1  
2  
3 1 *Stage 2a Participants and recruitment*

4  
5 2 Two key participant groups, each of which will be recruited for one or more of the different  
6  
7 3 interviews and focus groups will be drawn from the Australian and Melbourne Genomic  
8  
9 4 Flagships. Given the focus on service provision and policy, and clinical process aspects of  
10  
11 5 implementation, the target groups for participation represented these areas:

12  
13 a) Service provision pathway participants: Decision-makers and stakeholders (both  
14  
15 7 clinical and administrative) who play a key role in either flagship leadership, funding and  
16  
17 8 financing strategies, genomic testing characteristics and costs, organisational and community  
18  
19 9 factors or policy.

20  
21 b) Clinical process delivery participants: Clinical non-genetics medical specialists (e.g.,  
22  
23 11 oncologists, neurologists,).

24  
25  
26  
27 12 **Table 3: Stage 2a Interview Inclusion Criteria**

28  
29  
30  
31  
32  
33  
34  
35  
36  
37  
38  
39  
40  
41  
42  
43  
44  
45  
46  
47  
48  
49  
50  
51  
52  
53  
54  
55

| <b><i>Service provision participant inclusion criteria</i></b>  |                                                                                                                                 |
|-----------------------------------------------------------------|---------------------------------------------------------------------------------------------------------------------------------|
| <b>Inclusion Criteria</b>                                       | <b>Justification</b>                                                                                                            |
| Strategic decision makers or                                    | Involved with direction and funding for services including genomics                                                             |
| Service level managers or above (e.g. CEO) or                   | Will have either signed off on a flagship application, have a flagship running in their organisation, or be managing a flagship |
| Senior clinical geneticists                                     | Will have an overview of genomic testing in more than one flagship across clinical genetics and medical specialities            |
| Flagship involvement from any phase of implementation           | To gather views across the implementation journey                                                                               |
| Draw participants from a cross section of locations             | To ensure a broad representation of views                                                                                       |
| <b><i>Clinical processes participant inclusion criteria</i></b> |                                                                                                                                 |
| <b>Inclusion Criteria</b>                                       | <b>Justification</b>                                                                                                            |
| Medical specialists (excluding clinical geneticists)            | Focus of study is mainstream tertiary implementation in the long term                                                           |
| AND working within a flagship                                   | Practitioner will have genomics knowledge                                                                                       |

|                                                               |                                                   |
|---------------------------------------------------------------|---------------------------------------------------|
| Flagship involvement from any phase of implementation         | To gather views across the implementation journey |
| Working in Australian Genomics or Melbourne Genomics flagship | These are the sites for the genomic work          |
| Draw participants from a cross section of locations           | To ensure a broad representation of views         |

1

2 Selection criteria will be established (see Table 3) to facilitate recruitment of expert  
 3 informers for interview based on their experiences of implementation of genomics in their  
 4 organisation. Individuals fulfilling the inclusion criteria will be identified using the  
 5 knowledge of the expert resource group. Recruitment for individual interviews and focus  
 6 groups will consist of multiple strategies, including making use of the networks of the expert  
 7 resource group to facilitate research-participant contact; individual emails will be sent.  
 8 Interview times and locations will be arranged based on convenience for interviewees to  
 9 enhance the likelihood of participation.

10

#### 11 *Stage 2a Data collection tools*

12 A process mapping guide (Figure 4), a clinical audit, two semi structured interview schedules  
 13 (Supplementary File 2 and 3), and an intervention co-design guide (Supplementary File 4)  
 14 will be used to gather qualitative and quantitative data.

15 ***Clinical process mapping template:*** informed by stage 1 interviews and the expert resource  
 16 group, the template (Figure 4) will present an outline of the WES process to participants,  
 17 covering a) the patient presenting at clinic, b) the process for analysis, and c) communication  
 18 of results to patient. Each section will act as a prompt to clarify processes and an opportunity  
 19 for participants to amend the outline process map in relation to processes specific to their  
 20 clinical area (e.g., childhood syndromes, cancer, etc.) with regards to where processes begin  
 21 and end, tasks involved, who contributes, who is affected, and where glitches occur in the

1 system. This will enhance understanding as to how current clinical processes have emerged  
2 and are currently operating from a pre-, during-, and/or post-implementation of WES  
3 perspective. Furthermore, emergent barriers to implementation, and any current or suggested  
4 intervention strategies captured as part of these discussions will be noted.

5 ***Clinical practice audit tools:*** collects information about recorded practice prior to, during  
6 and post-implementation of genomic sequencing. Audit data will be collected to reflect key  
7 components of the process map to demonstrate where gaps, blocks, and problems exist in the  
8 system. For example, date stamped data of the detailed patient journey from referral into  
9 WES, test ordering and interpretation, and communication of results to patients will be  
10 collected and matched to specific process map steps.

11 ***Clinical processes interview schedule:*** collects views from non-genetic clinical specialists on  
12 the early, mid and late phases of implementing a flagship. The interview schedule, informed  
13 by the results of the Stage 1 TDF-coded interviews, and informed by the Melbourne  
14 Genomics Community Advisory Group, is framed according to relevant TDF domains.

15 Questions enquire about the same three key behavioural areas examined in the process map:  
16 a) the patient presenting at clinic, b) the process for analysis, and c) communication of  
17 results to patient. For example, in the third behavioural area, ‘communicating results,’ the  
18 question relating to the ‘emotion’ TDF domain is *When results are uncertain how do you feel*  
19 *about feeding this back to the patient?* And for the ‘optimism’ TDF domain; *What gives you*  
20 *confidence that this process is being handled well?.*

21  
22 ***Service provision interview schedule:*** collects views from key decision makers and  
23 stakeholders on factors influencing the uptake of genomic medicine at different phases of  
24 implementation, and on preparing for the transition from flagship to ordinary clinical service  
25 status for the sustainability of genomic testing once programmatic funding has ended. Areas

1 identified for exploration at interview were debated with the expert resource group, with  
2 Spoth et al's (2013) TSci Impact framework being favoured for investigating translation  
3 phases of pre-adoption, adoption, implementation, and sustainability from a service provision  
4 and policy perspective. Some interviewees will need to reflect back on the early phases of pre  
5 adoption, while others will be in the translation function so will be able to draw on current  
6 experiences. To facilitate interview participants' focus on the phase under discussion a  
7 graphic has been developed to use at interview (see Figure 5). Working through the  
8 translation phases, questions focus on the following topic areas: 1) gaining clinical genomic  
9 knowledge; 2) influences on the decision to adopt; 3) the impact of the organisational setting  
10 and health system; and 4) influences on sustainability including disinvestment.

11  
12 ***Barrier verification and implementation intervention co-design guide:*** This two-phase  
13 guide will present a summary of information gathered in the process mapping interviews and  
14 audit data cross-matching exercise, and the clinical processes and service provision  
15 interviews (across the respective associated behavioural/topic areas covered), synthesised  
16 according to the TDF domains and BCTs. In phase 1, prompts and materials (Supplementary  
17 File 4) will be provided to encourage discussion about the barriers list presented, to elicit  
18 information about any additional barriers, and to narrow down a list of key barriers to focus  
19 upon. In phase 2b, a provisional list of intervention strategies that could be used to address  
20 those barriers will be presented. Guidance will be provided to facilitate the design of any new  
21 interventions using BCTs. A matrix will be provided to facilitate ranking of the interventions  
22 according to feasibility and impact on the associated barriers and subsequent behavioural  
23 areas (Supplementary File 4).

24  
25 *Stage 2a procedures for interviews and pre-focus group data synthesis*

1  
2  
3 1 **Generic interview procedure:** Before commencing all interviews, the interviewer (SB) will  
4  
5 2 go over consent procedures, provide a Participant Information Sheet, obtain permission to  
6  
7 3 record the interview, and then record verbal consent. The interview, which is likely to last  
8  
9 4 around 60 minutes, will be recorded using a digital recorder, then transcribed. All participants  
10  
11 5 will be assigned a code (e.g. Participant CP/SL 1, 2 3 etc) and interviewees will only be  
12  
13 6 identified via these codes. Digital audio files will be imported into the software Nvivo 11  
14  
15 7 (QSR International Pty Ltd., 2015) to facilitate analysis.

16  
17  
18 8 **Process mapping interview and integration with audit data:** Hard copies of outline process  
19  
20 9 maps (Figure 4) will be handed to clinical process interviewees to prompt discussion about  
21  
22 10 the process for that particular clinical area (e.g., paediatric rare diseases, cancer, etc.), inform  
23  
24 11 refinements to the map, and elicit information about barriers and facilitators to undertaking  
25  
26 12 the process. These data will be transferred into Microsoft Visio software; participants will be  
27  
28 13 contacted via email, and asked to review their revised map and suggest any refinements. The  
29  
30 14 provisional list of audit data collection variables will be finalised on the basis of the process  
31  
32 15 map, collected via organisation electronic and/or paper based patient records, with relevant  
33  
34 16 information cross-matched to specific parts of the process. The outputs of this stage of the  
35  
36 17 project will be: a) a detailed, visual, and data-verified outline of clinical area-specific  
37  
38 18 processes for genomic testing pathways, and b) a data-driven method of identifying key gaps  
39  
40 19 or imperfections in the process, and c) a set of emergent barriers and existing or potential  
41  
42 20 interventions for improvement of processes.

43  
44  
45  
46 21 **Clinical process:** The TDF based interview schedule (see Supplementary File 2) will be used  
47  
48 22 with clinical process interviewees to discuss, using the lens of a psychosocial and  
49  
50 23 environmental theoretical framework, barriers and facilitators to implementation of genomics  
51  
52 24 in clinical practice, and to elicit information about existing or potential interventions for  
53  
54  
55

1  
2  
3 1 improvement. The outputs from this data collection procedure will be information on TDF  
4  
5 2 based barriers and emergent interventions.

6  
7 3 ***Service provision and policy interviews:*** The TSci Impact framework based interview  
8  
9 4 schedule (see Supplementary File 3) will be used with service provision and policy  
10  
11 5 interviewees to discuss factors influencing the uptake of genomic medicine at different  
12  
13 6 phases of implementation using the lens of translating science into policy and services  
14  
15 7 perspective. Outputs here will include, data on policy and service provider factors affecting  
16  
17 8 implementation pathway, and information on emergent barriers and interventions.

19  
20 9  
21  
22 10 *Stage 2a Data-informed focus group schedule development and data collection*

23  
24 11 ***Preparation of focus group materials through synthesis of interview data:*** Data from the  
25  
26 12 stage 1 recoding, and stage 2a process mapping/audit data, clinical process, and service  
27  
28 13 provision interviews will be synthesised by the expert resource group in preparation for the  
29  
30 14 focus groups (Supplementary File 4). For both clinical processes and service provision and  
31  
32 15 policy, summary tables will be developed with a set of key target areas for improvement,  
33  
34 16 context specific barriers and corresponding TDF domains, emergent intervention strategies  
35  
36 17 alongside corresponding BCTs, and instructions for ranking the likely impact and feasibility  
37  
38 18 of intervention strategies. Key barriers from all the clinical specialities will be combined to  
39  
40 19 develop generalisable interventions.

41  
42  
43  
44 20 *Focus Groups (two phases):* The synthesised data will be used with a multidisciplinary group  
45  
46 21 of clinicians and service provision/policy decision makers to verify barriers and co-design an  
47  
48 22 implementation strategy using both emergent and evidence based behaviour change  
49  
50 23 approaches. Using the materials from the data synthesis exercise, the discussion in phase 1  
51  
52 24 will be used to verify and identify any additional barriers, and to rank barriers according to  
53  
54 25 level of impact on behavioural areas. Phase 2 discussions, informed by phase 1 and with a



1  
2  
3  
4  
5  
6  
7  
8  
9  
10  
11  
12  
13  
14  
15  
16  
17  
18  
19  
20  
21  
22  
23  
24  
25  
26  
27  
28  
29  
30  
31  
32  
33  
34  
35  
36  
37  
38  
39  
40  
41  
42  
43  
44  
45  
46  
47  
48  
49  
50  
51  
52  
53  
54  
55  
56  
57  
58  
59  
60

1 provisional list of intervention strategies, will be used to co-design interventions to address  
2 the high impact barriers to implementation using the most feasible and likely impactful  
3 intervention strategies.

#### 5 *Stage 2a Development of foundation intervention package*

6 A draft intervention package will be developed using the recorded and written focus group  
7 data to present intervention strategies to address key barriers to clinical processes and service  
8 provision implementation of genomics evidence into practice. Both interview/focus group  
9 participants, the expert resource group, and the Consumer Advisory groups of the Australian  
10 and Melbourne Genomics Health Alliances will be invited to review the contents of the first  
11 iteration of the genomics implementation toolkit.

#### 13 *Stage 2a Data Analysis Plan*

14 **Data Synthesis prior to focus groups:** Initial synthesis will be undertaken by SB. The process  
15 mapping and clinical audit data will be analysed for data on processes, individual  
16 interactions, data driven gaps (within the four target areas) and also emergent barriers and  
17 interventions. Clinical process interview data will be analysed deductively using the TDF to  
18 identify key domains representing barriers to change, and appropriate BCTs will be mapped  
19 to these domains as an evidence based approach to intervention strategy development.<sup>25-27</sup>

20 Service provision interviews will be thematically analysed and used to identify key areas for  
21 development of service provision planning. These data will also be analysed according to the  
22 TDF and BCTs to facilitate the combined approach to developing clinical process and service  
23 provision interventions for the two phase focus groups. These processes, barriers and  
24 intervention data within the target areas will be collated and shared with the expert resource  
25 group. The expert resource group will analyse these data and develop the focus group

1 materials to demonstrate key reported barriers to and suggested intervention strategies for  
2 effective implementation of genomics in practice.

3 **Focus group analysis:** Individual focus group analysis will be undertaken using the TDF and  
4 BCTs to identify validated and new barriers to change, and BCTs, respectively. Results of  
5 this exercise from each focus group will be provisionally combined to generate the first  
6 iteration of the genomics implementation toolkit.

### 8 **Patient and Public Involvement**

9 The Stage 2a clinical processes interview schedule is informed by the results of the Stage 1  
10 TDF-coded interviews. Patient and public involvement was sought from the Melbourne  
11 Genomics Community Advisory Group. Through a facilitated discussion the group identified  
12 their priorities areas for implementation and sustainable delivery of genomics (for example  
13 “how do you manage patient expectation?”) which were incorporated into the interview  
14 schedule. Findings from data collection will be discussed with the Consumer Advisory  
15 groups of the Australian and Melbourne Genomics Health Alliances and they will be invited  
16 to review the contents of the first iteration of the genomics implementation toolkit.

### 18 **ETHICS AND DISSEMINATION**

19 Ethical approval for this study has been granted by Melbourne Health HREC on November 3,  
20 2017, approval number: HREC/13/MH/326. Governance approval has been provided by  
21 participating organisations.

22 Dissemination of results will be undertaken through traditional academic forums, but  
23 also through the information generated through this research being used to refine and apply  
24 evidence based and pragmatic interventions into health systems for the translation of  
25 genomics into practice.

1  
2  
3 14  
5 2 **DISCUSSION**

6  
7 3 In Australia, the majority of clinical genomic sequencing is currently funded through research  
8  
9 4 activities. Melbourne Genomics and Australian Genomics bridge the gap between research  
10  
11 5 and established clinical practice. They represent systematic national and state-based efforts to  
12  
13 6 integrate genomics into everyday healthcare at the coal-face. For the majority of Flagships  
14  
15 7 and health professionals working within them – many of whom are not experts in the field of  
16  
17 8 genomics – this is the first time genomic sequencing tests have been available to them ‘in real  
18  
19 9 time’. Whilst they are making efforts to incorporate this into their practice, it is impossible  
20  
21 10 for clinicians – genetic and non-genetic alike – to know what the ‘*ideal*’ is yet. Therefore, no  
22  
23 11 precedent exists for *effectively* implementing genomics into practice for numerous clinical  
24  
25 12 conditions across different contexts. The diversity of health professional disciplines, health  
26  
27 13 care organisations and clinical indications participating across the 29 Flagships, will realise  
28  
29 14 the ultimate goal of this work: to establish the ‘*ideal*’ and develop a generalisable model of  
30  
31 15 implementation that future organisations can apply and tailor to their local contexts.

32  
33  
34  
35 16 The detailed methods for the current body of work – stage 1 and 2a, forming the  
36  
37 17 foundations of this transformative translational change program, have been presented here.  
38  
39 18 Future work will then build on data and strategies developed as part of Hybrid Model 1. To  
40  
41 19 summarise, Hybrid Model 2 (see Figure 1 - Stage 2b) will consist of a simultaneous test of  
42  
43 20 the clinical effectiveness of genomic sequencing and the implementation toolkit  
44  
45 21 concurrently<sup>20</sup> in new Flagships. Quantitative and qualitative measures for assessing  
46  
47 22 implementation effectiveness will be developed. A formal, concurrent test of the clinical  
48  
49 23 effectiveness of genomics and the implementation toolkit will be undertaken, allowing for a  
50  
51 24 detailed analysis, distinction, and explanation of the complex factors associated with clinical  
52  
53 25 versus implementation effectiveness. These findings will be used to further refine the toolkit.

1  
2  
3 1 The final stage (Hybrid model 3) (see Figure 1 - Stage 3) will focus on testing the  
4  
5 2 refined implementation toolkit while simply observing the genomics intervention, and related  
6  
7 3 outcomes.<sup>20</sup> Consolidating the earlier work, this stage will include real world testing of the  
8  
9 4 implementation toolkit (e.g., RCT; stepped wedge trial) against a comparison, and/or with a  
10  
11 5 standard roll out, with the aim of informing state and national policy and decision making.  
12

13  
14 6 This is the first nationally based real-world study of a large cohort of CASs,  
15  
16 7 deliberately attempting to integrate genomics into a real world, complex health system. To  
17  
18 8 study and support implementation of a technology with far-reaching consequences but  
19  
20 9 currently limited evidence base, we have developed a novel methodological approach  
21  
22 10 consisting of complexity science, policy and service provision, and individual level behaviour  
23  
24 11 change frameworks, and progressively more rigorous research designs. Disentangling clinical  
25  
26 12 research processes from those which support adoption of a new standard of care, our work  
27  
28 13 will provide streamlined recommendations for future healthcare organisations planning to  
29  
30 14 translate genomics into their health system. This methodology may be one that lends itself to  
31  
32 15 study and support the adoption of other potentially ‘paradigm shifting’ technologies.  
33  
34  
35  
36  
37

## 38 LIST OF ABBREVIATIONS

|    |    |                                                      |
|----|----|------------------------------------------------------|
| 39 |    |                                                      |
| 40 | 18 | BCT Behaviour change technique                       |
| 41 |    |                                                      |
| 42 | 19 | CAS Complex adaptive system                          |
| 43 |    |                                                      |
| 44 | 20 | TDF Theoretical Dmains Framework                     |
| 45 |    |                                                      |
| 46 | 21 | TSci Impact Translation Science to Population Impact |
| 47 |    |                                                      |
| 48 | 22 | WES Whole Exome Sequencing                           |
| 49 |    |                                                      |
| 50 |    |                                                      |
| 51 | 23 |                                                      |
| 52 |    |                                                      |
| 53 |    |                                                      |

## 54 REFERENCES

- 1 1. Guttmacher AE, Collins FS. Welcome to the Genomic Era. *N Engl J Med*  
2 2003;349(10):996-98. doi: 10.1056/NEJMe038132
- 3 2. Khoury MJ. No shortcuts on the long road to evidence-based genomic medicine. *JAMA*  
4 2017;318(1):27-28. doi: 10.1001/jama.2017.6315
- 5 3. Roberts MC, Kennedy AE, Chambers DA, et al. The current state of implementation  
6 science in genomic medicine: opportunities for improvement. *Genet Med*  
7 2017;19:858. doi: 10.1038/gim.2016.210
- 8 4. Gaff CL, Winship I, Forrest S, et al. Preparing for genomic medicine: a real world  
9 demonstration of health system change. *NPJ Genom Med* 2017;2(1):16. doi:  
10 10.1038/s41525-017-0017-4
- 11 5. Stark Z, Schofield D, Alam K, et al. Prospective comparison of the cost-effectiveness of  
12 clinical whole-exome sequencing with that of usual care overwhelmingly supports  
13 early use and reimbursement. *Genet Med* 2017;19:867. doi: 10.1038/gim.2016.221
- 14 6. Walsh M, Bell KM, Chong B, et al. Diagnostic and cost utility of whole exome sequencing  
15 in peripheral neuropathy. *Annals of Clinical and Translational Neurology*  
16 2017;4(5):318-25. doi: 10.1002/acn3.409
- 17 7. Perucca P, Scheffer IE, Harvey AS, et al. Real-world utility of whole exome sequencing  
18 with targeted gene analysis for focal epilepsy. *Epilepsy Res* 2017;131:1-8. doi:  
19 10.1016/j.eplesyres.2017.02.001
- 20 8. Stark Z, Schofield D, Martyn M, et al. Does genomic sequencing early in the diagnostic  
21 trajectory make a difference? A follow-up study of clinical outcomes and cost-  
22 effectiveness. *Genet Med* 2018 doi: 10.1038/s41436-018-0006-8
- 23 9. Kannampallil TG, Schauer GF, Cohen T, et al. Considering complexity in healthcare  
24 systems. *J Biomed Inform* 2011;44(6):943-47.
- 25 10. Kuziemy C. Decision-making in healthcare as a complex adaptive system. *Healthc*  
26 *Manage Forum* 2016;29(1):4-7. doi: 10.1177/0840470415614842
- 27 11. Braithwaite J, Clay-Williams R, Nugus P, et al. Healthcare as a complex adaptive system.  
28 In: Hollnagel E, Braithwaite J, Wears R, eds. *Resilient Health Care*. Oxon, UK:  
29 Ashgate 2013.
- 30 12. Ellis B, Herbert S. Complex adaptive systems (CAS): an overview of key elements,  
31 characteristics and application to management theory. *J Innov Health Inform*  
32 2011;19(1):33-37.

- 1  
2  
3 1 13. Benham-Hutchins M, Clancy TR. Social networks as embedded complex adaptive  
4 2 systems. *J Nurs Adm* 2010;40(9):352-56. doi: 10.1097/NNA.0b013e3181ee42bc  
5  
6 3 14. The Health Foundation. Evidence scan: Complex adaptive systems. London, 2010.  
7  
8 4 15. Braithwaite J, Churruarua K, Ellis LA, et al. Complexity Science in Healthcare –  
9 5 aspirations, approaches, applications and accomplishments: A White Paper:  
10 6 Australian Institute of Health Innovation, Macquarie University 2017.  
11  
12 7 16. Sperber NR, Carpenter JS, Cavallari LH, et al. Challenges and strategies for  
13 8 implementing genomic services in diverse settings: experiences from the  
14 9 Implementing GeNomics In pracTicE (IGNITE) network. *BMC Med Genomics*  
15 10 2017;10(1):35. doi: 10.1186/s12920-017-0273-2  
16  
17 11 17. Glasgow RE, Lichtenstein E, Marcus AC. Why don't we see more translation of health  
18 12 promotion research to practice? Rethinking the efficacy-to-effectiveness transition.  
19 13 *Am J Public Health* 2003;93(8)  
20  
21 14 18. Stetler CB, Legro MW, Wallace CM, et al. The Role of Formative Evaluation in  
22 15 Implementation Research and the QUERI Experience. *J Gen Intern Med*  
23 16 2006;21(Suppl 2):S1-S8. doi: 10.1111/j.1525-1497.2006.00355.x  
24  
25 17 19. Stetler CB, Mittman BS, Francis J. Overview of the VA Quality Enhancement Research  
26 18 Initiative (QUERI) and QUERI theme articles: QUERI Series. *Implement Sci*  
27 19 2008;3:8-8. doi: 10.1186/1748-5908-3-8  
28  
29 20 20. Curran GM, Bauer M, Mittman B, et al. Effectiveness-implementation hybrid designs:  
30 21 combining elements of clinical effectiveness and implementation research to enhance  
31 22 public health impact. *Med Care* 2012;50(3):217.  
32  
33 23 21. Michie S, Johnston M, Abraham C, et al. Making psychological theory useful for  
34 24 implementing evidence based practice: a consensus approach. *Qual Saf Health Care*  
35 25 2005;14(1):26-33. doi: 10.1136/qshc.2004.011155  
36  
37 26 22. Hasan H. Applying principles of Complexity Theory in practice. In: Hasan H, ed. Being  
38 27 Practical with Theory: A Window into Business Research. Wollongong, Australia:  
39 28 Faculty of Business, University of Wollongong 2014:148-50.  
40  
41 29 23. Paina L, Peters DH. Understanding pathways for scaling up health services through the  
42 30 lens of complex adaptive systems. *Health Policy Plan* 2012;27(5):365-73. doi:  
43 31 10.1093/heapol/czr054  
44  
45 32 24. Spoth R, Rohrbach LA, Greenberg M, et al. Addressing core challenges for the next  
46 33 generation of type 2 translation research and systems: the translation science to

- 1  
2  
3 1 population impact (TSci Impact) framework. *Prev Sci* 2013;14(4):319-51. doi:  
4 2 10.1007/s11121-012-0362-6  
5  
6 3 25. Michie S, van Stralen MM, West R. The behaviour change wheel: A new method for  
7 4 characterising and designing behaviour change interventions. *Implement Sci*  
8 5 2011;6(1):42. doi: 10.1186/1748-5908-6-42  
9  
10 6 26. Michie S, Richardson M, Johnston M, et al. The Behavior Change Technique Taxonomy  
11 7 (v1) of 93 Hierarchically Clustered Techniques: Building an International Consensus  
12 8 for the Reporting of Behavior Change Interventions. *Ann Behav Med* 2013;46(1):81-  
13 9 95. doi: 10.1007/s12160-013-9486-6  
14  
15 10 27. Cane J, O'Connor D, Michie S. Validation of the theoretical domains framework for use  
16 11 in behaviour change and implementation research. *Implement Sci* 2012;7(1):37. doi:  
17 12 10.1186/1748-5908-7-37  
18  
19 13 28. Taylor N, Lawton R, Moore S, et al. Collaborating with front-line healthcare  
20 14 professionals: the clinical and cost effectiveness of a theory based approach to the  
21 15 implementation of a national guideline. *BMC Health Serv Res* 2014;14(1):1-10. doi:  
22 16 10.1186/s12913-014-0648-4  
23  
24 17 29. Taylor N, Lawton R, Slater B, et al. The demonstration of a theory-based approach to the  
25 18 design of localized patient safety interventions. *Implement Sci* 2013;8(1):123. doi:  
26 19 10.1186/1748-5908-8-123  
27  
28 20 30. Taylor N, Long J, Debono D, et al. Achieving behaviour change for detection and  
29 21 management of Lynch syndrome using the Theoretical Domains Framework  
30 22 Implementation (TDFI) approach: a study protocol. *BMC Health Serv Res*  
31 23 2016;16:89. doi: 10.1186/s12913-016-1331-8  
32  
33 24 31. Taylor N, Parveen S, Robins V, et al. Development and initial validation of the Influences  
34 25 on Patient Safety Behaviours Questionnaire. *Implement Sci* 2013;8(1):81. doi:  
35 26 10.1186/1748-5908-8-81  
36  
37 27 32. Valente TW. Social networks and health: Models, methods, and applications. New York:  
38 28 Oxford University Press 2010.  
39  
40 29 33. Czaja SJ, Schulz R, Lee CC, et al. A methodology for describing and decomposing  
41 30 complex psychosocial and behavioral interventions. *Psychol Aging* 2003;18(3):385.  
42 31 doi: 10.1037/0882-7974.18.3.385  
43  
44  
45  
46  
47  
48  
49  
50  
51  
52  
53  
54  
55  
56  
57  
58  
59  
60

- 1  
2  
3 1 34. Czaja SJ, Nair SN. Human factors engineering and systems design. In: Salvendy G, ed.  
4 2 Handbook of Human Factors and Ergonomics. Third ed: John Wiley & Sons 2006:32-  
5 3 49.  
6  
7  
8 4 35. Valente TW, Chou CP, Pentz MA. Community coalitions as a system: effects of network  
9 5 change on adoption of evidence-based substance abuse prevention. *Am J Public*  
10 6 *Health* 2007;97(5):880-86.  
11  
12 7 36. Barach P, Johnson J. Understanding the complexity of redesigning care around the  
13 8 clinical microsystem. *Qual Saf Health Care* 2006;15(suppl 1):i10-i16. doi:  
14 9 10.1136/qshc.2005.015859  
15  
16 10 37. Graham ID, Logan J, Harrison MB, et al. Lost in knowledge translation: time for a map?  
17 11 *J Contin Educ Health Prof* 2006;26(1):13-24.  
18  
19 12 38. Davidoff F, Dixon-Woods M, Leviton L, et al. Demystifying theory and its use in  
20 13 improvement. *BMJ Quality & Safety* 2015 doi: 10.1136/bmjqs-2014-003627  
21  
22 14 39. Little EA, Pesseau J, Eccles MP. Understanding effects in reviews of implementation  
23 15 interventions using the Theoretical Domains Framework. *Implement Sci*  
24 16 2015;10(1):90. doi: 10.1186/s13012-015-0280-7  
25  
26 17 40. McSherry LA, Dombrowski SU, Francis JJ, et al. 'It's a can of worms': understanding  
27 18 primary care practitioners' behaviours in relation to HPV using the theoretical  
28 19 domains framework. *Implement Sci* 2012;7(1):73. doi: 10.1186/1748-5908-7-73  
29  
30 20 41. Heslehurst N, Newham J, Maniatopoulos G, et al. Implementation of pregnancy weight  
31 21 management and obesity guidelines: a meta-synthesis of healthcare professionals'  
32 22 barriers and facilitators using the Theoretical Domains Framework. *Obes Rev*  
33 23 2014;15(6):462-86.  
34  
35 24 42. Sox HC, Greenfield S. Comparative effectiveness research: A report from the institute of  
36 25 medicine. *Ann Intern Med* 2009;151(3):203-05. doi: 10.7326/0003-4819-151-3-  
37 26 200908040-00125  
38  
39 27 43. Phillips KA, Deverka PA, Sox HC, et al. Making genomic medicine evidence-based and  
40 28 patient-centered: a structured review and landscape analysis of comparative  
41 29 effectiveness research. *Genet Med* 2017;19(10):1081-91. doi: 10.1038/gim.2017.21  
42  
43 30 44. Stark Z, Lunke S, Brett GR, et al. Meeting the challenges of implementing rapid genomic  
44 31 testing in acute pediatric care. *Genet Med* 2018 doi: 10.1038/gim.2018.37  
45  
46 32 45. Pinnock H, Barwick M, Carpenter CR, et al. Standards for Reporting Implementation  
47 33 Studies (StaRI) Statement. *BMJ* 2017;356 doi: 10.1136/bmj.i6795  
48  
49  
50  
51  
52  
53  
54  
55  
56  
57  
58  
59  
60



- 1  
2  
3 1 46. Paul G, MGenCouns HL, Trainer AH, et al. A theory-informed systematic review of  
4 2 clinicians' genetic testing practices. *Preparing to submit to the European Journal of*  
5 3 *Genetics* in preparation  
6  
7  
8  
9 4

## 5 **AUTHORS' CONTRIBUTIONS**

6 NT conceived, designed and developed the detail of the study, provided advice for ethical  
7 approval, led and coordinated writing the paper. SB developed the detail of the study design,  
8 co-led the ethical approval and co-led writing the paper. MM conceived and co-designed the  
9 study details, led the ethical approval process, and reviewed the paper. JCL co-designed the  
10 study details, provided advice for ethical approval and reviewed the paper. KN is the Chief  
11 Investigator for the Australian Genomics Health Alliance NHMRC grant; she contributed to  
12 conception of the study, provided strategic input and reviewed the paper. JB contributed to  
13 conception of the study, provided advice, strategic input and expertise in implementation and  
14 complexity science, and reviewed the paper. CG conceived and co-designed the study,  
15 provided advice, strategic input and reviewed the paper. All authors read and approved the  
16 final manuscript. KN, CG and JB are chief investigators on the National Health and Medical  
17 Research Council grant funding the Australian Genomics Health Alliance.

## 19 **FUNDING STATEMENT**

20 The Melbourne Genomics Health Alliance is funded by the Victorian Government and the  
21 ten Alliance members (Royal Melbourne Hospital, Royal Children's Hospital, the University  
22 of Melbourne, Waltear and Eliza Hall Institute, Murdoch Children's Research Institute,  
23 Commonwealth Scientific and Industrial Research Organisation, Australian Genome

1 Research Facility, Peter MacCallum Cancer Centre, Austin Health, Monash Health). The  
2 Australian Genomics Health Alliance is funded by NHMRC grant 1113531.

#### 4 **COMPETING INTERESTS STATEMENT**

5 NT, SB, MM, JCL, KN, JB, CG have declared that no competing interests exist.

#### 7 **Tables, Figures and Additional Files**

##### 8 **Tables**

9 Table 1: Flagships as CASs

10 Table 2: Recoding Guide in text

11 Table 3: Stage 2a Interview Inclusion Criteria

##### 12 **Figures**

13 Figure 1: Implementation Research Plan

14 Figure 2: Frameworks to manage Complexity

15 Figure 3: Logic Model

16 Figure 4: Process Mapping Guide

17 Figure 5: Service Provision Interview Translation Phases Graphic

##### 18 **Supplementary Files**

19 Supplementary File 1: Stage 1 Evaluation Structured Interview Schedule

20 Supplementary File 2: Stage 2a, Semi Structured Interview Schedule, Clinical Processes

21 Supplementary File 3: Stage 2a, Semi Structured Interview Schedule Service Provision

22 Supplementary File 4: Co design guide for Focus Groups

23

Curran et al., 2012. Effectiveness-implementation Hybrid Designs. Med Care. 50(3): 217-226

**Hybrid Model 1:** Testing a clinical intervention whilst gathering information on its delivery during the effectiveness trial and/or on its potential for implementation in a real world situation

**Hybrid Model 2:** Simultaneous testing of a clinical intervention and an implementation/intervention strategy

**Hybrid Model 3:** Testing an implementation/intervention strategy while observing/gathering information on the clinical intervention and related outcomes

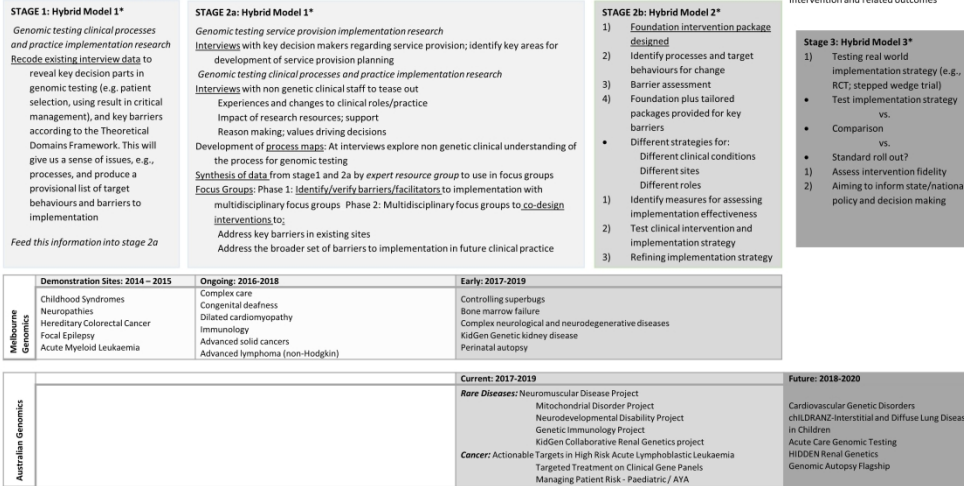

Figure 1: Implementation Research Plan

338x190mm (300 x 300 DPI)

| Broad elements of complexity                                   | Principles of complexity                                                                                                                    | Model or Framework used to understand and respond to complexity |
|----------------------------------------------------------------|---------------------------------------------------------------------------------------------------------------------------------------------|-----------------------------------------------------------------|
| Clinical effectiveness versus implementation effectiveness     | <ul style="list-style-type: none"> <li>- Edge of chaos</li> <li>- Self-organisation</li> <li>- Emergence</li> <li>- Simple rules</li> </ul> | Effectiveness-Implementation Hybrid Model                       |
| Policy decisions and service provision                         | <ul style="list-style-type: none"> <li>- Iteration</li> <li>- Sub-optimal</li> <li>- Requisite variety</li> </ul>                           | TSCImpact Model                                                 |
| Individual level behaviour change in a complex adaptive system | <ul style="list-style-type: none"> <li>- Interconnectivity and networks</li> <li>- Co-evolution</li> <li>- Nested systems</li> </ul>        | Theoretical Domains Framework                                   |

Figure 2: Frameworks to manage Complexity

338x190mm (300 x 300 DPI)

1  
2  
3  
4  
5  
6  
7  
8  
9  
10  
11  
12  
13  
14  
15  
16  
17  
18  
19  
20  
21  
22  
23  
24  
25  
26  
27  
28  
29  
30  
31  
32  
33  
34  
35  
36  
37  
38  
39  
40  
41  
42  
43  
44  
45  
46  
47  
48  
49  
50  
51  
52  
53  
54  
55  
56  
57  
58  
59  
60

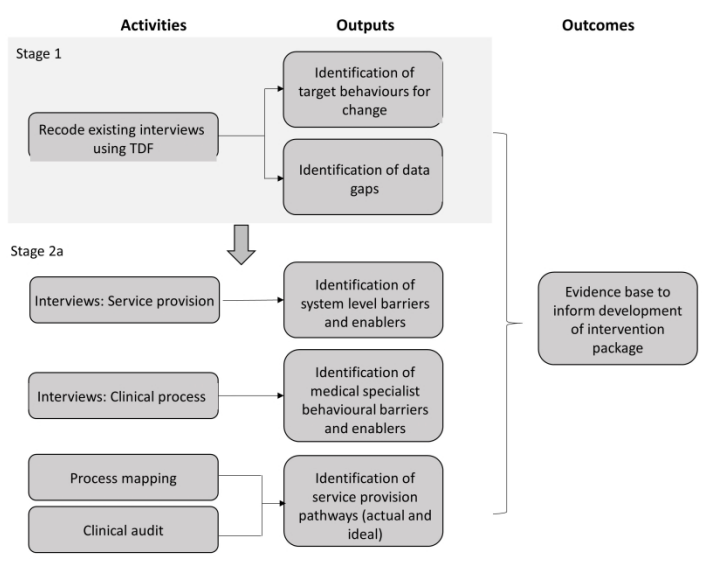

Figure 3: Logic Model

338x230mm (300 x 300 DPI)

Implementation of Genomic Testing 2018

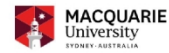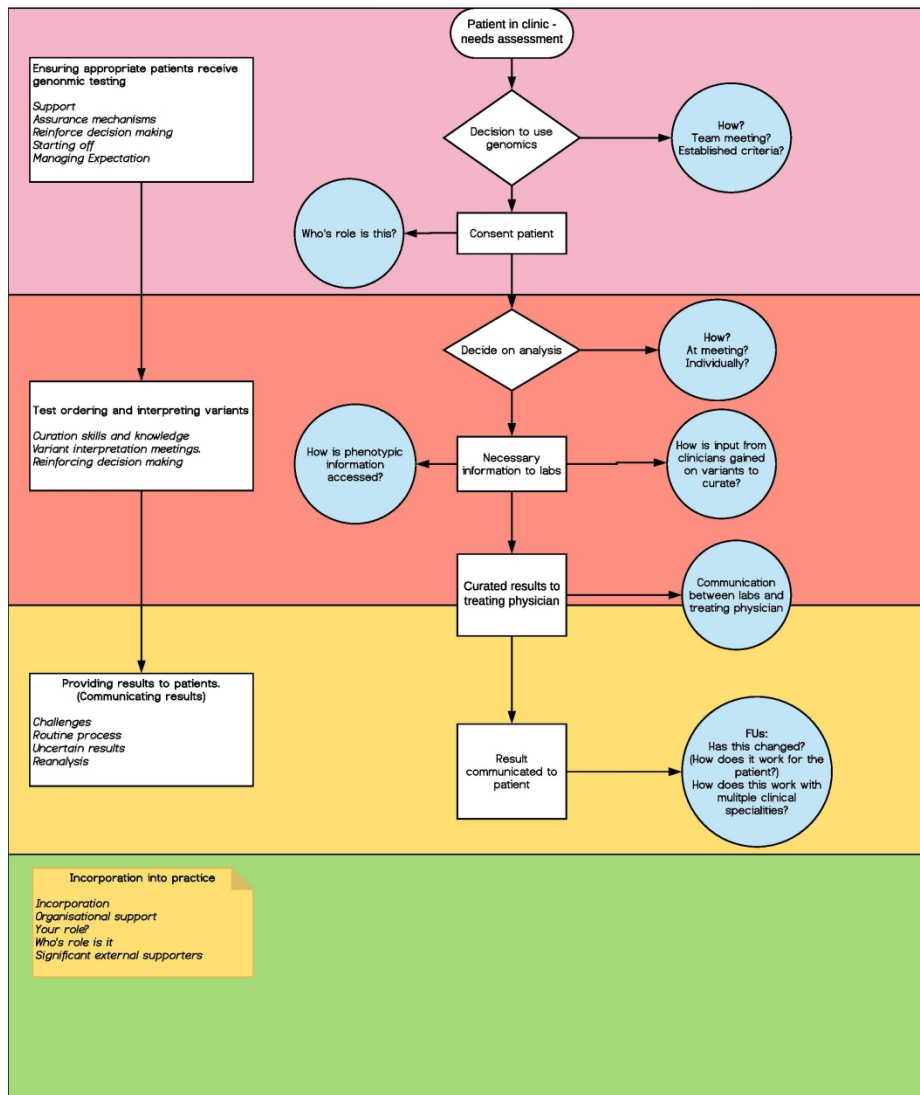

Figure 4: Process Mapping Guide

215x279mm (300 x 300 DPI)

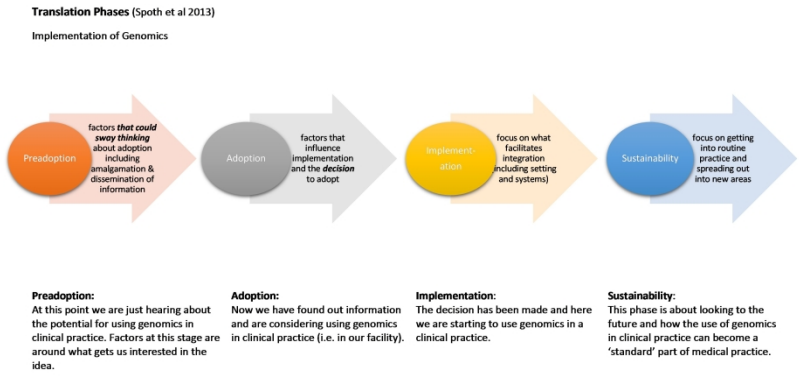

Spoth, R., Rohrbach, L. A., Greenberg, M., Leaf, P., Brown, C. H., Fagan, A., ... & Hawkins, J. D. (2013). Addressing core challenges for the next generation of type 2 translation research and systems: The translation science to population impact (TSci Impact) framework. *Prevention Science, 14*(4), 319-351.

Figure 5: Service Provision Interview Translation Phases Graphic

338x190mm (300 x 300 DPI)

## Supplementary Files

Supplementary File 1: Stage 1 Evaluation Structured Interview Schedule

Supplementary File 2: Stage 2a, Semi Structured Interview Schedule, Clinical Processes

Supplementary File 3: Stage 2a, Semi Structured Interview Schedule Service Provision

Supplementary File 4: Co design guide for Focus Groups

## Supplementary File 1: Stage 1 Evaluation Structured Interview Schedule

### Clinician Interviews – themes and questions

| Theme                                                                | Questions                                                                                                                                                                                                                                                                                                                                                                                                                                                                                                                                                                                                                                                                                                                                                                                                                                                                                                                                                                                                                                                                                                                                                                                                                                                                                                                            |
|----------------------------------------------------------------------|--------------------------------------------------------------------------------------------------------------------------------------------------------------------------------------------------------------------------------------------------------------------------------------------------------------------------------------------------------------------------------------------------------------------------------------------------------------------------------------------------------------------------------------------------------------------------------------------------------------------------------------------------------------------------------------------------------------------------------------------------------------------------------------------------------------------------------------------------------------------------------------------------------------------------------------------------------------------------------------------------------------------------------------------------------------------------------------------------------------------------------------------------------------------------------------------------------------------------------------------------------------------------------------------------------------------------------------|
| <b>Experience of participating in the demonstration project</b>      | <ol style="list-style-type: none"> <li>1. Please tell me about your involvement in the demonstration project</li> <li>2. From your perspective, what was the purpose of the MDT? How clear was this to you at the beginning?</li> <li>3. Do you feel the MDT altered over time? How?</li> <li>4. What did you like about the MDTs?</li> <li>5. What do you think should be done differently?</li> <li>6. On a scale of 1-5 how satisfied were you with the MDTs? (5 very satisfied, 4 satisfied, 3 neither satisfied nor dissatisfied, 2 dissatisfied, 1 very dissatisfied)</li> <li>7. What do you think is important to discuss during pre-test counselling?</li> <li>8. Did you receive a research report on any of your patients? How many? What type? (1/2 nothing reported, 3 VUS, 4a, 4a/5)</li> <li>9. Were you involved in returning results to patients?<br/>9.1. If yes, How did you approach this?<br/><i>Be aware may differ for diff types of result (nothing found, 3 VUS, 4a or 4b, 5).</i></li> <li>10. Thinking about the sorts of results you usually communicate to patients, was there anything different about returning this sort of result?</li> <li>11. So if I were to ask you to rate the difficulty you'd say it was...<br/><i>More difficult, the same as, less difficult do you agree?'</i></li> </ol> |
| <b>Impact</b> (What has the impact been? How have results impacted?) | <ol style="list-style-type: none"> <li>12. What impact has participating in this project had on your (clinical) practice?</li> <li>13. What impact has participating in this project had on your understanding of genomics?</li> </ol>                                                                                                                                                                                                                                                                                                                                                                                                                                                                                                                                                                                                                                                                                                                                                                                                                                                                                                                                                                                                                                                                                               |



|                                                                                                                                                                                                                                                          |                                                                                                                                                                                                                                                                                                                                                                                                                                                                                                                                                                                                                                                                                                                                                                                                                                                                                                                                                                                                                                                                                                                                                                                                                                                                         |
|----------------------------------------------------------------------------------------------------------------------------------------------------------------------------------------------------------------------------------------------------------|-------------------------------------------------------------------------------------------------------------------------------------------------------------------------------------------------------------------------------------------------------------------------------------------------------------------------------------------------------------------------------------------------------------------------------------------------------------------------------------------------------------------------------------------------------------------------------------------------------------------------------------------------------------------------------------------------------------------------------------------------------------------------------------------------------------------------------------------------------------------------------------------------------------------------------------------------------------------------------------------------------------------------------------------------------------------------------------------------------------------------------------------------------------------------------------------------------------------------------------------------------------------------|
| <p>1<br/>2<br/>3<br/>4<br/>5<br/>6<br/>7<br/>8<br/>9<br/>10<br/>11<br/>12<br/>13<br/>14<br/>15<br/>16<br/>17<br/>18<br/>19<br/>20<br/>21<br/>22<br/>23<br/>24<br/>25<br/>26<br/>27<br/>28<br/>29<br/>30</p> <p><b>Integration in future practice</b></p> | <p>14. Putting issues of funding aside, would you use/support the use of clinical genomic sequencing if it were available in (your) practice?<br/>If yes – when is there value in using it<br/>If unsure/ no – tell us more about this.</p> <p>15. What do you anticipate the barriers to incorporating genomics into practice (<i>in your specialty</i>) might be and how could these be overcome? (<i>funding model, clinician time, support for clinicians to attend from clinical managers</i>)</p> <p>16. If genomic sequencing were to be offered in routine clinical practice, how do you think decisions would be made about</p> <p>16.1. when to use exome sequencing?<br/>16.2. interpretation of results<br/>16.3. which genes to analyse</p> <p>17. What did you think about the approach Melbourne Genomics took of excluding genes for unrelated adult onset conditions to minimise incidental findings? Do you think patients should have the choice to receive information about variants that show a future risk of disease unrelated to their condition?</p> <p>18. Given that new genes are being identified and VUS are being reclassified as more is known, who do you think should be responsible for initiating a re-analysis in the future?</p> |
| <p>31<br/>32<br/>33<br/>34<br/>35<br/>36<br/>37<br/>38<br/>39</p> <p><b>Resources to support integration</b></p>                                                                                                                                         | <p>19. For which of these stages do you think resources would be helpful?</p> <p>20. What information would need to be included?</p> <p>21. What other resources might be helpful?</p> <p>22. What are the advantages/disadvantages of an online portal?</p>                                                                                                                                                                                                                                                                                                                                                                                                                                                                                                                                                                                                                                                                                                                                                                                                                                                                                                                                                                                                            |
| <p>40<br/>41<br/>42<br/>43<br/>44<br/>45<br/>46<br/>47<br/>48<br/>49<br/>50<br/>51<br/>52<br/>53<br/>54<br/>55<br/>56<br/>57<br/>58<br/>59<br/>60</p> <p><b>Final messages</b></p>                                                                       | <p>23. From your involvement in the demonstration project, what are the 3 things you want your hospital to keep in mind as genomics is implemented in clinical practice?</p> <p>24. Is there anything else you want to make sure the Alliance of organisations takes into account?</p>                                                                                                                                                                                                                                                                                                                                                                                                                                                                                                                                                                                                                                                                                                                                                                                                                                                                                                                                                                                  |

**Supplementary File 2: Stage 2a, Semi Structured Interview Schedule, Clinical Processes**

Could you tell me what your role is and how you have been involved with the use of genomics in the clinical setting?

|                                                                                                                                                                                                                                                                                               |                                                                            |
|-----------------------------------------------------------------------------------------------------------------------------------------------------------------------------------------------------------------------------------------------------------------------------------------------|----------------------------------------------------------------------------|
| <b>Ensuring appropriate patients receive exome sequencing</b><br>( <b>Emotion</b> , Reinforcement, Behavioural regulation)                                                                                                                                                                    | <b>Domain</b>                                                              |
| What measures are in place to assure yourself that you are selecting the appropriate patients?                                                                                                                                                                                                | Behavioural regulation                                                     |
| Is there anything in place that makes this process work well routinely?                                                                                                                                                                                                                       | Reinforcement                                                              |
| What were your experiences of starting off offering testing - how did you become more proficient? What helped (or would have helped)?<br>Have you always been comfortable offering genomic testing in your clinical practice?<br>What changed your mind?                                      | Skills, Beliefs about capabilities, Beliefs about consequences,<br>Emotion |
| What are your experiences of managing expectation?<br>How have you found this? What has made it easier?                                                                                                                                                                                       | Exploratory q from patient consultation<br>Emotion                         |
| <b>Test ordering and interpreting variants</b><br>( <b>Emotion</b> , Reinforcement)                                                                                                                                                                                                           | <b>Domain</b>                                                              |
| What do you see as your role in determining the pathogenicity of a variant and its clinical significance)? (Who's role is it, how do you feed in?)<br>What would you (or did you) need to participate in the curation process (if you feel this is part of your role)?                        | Skills and knowledge                                                       |
| There is a large focus on multidisciplinary variant interpretation meetings as a way of interpreting results. What works/doesn't work?<br>What interventions have been put in place to aid the way they work?<br>How would you find variant interpretation if these didn't exist?             | Reinforcement<br>Emotion                                                   |
| Final decision making around variant classification – is there a standard process in place?                                                                                                                                                                                                   | Reinforcement                                                              |
| <b>Providing results to patients. (Communicating results)</b><br>(Emotion, Goals, Optimism, <b>Reinforcement</b> , <b>Behavioural regulation</b> )                                                                                                                                            | <b>Domain</b>                                                              |
| Have there been (are you aware of) any issues around communicating results back to patients?<br>No: What has been put in place to ensure it worked well?<br>Yes: What has been challenging? What needs to be put in place to overcome this?                                                   | Exploratory                                                                |
| Has a routine process been established?<br>How do you manage this?                                                                                                                                                                                                                            | MAD, Behavioural regulation                                                |
| When results are uncertain how do you feel about feeding this back to the patient?<br>How would you support a less experienced doctor with this?<br>What gives you confidence that this process is being handled well?                                                                        | Emotion<br>Optimism                                                        |
| Has a routine process been put in place for reanalysis of results?<br>How do you feel about this?                                                                                                                                                                                             | Reinforcement<br>Emotion                                                   |
| <b>Incorporation into practice</b><br>(Emotion, <b>Reinforcement</b> )                                                                                                                                                                                                                        | <b>Domain</b>                                                              |
| What do you feel should be put in place (if anything) to incorporate genomic testing into standard clinical practice?<br>How could this be facilitated? (is there anything other than funding) that is needed?<br>How do we support people to change (attitudes, behaviours, habits, skills)? | Reinforcement                                                              |
| Are you happy to play a role in mainstreaming genomics?                                                                                                                                                                                                                                       | Emotion                                                                    |
| What sort of role do you envisage?                                                                                                                                                                                                                                                            | Prof ID                                                                    |
| How do you keep up with the evolving evidence base?                                                                                                                                                                                                                                           | Skills, knowledge                                                          |
| Is your organisation supportive of adopting genomics in clinical practice? In what way?                                                                                                                                                                                                       | Organisational Knowledge                                                   |
| Is there anybody (or any role) outside your organisation who is key to ensuring mainstreaming?                                                                                                                                                                                                | Prof role, environmental context                                           |
| For others starting out now, what advice would you give – maybe what you did or wish you had known?                                                                                                                                                                                           |                                                                            |

Are there any other barriers, maybe one you have overcome, that we haven't discussed and you would like to share?

### Supplementary File 3. Interview Schedule, Service Provision

Could you tell me what your role is and how you have been involved with the use of genomics in the clinical setting?

**Pre-adoption:** focus on factors *that could sway thinking* about adoption including amalgamation & dissemination of information

What got you interested in the idea of genomic testing being used in clinical practice?

Where do you look for information around the use of clinical genomics?  
And where would you look for more?

How do you go about deciding what information, about adopting genomics, into clinical practice has value?  
Are there any networks that you find more helpful than others?

**Adoption:** focus on factors that influence implementation and the *decision* to adopt

What was the key reason for deciding to adopt/invest genomics in this clinical setting?

What specific data did you need or would like to see, to support the decision to use genomics?

What have been the key factors to influence (fellow) physicians to participate in the use of genomic testing?

**Implementation:** focus on what facilitates implementation (including setting and systems)

What do you think makes it easier for some clinical areas to implement genomic testing?

What do you think makes it easier for some organisations to implement genomic testing?

How do you know if implementation has been successful?

In developing your (organisational) processes, what have you learnt about what can be changed and what is essential?

What have been the best strategies to enhance participation/engagement? (with clinicians and non clinical staff)

**Sustainability:** focus on getting into routine practice and spreading out into new areas

As a (clinical) leader how do you nurture those who are advocating for change in genomics?

What do you feel should be done (if anything) to facilitate the incorporation of genomic testing?

How do you keep up with the evolving evidence base?

How do you go about deciding what to disinvest in to bring in a new intervention

Do you feel you have a particular part to play in getting genomics incorporated into routine practice?

Who should facilitate mainstreaming?

What organisation and community influences would support greater sustainability?

How do you think genomic sequencing needs to be financed in the future to ensure sustainability?

What national and/or state networks can most effectively support sustainability?

What policies do you/would you find most helpful to support stable funding streams?

For others starting out now, what advice would you give – maybe what you did or wish you had known

Are there any other barriers, maybe one you have overcome, that we haven't discussed and you would like to share?

## Supplementary File 4: Co design guide for Focus Groups

### Clinical processes phase 1 focus group material 1

| Clinical processes target behaviour/area from process map and audit data | Barriers in context*^+       | TDF domain | Impact of barrier (high/moderate/low) | Ranking of barriers to target (1 being most important) |
|--------------------------------------------------------------------------|------------------------------|------------|---------------------------------------|--------------------------------------------------------|
| Target behaviour 1                                                       | Barrier from data synthesis  | XXX        |                                       |                                                        |
|                                                                          | Barrier from data synthesis  | XXX        |                                       |                                                        |
|                                                                          | Space for additional barrier |            |                                       |                                                        |
|                                                                          | Space for additional barrier |            |                                       |                                                        |

\*emerged from process mapping interviews ^emerged from clinical process interviews +emerged from service provision interviews

### Clinical processes phase 2 focus group material

| Clinical processes target behaviour/area from process map and audit data | Top barrier in context*^+ | TDF domain | Suggested intervention strategies*^+ | Behaviour change strategy represented | Likely impact of strategy (high/moderate/low) | Likely feasibility of strategy (difficult/possible) | Ranking of intervention strategy (1 being most favourable) |
|--------------------------------------------------------------------------|---------------------------|------------|--------------------------------------|---------------------------------------|-----------------------------------------------|-----------------------------------------------------|------------------------------------------------------------|
| Target behaviour 1                                                       | XXX                       |            | Ideas from data synthesis            | XXX                                   |                                               |                                                     |                                                            |
|                                                                          |                           |            | Ideas from data synthesis            | XXX                                   |                                               |                                                     |                                                            |
|                                                                          |                           |            | Space for more ideas                 |                                       |                                               |                                                     |                                                            |
|                                                                          |                           |            | Space for more ideas                 |                                       |                                               |                                                     |                                                            |

### Service provision phase 1 focus group material 1

| Service provision/policy target behaviour/area | Barriers in context*^+       | TSCi area | TDF domain | Impact of barrier (high/moderate/low) | Ranking of barriers to target (1 being most important) |
|------------------------------------------------|------------------------------|-----------|------------|---------------------------------------|--------------------------------------------------------|
| Target behaviour X                             | Barrier from data synthesis  |           | XXX        |                                       |                                                        |
|                                                | Barrier from data synthesis  |           | XXX        |                                       |                                                        |
|                                                | Space for additional barrier |           |            |                                       |                                                        |
|                                                | Space for additional barrier |           |            |                                       |                                                        |

\*emerged from process mapping interviews ^emerged from clinical process interviews +emerged from service provision interviews

Service provision phase 2 focus group material

| Service provision/policy target behaviour/area | Top barrier in context*^+ | TDF domain | Suggested intervention strategies*^+ | Behaviour change strategy represented | Likely impact of strategy (high/moderate/low) | Likely feasibility of strategy (difficult/possible) | Ranking of intervention strategy (1 being most favourable) |
|------------------------------------------------|---------------------------|------------|--------------------------------------|---------------------------------------|-----------------------------------------------|-----------------------------------------------------|------------------------------------------------------------|
| Target behaviour X                             | XXX                       |            | Ideas from data synthesis            | XXX                                   |                                               |                                                     |                                                            |
|                                                |                           |            | Ideas from data synthesis            | XXX                                   |                                               |                                                     |                                                            |
|                                                |                           |            | Space for more ideas                 |                                       |                                               |                                                     |                                                            |
|                                                |                           |            | Space for more ideas                 |                                       |                                               |                                                     |                                                            |

For peer review only

1  
2  
3  
4  
5  
6  
7  
8  
9  
10  
11  
12  
13  
14  
15  
16  
17  
18  
19  
20  
21  
22  
23  
24  
25  
26  
27  
28  
29  
30  
31  
32  
33  
34  
35  
36  
37  
38  
39  
40  
41  
42  
43  
44  
45  
46

# BMJ Open

## A transformative translational change programme to introduce genomics into healthcare: a complexity and implementation science study protocol

|                                 |                                                                                                                                                                                                                                                                                                                                                                                                                                                                                                                                                                                                                                                                                                                                                                                                                                                                                                                                                                                                                                                                                                    |
|---------------------------------|----------------------------------------------------------------------------------------------------------------------------------------------------------------------------------------------------------------------------------------------------------------------------------------------------------------------------------------------------------------------------------------------------------------------------------------------------------------------------------------------------------------------------------------------------------------------------------------------------------------------------------------------------------------------------------------------------------------------------------------------------------------------------------------------------------------------------------------------------------------------------------------------------------------------------------------------------------------------------------------------------------------------------------------------------------------------------------------------------|
| Journal:                        | <i>BMJ Open</i>                                                                                                                                                                                                                                                                                                                                                                                                                                                                                                                                                                                                                                                                                                                                                                                                                                                                                                                                                                                                                                                                                    |
| Manuscript ID                   | bmjopen-2018-024681.R1                                                                                                                                                                                                                                                                                                                                                                                                                                                                                                                                                                                                                                                                                                                                                                                                                                                                                                                                                                                                                                                                             |
| Article Type:                   | Protocol                                                                                                                                                                                                                                                                                                                                                                                                                                                                                                                                                                                                                                                                                                                                                                                                                                                                                                                                                                                                                                                                                           |
| Date Submitted by the Author:   | 21-Oct-2018                                                                                                                                                                                                                                                                                                                                                                                                                                                                                                                                                                                                                                                                                                                                                                                                                                                                                                                                                                                                                                                                                        |
| Complete List of Authors:       | Taylor, Natalie; Cancer Council, Cancer Research Division Best , Stephanie ; Australian Institute of Health Innovation, Centre for Healthcare Resilience and Implementation Science; Murdoch Childrens Research Institute, Australian Genomics<br>Martyn , Melissa ; Walter and Eliza Hall Institute of Medical Research, Melbourne Genomics Health Alliance ; Royal Children's Hospital Melbourne, Murdoch Children's Research Institute<br>Long , Janet; Australian Institute of Health Innovation, Centre for Healthcare Resilience and Implementation Science<br>North, Kathryn; Murdoch Childrens Research Institute, Australian Genomics ; Royal Children's Hospital Melbourne, Murdoch Children's Research Institute<br>Braithwaite, Jeffrey; Australian Institute of Health Innovation, Centre for Healthcare Resilience and Implementation Science ; Murdoch Childrens Research Institute, Australian Genomics<br>Gaff , Clara; Walter and Eliza Hall Institute of Medical Research, Melbourne Genomics Health Alliance ; University of Melbourne, Department of Paediatrics and Medicine |
| <b>Primary Subject Heading</b>: | Health services research                                                                                                                                                                                                                                                                                                                                                                                                                                                                                                                                                                                                                                                                                                                                                                                                                                                                                                                                                                                                                                                                           |
| Secondary Subject Heading:      | Genetics and genomics, Qualitative research, Research methods                                                                                                                                                                                                                                                                                                                                                                                                                                                                                                                                                                                                                                                                                                                                                                                                                                                                                                                                                                                                                                      |
| Keywords:                       | Genomics, complexity, implementation, behaviour change, sustainability, translation                                                                                                                                                                                                                                                                                                                                                                                                                                                                                                                                                                                                                                                                                                                                                                                                                                                                                                                                                                                                                |
|                                 |                                                                                                                                                                                                                                                                                                                                                                                                                                                                                                                                                                                                                                                                                                                                                                                                                                                                                                                                                                                                                                                                                                    |

SCHOLARONE™  
Manuscripts

1  
2  
3 1 **A transformative translational change programme to introduce genomics into healthcare: a**  
4 **complexity and implementation science study protocol**  
5  
6  
7  
8  
9

10 4 Authors:

11  
12 5 Natalie Taylor<sup>\*a</sup> – [natalie.taylor@nswcc.org.au](mailto:natalie.taylor@nswcc.org.au); (T: +61 2 9334 1974)  
13

14 6 Stephanie Best<sup>c,d</sup> – [Stephanie.best@mq.edu.au](mailto:Stephanie.best@mq.edu.au)  
15

16 7 Melissa Martyn<sup>b,e,f</sup> – [melissa.martyn@melbournegenomics.org.au](mailto:melissa.martyn@melbournegenomics.org.au)  
17

18 8 Janet C Long<sup>c</sup> – [janet.long@mq.edu.au](mailto:janet.long@mq.edu.au)  
19

20 9 Kathryn North<sup>e,d</sup> – [kathryn.north@mcri.edu.au](mailto:kathryn.north@mcri.edu.au)  
21

22 10 Jeffrey Braithwaite<sup>c,d</sup> – [jeffrey.braithwaite@mq.edu.au](mailto:jeffrey.braithwaite@mq.edu.au)  
23

24 11 Clara Gaff<sup>b,f</sup> – [clara.gaff@melbournegenomics.org.au](mailto:clara.gaff@melbournegenomics.org.au)  
25  
26  
27  
28  
29

30 13 *\* Corresponding author*

31  
32 14 *<sup>a</sup> Cancer Council New South Wales, 153 Dowling Street, Woolloomooloo, New South Wales 2011,*  
33  
34 *Australia*

35  
36 16 *<sup>b</sup> Melbourne Genomics Health Alliance, Walter and Eliza Hall Institute, Parkville, Australia*

37  
38 17 *<sup>c</sup> Centre for Healthcare Resilience and Implementation Science, Australian Institute of Health*  
39  
40  
41 *Innovation, Macquarie University, Sydney, Australia*

42  
43 19 *<sup>d</sup> Australian Genomics, Murdoch Children's Research Institute, Parkville, Australia*

44  
45 20 *<sup>e</sup> Murdoch Children's Research Institute, The Royal Children's Hospital, Parkville, Australia*

46  
47 21 *<sup>f</sup> Departments of Paediatrics and Medicine, University of Melbourne, Melbourne, Australia*  
48  
49  
50  
51  
52

53 23 **Word count: 6215**  
54  
55

### ABSTRACT

**Introduction:** Translating scientific advances in genomic medicine into evidence-based clinical practice is challenging. Studying the natural translation of genomics into ‘early-adopting’ health system sectors is essential. We will a) examine 29 health systems (Australian and Melbourne Genomics Health Alliance Flagships) integrating genomics into practice, and b) combine this learning to co-design and test an evidence-based generalisable toolkit for translating genomics into healthcare.

**Methods and analysis:** 29 Flagships integrating genomics into clinical settings are studied as complex adaptive systems to understand emergent and self-organising behaviours amongst interrelated actors and processes. The Effectiveness-Implementation Hybrid approach is applied to gather information on the delivery and potential for real-world implementation. Stages ‘1’ and ‘2a’ (representing Hybrid Model 1) are the focus of this protocol. The Translation Science to Population Impact (TScImpact) framework is used to study policy decisions and service provision, and the Theoretical Domains Framework (TDF) is used to understand individual level behaviour change; both frameworks are applied across Stages 1 and 2a.

Stage 1 synthesises interview data from 32 participants involved in developing the genomics clinical practice systems and approaches across five ‘demonstration-phase’ (early adopter) Flagships. In Stage 2a, stakeholders are providing quantitative and qualitative data on process mapping, clinical audits, uptake and sustainability (TScImpact), and psychosocial and environmental determinants of change (TDF). Findings will be synthesised before co-designing



1 an intervention toolkit to facilitate implementation of genomic testing. Study methods to  
2 simultaneously test the comparative effectiveness of genomic testing and the implementation  
3 toolkit (Stage 2b), and the refined implementation toolkit while simply observing the genomics  
4 intervention (Stage 3), are summarised.

5 **Ethics and dissemination:** Ethical approval has been granted. The results will be disseminated  
6 in academic forums and used to refine interventions to translate genomics evidence into  
7 healthcare. Non-traditional academic dissemination methods (e.g., change in guidelines or  
8 government policy) will also be employed.

9  
10 **Key words:** Genomics, complex adaptive systems, evidence based implementation, natural  
11 experiment, behaviour change, policy, sustainability, translation

### 12 13 **Strengths and limitations of this study**

14 Strengths and limitations of this study include:

- 15 • A naturalistic study of complex change for the application of genomics into the health system
- 16 • A novel methodological approach to the study of complexity that could be applied more  
17 widely
- 18 • An approach to understanding reality and how to generate the ideal for implementation
- 19 • A demonstration of how complexity principles can be incorporated into the application of  
20 behaviour change theory
- 21 • A challenging undertaking to consolidate multiple components of complexity into a  
22 generalisable implementation toolkit

## INTRODUCTION

Since the birth of the genomic era almost 15 years ago,<sup>1</sup> substantial efforts have focussed on developing laboratory based genomic sequencing capabilities and large scale sequencing studies to understand the significance of sequence variation on health. In recent years there has been an increasing focus on the application of this information in health care, for example to improve the diagnosis and/or treatment of disease. The complex and unpredictable nature of scientific advances, however, has exceeded the ability of health systems to establish what the ideal conditions, systems, and behaviours ought to be for using genomics in complex healthcare settings. Rather, iterative attempts to apply genomics within existing (often pre-genomics) clinical practice, generate emergent routines with varying levels of suitability, efficiency and sustainability. This *'real'* state of affairs is influencing the implementation of genomics into routine care in the absence of evidence based, *'ideal'* approaches. A lack of implementation science evidence is one of a long list of well documented challenges limiting the effective implementation of genomic research into complex healthcare systems.<sup>2</sup> A 2017 review highlighted the lag in evidence to support implementation, demonstrating that very few studies to date have: a) incorporated implementation science theoretical frameworks, sustainability measures, or capacity building, b) focussed on macro-level factors (e.g., health systems, policies, financing), and c) attempted to develop and evaluate evidence based strategies for enhancing the implementation of genomic medicine.<sup>3</sup>

1  
2  
3 1 The continuous adhoc, emergent and self organised translation modes manifesting within  
4  
5 2 complex health care systems, as they attempt to keep pace with the constant stream of new  
6  
7 3 genomic evidence, undoubtedly contribute to the challenges faced in designing protocols to  
8  
9 4 study and test approaches to implementation. Disentangling the way in which the actors in the  
10  
11 5 system (e.g., clinicians, patients, researchers, policymakers, planners and decision makers)  
12  
13 6 perceive, experience, and *naturally behave* under these real world complex conditions is crucial  
14  
15 7 for understanding the true adoption, impact, and likely sustainability of genomic testing. It is also  
16  
17 8 key to discovering the '*ideal*' and to designing real-world interventions to support the  
18  
19 9 implementation of long-term, cost-effective genomics policy and practice. Furthermore, it has  
20  
21 10 been argued that interventions to improve implementation of evidence into practice will be most  
22  
23 11 effective when developed by those with local 'expertise' and tacit knowledge,<sup>4-6</sup> but which take  
24  
25 12 account of evidence and external expertise.<sup>7 8</sup> In this paper, we outline a novel methodological  
26  
27 13 approach, using complexity science, translation, behaviour change frameworks, and co-design  
28  
29 14 between healthcare professionals and stakeholders, and implementation and behavioural  
30  
31 15 researchers, to study the integration of genomics into clinical practice as part of a national natural  
32  
33 16 experiment, and develop a generalisable, evidence based toolkit for implementation.

34  
35  
36  
37  
38  
39  
40 17 The Australian Genomics Health Alliance (Australian Genomics) is a national network of  
41  
42 18 state-based genomics initiatives, working together to translate genomic approaches into clinical  
43  
44 19 practice. In 2014, the Melbourne Genomics Health Alliance (Melbourne Genomics) commenced  
45  
46 20 a demonstration project, which laid the foundations for Australian Genomics, which was  
47  
48 21 awarded \$25M over five years (2016-2020). Together these Alliances have placed emphasis on  
49  
50 22 understanding, from a service level and clinical practice perspective, how genomic testing can be  
51  
52 23 implemented in health care. Their Flagship programs are central to achieving these insights. A

1  
2  
3 1 Flagship is a multidisciplinary clinical group (e.g., medical professionals, diagnostic laboratory  
4  
5 2 staff, genetics counsellors, etc.) working together, often across multiple hospital sites, to provide  
6  
7 3 genomic testing for defined clinical indications according to a broad framework.<sup>9</sup> From the  
8  
9 4 inception of the demonstration project in 2014 through to 2020, 29 Flagships will be evaluating  
10  
11 5 the use of genomics in clinical practice, across diverse clinical conditions (Figure 1), involving  
12  
13 6 specialists from at least 16 different health professional disciplines from up to 18 hospitals and 4  
14  
15 7 hospital laboratories across Australia. The first five Melbourne Genomics flagships have already  
16  
17 8 undergone a formal evaluation to assess the effectiveness of genomic sequencing for the  
18  
19 9 purposes of early detection, treatment and, where possible, prevention of major disease.<sup>10-13</sup>  
20  
21  
22  
23

24 10 There is an immediate need to understand the emergent service provision pathways and  
25  
26 11 clinical processes for genomic testing to ensure that its impact in widespread practice lives up to  
27  
28 12 the promise of the results of the Flagships<sup>12-14</sup> established under the auspices of a research  
29  
30 13 program. The Flagships exemplify a large scale attempt to integrate genomics into everyday  
31  
32 14 healthcare. Therefore, in addition to establishing the clinical validity and utility of genomics,  
33  
34 15 Flagships are perfectly positioned for a naturalistic experiment of the factors affecting the  
35  
36 16 successful implementation of genomics into the Australian healthcare system, and for testing the  
37  
38 17 impact of evidence based approaches to ensure sustained, effective use. Each Flagship represents  
39  
40 18 a complex adaptive system (CAS);<sup>15-17</sup> there are a number of complex features (e.g., emergent  
41  
42 19 behaviours, self-organisation, non-linear processes, co-evolution, behaviours at the edge of  
43  
44 20 chaos, nested systems, interconnectivity and networks, and simple rules which beget complex  
45  
46 21 behaviours)<sup>18-21</sup> within each of the participating Flagships, and interactions between their  
47  
48 22 component parts. As such, this research will use a complexity science lens, combined with  
49  
50 23 implementation science and behavioural approaches, to investigate and support the integration of  
51  
52  
53  
54  
55

1  
2  
3 1 genomics into the health system. Whilst the Flagships are distinguishable in form, with unique  
4  
5 2 structural and cultural characteristics, each has been established with a common underpinning  
6  
7 3 framework (Australian and Melbourne Genomics). Therefore, studying all 29 Flagships using a  
8  
9 4 common approach is invaluable, as this permits evidence based examination of their functioning  
10  
11 5 and outcomes.<sup>22</sup> It also provides insights into improvements in processes and procedures over  
12  
13 6 time, and enables comparison and, where appropriate, consolidation of findings across Flagships.  
14  
15 7 Uniquely, then, we are able to study each individual Flagship as a CAS and also identify  
16  
17 8 commonalities across them to produce generalisable knowledge to support the translation of  
18  
19 9 genomics evidence into practice.

20  
21  
22  
23  
24 10 There are three broad and interacting elements of complexity within a Flagship, or CAS,  
25  
26 11 model (Figure 2). First, '*clinical versus implementation effectiveness*': whilst attempting to test  
27  
28 12 the effectiveness of genomics in the clinical setting, the impact of the broader health system  
29  
30 13 (e.g., behaviours, resources, logistics, politics, etc.) can often distort what we come to understand  
31  
32 14 about the success of diagnostic testing and subsequent treatment decisions.<sup>23-25</sup> Determining,  
33  
34 15 through rigorous research designs, how best to work with these health system factors to  
35  
36 16 implement testing and treatment effectively is crucial.<sup>26</sup> Second, '*policy decisions and service*  
37  
38 17 *provision*': for the sustained and evidence-based use of clinically effective genomics, it is  
39  
40 18 important to identify which of the key resources needed for sound genomics practice are being  
41  
42 19 funded through the Melbourne Genomics/Australian Genomics program, and plan for the  
43  
44 20 commissioning of these resources once programmatic funding has ended. Furthermore,  
45  
46 21 organisational, local area, and national level policy decisions (relating to, for example, Medicare  
47  
48 22 funding, resourcing, management, de-implementation, etc.), are likely to be affected if genomic  
49  
50 23 practice is endorsed. Therefore, understanding and planning for the management of such changes  
51  
52  
53  
54  
55

1 will be key for successful long-term implementation.<sup>9</sup> Third, '*individual level behaviour*  
2 *change*': the implementation of genomics into clinical practice will inevitably require both  
3 clinical and administrative practice change.<sup>2 27</sup>

4         Sitting both within and across each of these three broad elements of complexity are key  
5 complexity principles, which include, behaviours at the edge of chaos (high variety and  
6 creativity; the boundary between chaos and order), self-organisation (constant reorganisation of  
7 hierarchies and behaviours to adapt to the environment), and emergence (random actions that  
8 eventually generate patterns which change behaviour and the system). Studying the emergent  
9 and self-organising behaviours within different Flagships throughout the continuous flux will be  
10 vital for both identifying which of these behaviours to embed,<sup>28</sup> and where support through  
11 evidence based implementation can be beneficial.<sup>20</sup> Furthermore, whilst we cannot study the  
12 elements and principles of complexity in isolation, using appropriate frameworks to understand  
13 them, and synthesising this information in a way that helps to understand both successful  
14 emergent behaviours and gaps in practice, is likely to facilitate more effective intervention  
15 development.<sup>29</sup>

16         To address the first element of complexity (*clinical versus implementation effectiveness*)  
17 the Effectiveness-Implementation Hybrid approach – a way of blending design components of  
18 clinical effectiveness and implementation research,<sup>26</sup> will be applied to the Flagships across the  
19 five year research program (see Figure 1). To summarise, first (the focus of this protocol) we will  
20 test a clinical intervention (in our case 'genomic testing') whilst gathering information on its  
21 delivery during the effectiveness trial and/or on its potential for implementation in a real world  
22 setting (Hybrid model 1); second we will test a clinical intervention and an  
23 implementation/intervention strategy simultaneously (Hybrid model 2); and finally an

1  
2  
3 1 implementation /intervention strategy will be tested while observing/gathering information on  
4  
5 2 the clinical intervention and related outcomes (Hybrid model 3).  
6

7  
8 3 Nested within the Hybrid Model 1 approach, the Translation Science to Population  
9  
10 4 Impact (TSci Impact)<sup>30</sup> framework will be used to study the second element of complexity  
11  
12 5 (*policy decisions and service provision*), and the Theoretical Domains Framework (TDF)<sup>8 31-35</sup>  
13  
14 6 will be used to study the third (*individual level behaviour change*). The TSci Impact framework  
15  
16 7 provides a systematic approach to investigate the complex processes and mechanisms through  
17  
18 8 which tested and proven interventions are integrated into practice and policy in a large scale and  
19  
20 9 sustainable way. This framework was designed with complexity (or 'systems') science in  
21  
22 10 mind,<sup>36-39</sup> to take into account the complex interrelationships between infrastructure and  
23  
24 11 contextual influences within and across translation phases, and promotes the study of complex  
25  
26 12 interactions within and across implementation systems. The TSci Impact framework favours and  
27  
28 13 facilitates the synthesis of information to understand clinical trial outcomes within organisational  
29  
30 14 settings, combined with community action research for rich accounts of how culture, context,  
31  
32 15 local decision making and history influence implementation of evidence based practice.<sup>30</sup>  
33  
34  
35  
36  
37

38 16 The TDF is a psychosocial and environmental framework of behaviour change that  
39  
40 17 enables reliable and valid identification of psychosocial and environmental barriers and  
41  
42 18 facilitators (e.g., motivation, emotions, resources, social influences) to practice change. A key  
43  
44 19 feature of the TDF includes the need to establish key target behaviours, and so as part of this  
45  
46 20 work and aligning with ideas drawn from complexity science, we will incorporate the  
47  
48 21 development of clinical process maps to understand the emergent, self-organising, and  
49  
50 22 networking behaviours within and between individuals in the system, and to establish the *ideal*  
51  
52 23 from the *reality*<sup>40 41</sup> as these Flagships initiate the foundations of genomics in their local setting.  
53  
54  
55

1  
2  
3 1 In addition, investigating facilitators of behaviour change (or intuitively derived interventions<sup>42</sup>)  
4  
5 2 allows for the naturalistic assessment of emergent and self-organised behaviours central to  
6  
7 3 complexity theory. Finally, the TDF has previously been successfully used to synthesise  
8  
9 4 determinants of behaviour and interventions collected using no prior framework, or alternative  
10  
11 5 frameworks.(e.g.,<sup>43 44 45</sup>) By studying Flagships as CASs, this work aims to identify common  
12  
13 6 features of these systems and networks. As such, this is an unrivalled opportunity to use the TDF  
14  
15 7 to synthesise the complexity across and within Flagships into a holistic implementation toolkit,  
16  
17 8 combining knowledge of successful emergent behaviours with strategies to address genomics  
18  
19 9 implementation problems in a targeted, standardised, and generalisable fashion.  
20  
21  
22  
23  
24  
25

## 26 11 **Aim and objectives**

27  
28 12 This paper provides an outline of a five year transformative translational change program, and  
29  
30 13 specific details for the initial two-year phase, to study and support the implementation of  
31  
32 14 genomic testing into routine healthcare in clinical, organisational and policy contexts across  
33  
34 15 Australia. The objectives of the first phase are to study Melbourne Genomics and Australian  
35  
36 16 Genomics Flagships to:

- 37  
38  
39 17 1) Understand the emergent and self-organising behaviours during the implementation of  
40  
41 18 genomic testing into practice
- 42  
43 19 2) Identify successful emergent behaviours and gaps in practice
- 44  
45 20 3) Synthesise this information using a theoretical framework
- 46  
47 21 4) Co-design, with clinicians, a foundation implementation toolkit to facilitate the  
48  
49 22 translation of genomic testing into clinical practice  
50  
51  
52  
53  
54  
55



## 1 **METHODS AND ANALYSIS**

### 2 **Context**

#### 3 Australian Healthcare and Genomics

4 The Australian public health system is accessible to the public for free or at a lower cost through  
5 Medicare (funded by tax). The private system includes health service providers that are owned  
6 and managed privately, such as private hospitals, specialist medical and allied health, and  
7 pharmacies. The national health insurance scheme funded by the Australian Government  
8 currently funds few genetic and no genomic sequencing (whole exome/whole genome) tests. The  
9 largest expenditure in health - almost 40% - is on public hospital care, which includes some  
10 specialist genetic services and is the responsibility of the state governments. Genetic/genomic  
11 testing is funded through State government health budgets with availability of tests and funding  
12 varying across State. Governance structures exist to enable coordinated action and response to  
13 matters of national significance, such as genomics, across all Australian governments. Australian  
14 Genomics was established based on a national call from the National Health and Medical  
15 Research Council (NHMRC) for research on the application of genomics within the Australian  
16 public health system. Melbourne Genomics is funded by the Victorian Department of Health to  
17 support the integration of genomics in the Victorian health care system. The implementation  
18 science component of this work is embedded in the overall planned research program.

#### 19 Flagships

20 Under the Melbourne Genomics and Australian Genomics program of research, each of the 29  
21 Flagships represents a test of the integration of genomics into the clinical settings within public  
22 hospital health care in parallel with usual (non-research funded) care, incorporating research  
23 consent processes into care processes delivered by genetic counsellors. The initial focus was on

1 five conditions (childhood syndromes, neuropathies, hereditary colorectal cancer, focal epilepsy,  
 2 acute myeloid leukaemia), with a total of 24 additional conditions planned for commencement  
 3 over the following 2-3 years (Figure 1). Given this is a test of diagnostic capability (which may  
 4 lead to more personalised treatment interventions, as opposed to being a treatment intervention in  
 5 of itself), it is possible to administer both usual investigations and the new investigation  
 6 (genomic sequencing) to the same patient. Both the yield of the test and the clinical decisions  
 7 resulting can be determined.<sup>46</sup> As such, as opposed to a randomised controlled trial, which is  
 8 both unnecessary and inequitable under the given circumstances, each flagship is incorporating  
 9 an extended version of a comparative effectiveness research (CER) design,<sup>47 48</sup> which adds the  
 10 assessment of clinical and patient utility to the standard CER health outcome measure.

11 The interrelated actors and processes manifesting as part of each Flagship represent a  
 12 CAS, as demonstrated by generic Flagship context examples of key CAS components in Table 1.  
 13 Flagships will, therefore, be studied as an individual CAS to understand the emergent and self-  
 14 organising behaviours. In addition, commonalities of integration across CASs will be studied to  
 15 support the development of an implementation framework for future real world healthcare  
 16 organisations planning to translate genomics into practice.

17 **Table 1. Flagships as CAS**

| CAS component                                         | Flagship example                                                                                                                                                                                                                                                                                                                                                                             |
|-------------------------------------------------------|----------------------------------------------------------------------------------------------------------------------------------------------------------------------------------------------------------------------------------------------------------------------------------------------------------------------------------------------------------------------------------------------|
| A large number of elements which interact dynamically | Key Flagship elements include patients (and their own influences outside the official health care system), staff (e.g., different professions, hierarchies, and approaches to decision making), locations (multiple sites, labs and clinicians not colocated), resources (time, money, etc.), organisations, leadership, clinical processes, research processes – all of which will interact |

|                                                                                   |                                                                                                                                                                                                                                                                                                                                                                                                                                                                                                                                                                                                                                                                                                                                                                                                                                                                                                                                                                                                                                                             |
|-----------------------------------------------------------------------------------|-------------------------------------------------------------------------------------------------------------------------------------------------------------------------------------------------------------------------------------------------------------------------------------------------------------------------------------------------------------------------------------------------------------------------------------------------------------------------------------------------------------------------------------------------------------------------------------------------------------------------------------------------------------------------------------------------------------------------------------------------------------------------------------------------------------------------------------------------------------------------------------------------------------------------------------------------------------------------------------------------------------------------------------------------------------|
| <p>Any element in the system is affected by and affects several other systems</p> | <p>For example, the flagship is operating within the broader CAS – incorporating new genomic investigations and procedures within existing patient care pathways, and evaluating the process and outcomes. This involves an iterative process affected by (and impacting) pre-existing clinical and laboratory systems for patient assessment, decision making and patient consent for the genetic diagnostic process, sign off, counselling, sampling, transit, batching, sequencing, computational access, analysis, interpretation, reporting, etc. Different professions interact throughout this process to make a final decision</p>                                                                                                                                                                                                                                                                                                                                                                                                                  |
| <p>Non linear interactions, so small changes can have large effects</p>           | <p>Whilst the pathway that must be taken to complete the process for any given genetic test is generally linear, the interactions within and between each stage are non-linear (e.g., within the decision about which test is most appropriate for a patient, there is formal and informal discussion between clinicians and clinical geneticists about the appropriateness of genomic testing and the area of focus required), and iterative (e.g., first analysis of the results may prompt re-examination of the clinical picture and alter decisions about the focus of the genomic analysis). Furthermore, the exploratory nature of Flagships under a research program introduces further ambiguity (e.g., around future funding or clinical utility of genomic testing in that condition)</p>                                                                                                                                                                                                                                                        |
| <p>Openness, so it may be difficult to define system boundaries</p>               | <p>As a broad example, the funding of resources for genomic sequencing within participating health services overlaps with existing government commissioned resources for a Flagship. As a research program operating in a real-world health system, this scenario may affect clinical decision making for patients due to boundaries stipulated in research protocols within which clinicians must operate</p> <p>A more specific example includes the uncertainty held regarding whether or not and when to communicate incidental findings to patients, and the ethical decision making behind undertaking secondary analysis of previously collected samples as new genes are discovered.</p> <p>Whilst new knowledge for patient diagnosis and treatment is a clear benefit from the continuously evolving basic and clinical research perspective, impact on practice can involve period of time where there is more ambiguity and uncertainty about what is best for patients. Policies help to define this but generate boundaries, which can be</p> |

|                                                                                                                                        |                                                                                                                                                                                                                                                                                                                                                                                                                                                           |
|----------------------------------------------------------------------------------------------------------------------------------------|-----------------------------------------------------------------------------------------------------------------------------------------------------------------------------------------------------------------------------------------------------------------------------------------------------------------------------------------------------------------------------------------------------------------------------------------------------------|
|                                                                                                                                        | frustrating, particularly if they are not up to date with new evidence. This can be where deviations arise and new, informal, unrecorded patterns emerge.                                                                                                                                                                                                                                                                                                 |
| A constant flow of energy to maintain the organisation of the system                                                                   | Flagships require all those involved in completing the diagnostic process to be on board, but as with any health system, perceptions of value of different parts of the process, including the outcome, can vary and evolve amongst both patients and professionals. This can affect the willingness to participate and the flow of energy in the system.                                                                                                 |
| A history whereby the past helps to shape present behaviour                                                                            | The involvement of genetics and genetic specialists in patient care differs across Flagships. The extent of this past involvement, and the nature of the relationships between disciplines and different locations, influences the introduction of genomics, specifically the protocols and procedures, as well as dynamics within a Flagship.                                                                                                            |
| Elements in the system are not aware of the behaviour of the system as a whole and respond only to what is available or known locally. | For example, Flagships are operating as externally funded entities within the existing health care system – individuals are well aware of the need for funding but not so much the need to disinvest; they are also primarily concerned with the operations and needs of their own Flagship(s). There are also other Flagships as well as the health system as a whole, which have different circumstances, and are having an impact/being impacted upon. |

## Research design

As part of the five year complexity-implementation science research plan, our design provides methodological details for the two stages used to investigate Hybrid Model 1: gathering information during the effectiveness trial (in this case an extended CER) of a clinical intervention on its potential for implementation in a real world situation. Stage 1, a data recoding exercise, has been completed and stage 2a is underway, collecting data across at least a further 6 project areas Flagships (see Figure 1). A summary of methods to be applied for the Hybrid

1 Model 2 and 3 are also provided. A Logic Model (Figure 3) presents the activities, outputs, and  
 2 outcomes of Stage 1 and 2a.

3 Participant identification and data analysis will involve an expert resource group of multi-  
 4 disciplinary research, clinical, and contextual expertise (Table 2) for interpretation and  
 5 clarification of findings, consisting of experienced clinicians and researchers, each bringing  
 6 academic and/or contextual knowledge from participating sites. The following section contains  
 7 details of participants and recruitment, data collection tools, research procedures and data  
 8 analysis plan for stage 1 (post flagship implementation) and stage 2a (pre, during and post  
 9 flagship implementation).

11 **Table 2: Expert Resource Group expertise**

| Expert identifier number | Genetic clinical expertise | Non Genetic Clinical expertise | Laboratory Expertise | Genetic Operational Knowledge | Implementation Science Expertise |
|--------------------------|----------------------------|--------------------------------|----------------------|-------------------------------|----------------------------------|
| 1                        | X                          |                                |                      | X                             |                                  |
| 2                        |                            |                                | X                    | X                             |                                  |
| 3                        |                            |                                | X                    | X                             |                                  |
| 4                        |                            |                                |                      |                               | X                                |
| 5                        |                            | X                              |                      |                               | X                                |
| 6                        |                            | X                              |                      |                               | X                                |

13 Stage 1: Hybrid Model 1; post-implementation (2015-2017 timeframe)

14 *Stage 1 Participants and recruitment*

15 Stage 1 builds on the work of the Melbourne Genomics evaluation team interviewing 32  
 16 clinicians across five Flagships in the demonstration phase. Individuals who were involved in  
 17 developing the systems and approaches [e.g., variant curation pipeline, variant classification  
 18 frameworks, consent forms and reporting templates for Whole Exome Sequencing (WES) etc.],  
 19 including genetic clinical specialists, and non genetic clinical specialists who attended more than

1 two multidisciplinary meetings over the demonstration phase, were invited to participate via  
2 email.

### 3 4 *Stage 1 Data collection tools*

5 ***Structured interview schedule (Supplementary file 1):*** The schedule was used to gather data  
6 retrospectively for the Melbourne Genomics evaluation from stakeholders in the demonstration  
7 phase. Questions focussed on aspects of the first implementation of WES into clinical practice:  
8 a) role in the project, b) experience (as a clinician or medical scientist), c) perceptions of multi-  
9 disciplinary variant meetings, d) views on policy decisions and procedures e) impact on their  
10 understanding, and f) factors affecting integration into practice. Probes for questions in each  
11 topic area are also provided for interviewers to maximise the quality of information gathered.

12 ***Evidence based interview coding tools:*** Whilst the data from these interviews was originally  
13 used to obtain insights into the ‘*what*’ of the flagship, additional tools have been selected to code  
14 these interviews from an evidence based, behavioural perspective. More specifically, TDF  
15 coding and behaviour change techniques guidance,<sup>31-33</sup> and agreed definitions of the TDF in the  
16 genomic context (see Table 3)<sup>49</sup> was used to: 1) identify behavioural areas for change, 2) group  
17 key barriers and enablers to implementation of genomic sequencing according to theoretical  
18 domains of behaviour change, to 3) capture any behaviour change techniques (BCTs)<sup>32</sup>  
19 represented in any existing or new intuitive intervention strategies described by participants.

20 **Table 3: Recoding Guide**

| TDF domain | TDF domain definition (Cane et al. 2012)   | Definition in context                                                                         |
|------------|--------------------------------------------|-----------------------------------------------------------------------------------------------|
| Knowledge  | An awareness of the existence of something | Clinicians’ actual awareness and understanding (through education/training) of the principles |

|                                          |                                                                                                                                                                                       |                                                                                                                                                                                                                                                             |
|------------------------------------------|---------------------------------------------------------------------------------------------------------------------------------------------------------------------------------------|-------------------------------------------------------------------------------------------------------------------------------------------------------------------------------------------------------------------------------------------------------------|
|                                          |                                                                                                                                                                                       | and process of offering genetic testing in clinical practice                                                                                                                                                                                                |
| Skills                                   | An ability or proficiency acquired through practice                                                                                                                                   | Clinicians' actual physical and psychological ability or proficiency acquired through actual practice (as opposed to education/training – cannot get skills through education) to make decisions whether or not to offer genetic testing in practice        |
| Memory, Attention and Decision Processes | The ability to retain information focus selectively on aspects of the environment and choose between two or more alternatives                                                         | Clinicians' ability to remember to consider genetic testing alongside other interventions for health risk identification, diagnosis, management, and therapy                                                                                                |
| Behavioural Regulation                   | Anything aimed at managing or changing objectively observed or measured actions                                                                                                       | Clinicians' self-created or self-imposed regulation to help make decisions about offering genetic tests                                                                                                                                                     |
| Social Influences                        | Those interpersonal processes that can cause individuals to change their thoughts, feelings, or behaviours                                                                            | Interpersonal interactions between professionals that can influence clinicians' thoughts, feelings or behaviours (ie anything in Motivation) regarding offering genetic testing                                                                             |
| Environmental Context and Resources      | Any circumstance of a person's situation or environment that discourages or encourages the development of skills and abilities independence, social competence and adaptive behaviour | Any external circumstance of a clinicians' situation or environment that discourages or encourages them to offer genetic testing in practice, including impacting the development of capability, motivation or social opportunity to offer genetic testing. |
| Social/Professional Role and Identity    | A coherent set of behaviours and displayed personal qualities of an individual in a social or work setting                                                                            | Clinicians' perceived professional role and identity in relation to offering genetic tests                                                                                                                                                                  |
| Beliefs about Capabilities               | Acceptance of the truth, reality or validity about ability, talent, or facility that a person can put to constructive use                                                             | Clinicians' perception about their own capability to consider genetic testing (terms used in literature: confidence, comfort, control)                                                                                                                      |
| Optimism                                 | The confidence that things will happen for the best or that desired goals will be attained                                                                                            | Clinicians' optimism or pessimism that genetic testing will be appropriately integrated into clinical practice and will improve healthcare generally                                                                                                        |
| Beliefs about Consequences               | Acceptance of the truth, reality, or validity about outcomes of a behaviour in a given situation                                                                                      | Clinicians' perceptions about the value of offering genetic testing in clinical practice – whether it is worthwhile in that it will improve                                                                                                                 |

|               |                                                                                                                                                                            |                                                                                                                                                                                                           |
|---------------|----------------------------------------------------------------------------------------------------------------------------------------------------------------------------|-----------------------------------------------------------------------------------------------------------------------------------------------------------------------------------------------------------|
|               |                                                                                                                                                                            | patient outcomes in their own practice (term used in literature: attitude)                                                                                                                                |
| Intentions    | A conscious decision to perform a behaviour or a resolve to act in a certain way                                                                                           | Clinicians' intentions to consider genetic testing                                                                                                                                                        |
| Goals         | Mental representations of outcomes or end states that an individual wants to achieve                                                                                       | Whether clinicians offering genetic testing is a priority within their practice                                                                                                                           |
| Reinforcement | Increasing the probability of a response by arranging a dependent relationship, or contingency, between the response and a given stimulus                                  | Incentives, rewards, sanctions, reinforcement at any level (eg patient satisfaction; better client health; economic incentives) that encourage or increase clinicians' decisions to offer genetic testing |
| Emotion       | A complex reaction pattern, involving experiential, behavioural, and physiological elements, by which the individual attempts to deal with a personally significant matter | Clinicians feelings when they consider genetic testing                                                                                                                                                    |

### Stage 1 Procedures

Two behavioural researchers independently recoded ten of the Melbourne Genomic evaluation interview data according to the TDF, then compared findings for inter-rater reliability. The remaining 22 interviews are being recoded by one researcher. Where there are differences or queries a TDF expert is being used to advise on the appropriate coding. Once complete the recoded data will be discussed with the expert resource group for sense checking.

### Stage 1 Data Analysis Plan

Interview data will be audio recorded, fully transcribed and entered into NVivo 11 (QSR International Pty Ltd., 2015). Analysis will vary dependent on the interview intent. The TDF



1 reanalysis of the Melbourne Genomic data will establish target behaviour areas and key barriers  
2  
3  
4  
5  
6  
7  
8  
9  
10  
11  
12  
13  
14  
15  
16  
17  
18  
19  
20  
21  
22  
23  
24  
25  
26  
27  
28  
29  
30  
31  
32  
33  
34  
35  
36  
37  
38  
39  
40  
41  
42  
43  
44  
45  
46  
47  
48  
49  
50  
51  
52  
53  
54  
55  
56  
57  
58  
59  
60

1 reanalysis of the Melbourne Genomic data will establish target behaviour areas and key barriers  
2 to focus on in subsequent interviews. The recoding process using the TDF will also allow  
3 identification of psychosocial domains within each target area. Domains not identified will be  
4 included in the stage 2a clinical process interviews to identify if they have relevance within each  
5 target area.

6  
7 Stage 2a: Hybrid Model 1 pre, during, and post implementation (2018-2019 timeframe)

8 *Stage 2a Participants and recruitment*

9 Two key participant groups, each of which will be recruited for one or more of the different  
10 interviews and focus groups will be drawn from the Australian and Melbourne Genomic  
11 Flagships. Given the focus on service provision and policy, and clinical process aspects of  
12 implementation, the target groups for participation represented these areas:

13 a) Service provision pathway participants: A total of 37 decision-makers and stakeholders  
14 (both clinical and administrative, playing a key role in either flagship leadership, funding and  
15 financing strategies, genomic testing characteristics and costs, organisational and community  
16 factors or policy) who have been identified as fulfilling the inclusion criteria across the flagships  
17 and states will be invited to participate in an interview.

18 b) Clinical process delivery participants: A total of 27 clinical non-genetics medical  
19 specialists (e.g., oncologists, neurologists,) who have been identified as fulfilling the inclusion  
20 criteria across the flagships and states will be invited to participate in an interview.

21  
22 Across both participant groups, up to 12 people will be invited to participate a focus group to be  
23 held in each state (i.e., Victoria, Tasmania, New South Wales, and South Australia, and

1 Westwern Australia). The participants invited will depend on the findings from the individual  
 2 interviews.

3 **Table 4: Stage 2a Interview Inclusion Criteria**

| <i>Service provision participant inclusion criteria</i>       |                                                                                                                                 |
|---------------------------------------------------------------|---------------------------------------------------------------------------------------------------------------------------------|
| <b>Inclusion Criteria</b>                                     | <b>Justification</b>                                                                                                            |
| Strategic decision makers or                                  | Involved with direction and funding for services including genomics                                                             |
| Service level managers or above (e.g. CEO) or                 | Will have either signed off on a flagship application, have a flagship running in their organisation, or be managing a flagship |
| Senior clinical geneticists                                   | Will have an overview of genomic testing in more than one flagship across clinical genetics and medical specialities            |
| Flagship involvement from any phase of implementation         | To gather views across the implementation journey                                                                               |
| Draw participants from a cross section of locations           | To ensure a broad representation of views                                                                                       |
| <i>Clinical processes participant inclusion criteria</i>      |                                                                                                                                 |
| <b>Inclusion Criteria</b>                                     | <b>Justification</b>                                                                                                            |
| Medical specialists (excluding clinical geneticists)          | Focus of study is mainstream tertiary implementation in the long term                                                           |
| AND working within a flagship                                 | Practitioner will have genomics knowledge                                                                                       |
| Flagship involvement from any phase of implementation         | To gather views across the implementation journey                                                                               |
| Working in Australian Genomics or Melbourne Genomics flagship | These are the sites for the genomic work                                                                                        |
| Draw participants from a cross section of locations           | To ensure a broad representation of views                                                                                       |

4  
 5 Selection criteria will be established (see Table 4) to facilitate recruitment of expert  
 6 informers for interview based on their experiences of implementation of genomics in their  
 7 organisation. Individuals fulfilling the inclusion criteria will be identified using the knowledge of

1 the expert resource group. Recruitment for individual interviews and focus groups will consist of  
2 multiple strategies, including making use of the networks of the expert resource group to  
3 facilitate research-participant contact; individual emails will be sent. Interview times and  
4 locations will be arranged based on convenience for interviewees to enhance the likelihood of  
5 participation.

### 6 7 *Stage 2a Data collection tools*

8 A process mapping guide (Figure 4), a clinical audit, two semi structured interview schedules  
9 (Supplementary File 2 and 3), and an intervention co-design guide (Supplementary File 4) will  
10 be used to gather qualitative and quantitative data.

11 ***Clinical process mapping template:*** informed by stage 1 interviews and the expert resource  
12 group, the template (Figure 4) will present an outline of the WES process to participants,  
13 covering a) the patient presenting at clinic, b) the process for analysis, and c) communication of  
14 results to patient. Each section will act as a prompt to clarify processes and an opportunity for  
15 participants to amend the outline process map in relation to processes specific to their clinical  
16 area (e.g., childhood syndromes, cancer, etc.) with regards to where processes begin and end,  
17 tasks involved, who contributes, who is affected, and where glitches occur in the system. This  
18 will enhance understanding as to how current clinical processes have emerged and are currently  
19 operating from a pre-, during-, and/or post-implementation of WES perspective. Furthermore,  
20 emergent barriers to implementation, and any current or suggested intervention strategies  
21 captured as part of these discussions will be noted.

22 ***Clinical practice audit tools:*** collects information about recorded practice prior to, during and  
23 post-implementation of genomic sequencing. Audit data will be collected to reflect key

1 components of the process map to demonstrate where gaps, blocks, and problems exist in the  
2 system. For example, date stamped data of the detailed patient journey from referral into WES,  
3 test ordering and interpretation, and communication of results to patients will be collected and  
4 matched to specific process map steps.

5 ***Clinical processes interview schedule:*** collects views from non-genetic clinical specialists on the  
6 early, mid and late phases of implementing a flagship. The interview schedule, informed by the  
7 results of the Stage 1 TDF-coded interviews, and informed by the Melbourne Genomics  
8 Community Advisory Group, is framed according to relevant TDF domains. Questions enquire  
9 about the same three key behavioural areas examined in the process map: a) the patient  
10 presenting at clinic, b) the process for analysis, and c) communication of results to patient. For  
11 example, in the third behavioural area, ‘communicating results,’ the question relating to the  
12 ‘emotion’ TDF domain is *When results are uncertain how do you feel about feeding this back to*  
13 *the patient?* And for the ‘optimism’ TDF domain; *What gives you confidence that this process is*  
14 *being handled well?*

15  
16 ***Service provision interview schedule:*** collects views from key decision makers and stakeholders  
17 on factors influencing the uptake of genomic medicine at different phases of implementation, and  
18 on preparing for the transition from flagship to ordinary clinical service status for the  
19 sustainability of genomic testing once programmatic funding has ended. Areas identified for  
20 exploration at interview were debated with the expert resource group, with Spoth et al’s (2013)  
21 TSci Impact framework being favoured for investigating translation phases of pre-adoption,  
22 adoption, implementation, and sustainability from a service provision and policy perspective.  
23 Some interviewees will need to reflect back on the early phases of pre adoption, while others will

1 be in the translation function so will be able to draw on current experiences. To facilitate  
2 interview participants' focus on the phase under discussion a graphic has been developed to use  
3 at interview (see Figure 5). Working through the translation phases, questions focus on the  
4 following topic areas: 1) gaining clinical genomic knowledge; 2) influences on the decision to  
5 adopt; 3) the impact of the organisational setting and health system; and 4) influences on  
6 sustainability including disinvestment.

7  
8 ***Barrier verification and intervention strategies co-design guide:*** This two-phase guide will  
9 present a summary of information gathered in the process mapping interviews and audit data  
10 cross-matching exercise, and the clinical processes and service provision interviews (across the  
11 respective associated behavioural/topic areas covered), synthesised according to the TDF  
12 domains and BCTs. In phase 1, prompts and materials (Supplementary File 4) will be provided  
13 to encourage discussion about the barriers list presented, to elicit information about any  
14 additional barriers, and to narrow down a list of key barriers to focus upon. In phase 2b, a  
15 provisional list of intervention strategies that could be used to address those barriers will be  
16 presented. Guidance will be provided to facilitate the design of any new interventions using  
17 BCTs. A matrix will be provided to facilitate ranking of the interventions according to feasibility  
18 and impact on the associated barriers and subsequent behavioural areas (Supplementary File 4).

19  
20 *Stage 2a procedures for interviews and pre-focus group data synthesis*

21 ***Generic interview procedure:*** Before commencing all interviews, the interviewer (SB) will go  
22 over consent procedures, provide a Participant Information Sheet, obtain permission to record the  
23 interview, and then record verbal consent. The interview, which is likely to last around 60

1 minutes, will be recorded using a digital recorder, then transcribed. All participants will be  
2 assigned a code (e.g. Participant CP/SL 1, 2 3 etc) and interviewees will only be identified via  
3 these codes. Digital audio files will be imported into the software Nvivo 11 (QSR International  
4 Pty Ltd., 2015) to facilitate analysis.

5 ***Process mapping interview and integration with audit data:*** Hard copies of outline process  
6 maps (Figure 4) will be handed to clinical process interviewees to prompt discussion about the  
7 process for that particular clinical area (e.g., paediatric rare diseases, cancer, etc.), inform  
8 refinements to the map, and elicit information about barriers and facilitators to undertaking the  
9 process. These data will be transferred into Microsoft Visio software; participants will be  
10 contacted via email, and asked to review their revised map and suggest any refinements. The  
11 provisional list of audit data collection variables will be finalised on the basis of the process map,  
12 collected via organisation electronic and/or paper based patient records, with relevant  
13 information cross-matched to specific parts of the process. The outputs of this stage of the  
14 project will be: a) a detailed, visual, and data-verified outline of clinical area-specific processes  
15 for genomic testing pathways, and b) a data-driven method of identifying key gaps or  
16 imperfections in the process, and c) a set of emergent barriers and existing or potential  
17 interventions for improvement of processes.

18 ***Clinical process:*** The TDF based interview schedule (see Supplementary File 2) will be used  
19 with clinical process interviewees to discuss, using the lens of a psychosocial and environmental  
20 theoretical framework, barriers and facilitators to implementation of genomics in clinical  
21 practice, and to elicit information about existing or potential interventions for improvement. The  
22 outputs from this data collection procedure will be information on TDF based barriers and  
23 emergent interventions.

1  
2  
3 1 ***Service provision and policy interviews:*** The TSci Impact framework based interview schedule  
4  
5 2 (see Supplementary File 3) will be used with service provision and policy interviewees to discuss  
6  
7 3 factors influencing the uptake of genomic medicine at different phases of implementation using  
8  
9 4 the lens of translating science into policy and services perspective. Outputs here will include,  
10  
11 5 data on policy and service provider factors affecting implementation pathway, and information  
12  
13 6 on emergent barriers and interventions.  
14  
15  
16  
17  
18

19 8 *Stage 2a Data-informed focus group schedule development and data collection*

20  
21 9 ***Preparation of focus group materials through synthesis of interview data:*** Data from the stage  
22  
23 10 1 recoding, and stage 2a process mapping/audit data, clinical process, and service provision  
24  
25 11 interviews will be synthesised by the expert resource group in preparation for the focus groups  
26  
27 12 (Supplementary File 4). For both clinical processes and service provision and policy, summary  
28  
29 13 tables will be developed with a set of key target areas for improvement, context specific barriers  
30  
31 14 and corresponding TDF domains, emergent intervention strategies alongside corresponding  
32  
33 15 BCTs, and instructions for ranking the likely impact and feasibility of intervention strategies.  
34  
35 16 Key barriers from all the clinical specialities will be combined to develop generalisable  
36  
37 17 interventions.  
38  
39  
40  
41

42 18 *Focus Groups (two phases):* The synthesised data will be used with a multidisciplinary group of  
43  
44 19 clinicians and service provision/policy decision makers to verify barriers and co-design  
45  
46 20 intervention strategies using both emergent and evidence based behaviour change approaches.  
47  
48 21 Using the materials from the data synthesis exercise, the discussion in phase 1 will be used to  
49  
50 22 verify and identify any additional barriers, and to rank barriers according to level of impact on  
51  
52 23 behavioural areas. Phase 2 discussions, informed by phase 1 and with a provisional list of  
53  
54  
55

1 intervention strategies, will be used to co-design interventions to address the high impact barriers  
2 to implementation using the most feasible and likely impactful intervention strategies. A  
3 hypothetical example mapping how the flow of data from interviews in stage 2a will flow to  
4 intervention design is provided in supplementary file 4.

#### 6 *Stage 2a Development of foundation implementation toolkit*

7 A draft implementation toolkit will be developed using the recorded and written focus group data  
8 to present intervention strategies to address key barriers to clinical processes and service  
9 provision implementation of genomics evidence into practice. Both interview/focus group  
10 participants, the expert resource group, and the Consumer Advisory groups of the Australian and  
11 Melbourne Genomics Health Alliances will be invited to review the contents of the first iteration  
12 of the genomics implementation toolkit.

#### 14 *Stage 2a Data Analysis Plan*

15 **Data Synthesis prior to focus groups:** Initial synthesis will be undertaken by SB. The process  
16 mapping and clinical audit data will be analysed for data on processes, individual interactions,  
17 data driven gaps (within the four target areas) and also emergent barriers and interventions.  
18 Clinical audit data analysis will consist of computation of descriptive statistics, proportions, and  
19 timeframes between steps in clinical processes. This information, where available, will be  
20 matched to the relevant steps in the process map to highlight gaps or bottlenecks. Clinical  
21 process interview data will be analysed deductively using the TDF to identify key domains  
22 representing barriers to change, and appropriate BCTs will be mapped to these domains as an  
23 evidence based approach to intervention strategy development.<sup>31-33</sup> Service provision interviews



1 will be thematically analysed and used to identify key areas for development of service provision  
2  
3  
4  
5  
6  
7  
8  
9  
10  
11  
12  
13  
14  
15  
16  
17  
18  
19  
20  
21  
22  
23  
24  
25  
26  
27  
28  
29  
30  
31  
32  
33  
34  
35  
36  
37  
38  
39  
40  
41  
42  
43  
44  
45  
46  
47  
48  
49  
50  
51  
52  
53  
54  
55  
56  
57  
58  
59  
60

1 will be thematically analysed and used to identify key areas for development of service provision  
2 planning. These data will also be analysed according to the TDF and BCTs to facilitate the  
3 combined approach to developing clinical process and service provision interventions for the two  
4 phase focus groups. These processes, barriers and intervention data within the target areas will be  
5 collated and shared with the expert resource group. The expert resource group will analyse these  
6 data and develop the focus group materials to demonstrate key reported barriers to and suggested  
7 intervention strategies for effective implementation of genomics in practice.

8 ***Focus group analysis:*** Individual focus group analysis will be undertaken using the TDF and  
9 BCTs to identify validated and new barriers to change, and BCTs, respectively. Results of this  
10 exercise from each focus group will be provisionally combined to generate the first iteration of  
11 the genomics implementation toolkit.

### 13 **Patient and Public Involvement**

14 The Stage 2a clinical processes interview schedule is informed by the results of the Stage 1 TDF-  
15 coded interviews. Patient and public involvement was sought from the Melbourne Genomics  
16 Community Advisory Group. Through a facilitated discussion the group identified their priorities  
17 areas for implementation and sustainable delivery of genomics (for example “how do you  
18 manage patient expectation?”) which were incorporated into the interview schedule. Findings  
19 from data collection will be discussed with the Consumer Advisory groups of the Australian and  
20 Melbourne Genomics Health Alliances and they will be invited to review the contents of the first  
21 iteration of the genomics implementation toolkit.

### 23 **ETHICS AND DISSEMINATION**

1  
2  
3 1 Ethical approval for this study has been granted by Melbourne Health HREC on November 3,  
4  
5 2 2017, as an amendment to the Melbourne Genomics approved protocol number:  
6  
7 3 HREC/13/MH/326. Governance approval has been provided by Australian Genomics and  
8  
9 4 Melbourne Genomics participating institutions.

10  
11  
12 5       Dissemination of results will be undertaken through traditional academic forums, but also  
13  
14 6 through the information generated through this research being used to refine and apply evidence  
15  
16 7 based and pragmatic interventions into health systems for the translation of genomics into  
17  
18 8 practice. In addition, the Translational Science Benefits Model (TSBM)<sup>50</sup> will be used to further  
19  
20 9 understand the actual and potential value of genomics to society, and open up further  
21  
22 10 opportunities for dissemination.  
23  
24  
25  
26  
27

## 28 12 **DISCUSSION**

29  
30  
31 13 In Australia, the majority of clinical genomic sequencing is currently funded through research  
32  
33 14 activities. Melbourne Genomics and Australian Genomics bridge the gap between research and  
34  
35 15 established clinical practice. They represent systematic national and state-based efforts to  
36  
37 16 integrate genomics into everyday healthcare. For the majority of Flagships and health  
38  
39 17 professionals working within them – many of whom are not experts in the field of genomics –  
40  
41 18 this is the first time genomic sequencing tests have been available to them ‘in real time’. Whilst  
42  
43 19 they are making efforts to incorporate this into their practice, it is impossible for clinicians –  
44  
45 20 genetic and non-genetic alike – to know what the ‘*ideal*’ is yet. Therefore, no precedent exists  
46  
47 21 for *effectively* implementing genomics into practice for numerous clinical conditions across  
48  
49 22 different contexts. The diversity of health professional disciplines, health care organisations,  
50  
51 23 clinical indications participating across the 29 Flagships (all of which are at different stages of  
52  
53  
54  
55

1 implementation and involve a mixture of early, mid, and late adopters), will realise the ultimate  
2 goal of this work: to establish the ‘*ideal*’ and develop a generalisable model of implementation  
3 that future organisations can apply and tailor to their local contexts. The planned work for the  
4 remainder of this project will determine the finer details of this model, but the vision is for an  
5 interactive, theoretically underpinned, continuously refined toolkit informed by real-world data.  
6 This approach will enable diverse healthcare organisations at any stage of implementation to  
7 tailor their context-driven approach based on tried and tested intervention strategies used to  
8 address key challenges experienced by others.

9         The detailed methods for the current body of work – stage 1 and 2a, forming the  
10 foundations of this transformative translational change program, have been presented here.  
11 Future work will then build on data and strategies developed as part of Hybrid Model 1. To  
12 summarise, Hybrid Model 2 (see Figure 1 - Stage 2b; 2019-2020 timeframe) will consist of a  
13 simultaneous test of the clinical effectiveness of genomic sequencing and the implementation  
14 toolkit concurrently<sup>26</sup> in new Flagships. Quantitative and qualitative measures for assessing  
15 implementation effectiveness will be explored and developed<sup>51</sup> (Figure 1). A formal, concurrent  
16 test of the clinical effectiveness of genomics and the implementation toolkit will be undertaken,  
17 allowing for a detailed analysis, distinction, and explanation of the complex factors associated  
18 with clinical versus implementation effectiveness. During this stage (and stage 3), the Standards  
19 for Reporting Implementation Studies (StaRI) Checklist<sup>52</sup> will be used to support the planning  
20 and reporting of intervention strategies and implementation effectiveness. These findings will be  
21 used to further refine the toolkit.

22         The final stage (Hybrid model 3) (see Figure 1 - Stage 3; 2020-2021 timeframe) will  
23 focus on testing the refined implementation toolkit while simply observing the genomics

1 intervention, and related outcomes.<sup>26</sup> Consolidating the earlier work, this stage will include real  
 2 world testing of the implementation toolkit (e.g., RCT; stepped wedge trial) against a  
 3 comparison, and/or with a standard roll out, with the aim of informing state and national policy  
 4 and decision making. Following recommendations by Curran and colleagues,<sup>26</sup> summative  
 5 outcomes – including adoption/uptake of the clinical intervention, process measures, and quality  
 6 measures – will be assessed using data collection tools and approaches specifically designed for  
 7 measuring implementation outcomes developed in Stage 2b<sup>51</sup> (see Figure 1). Furthermore, these  
 8 outcomes will be mapped against the TSBM<sup>50</sup> to demonstrate implementation outcomes across  
 9 clinical, community, economy and policy contexts – a hypothetical example of this is provided in  
 10 Table 5.

11  
 12 **Table 5: Translational Science Benefits Model applied to genomics context and**  
 13 **implementation outcomes**

| TSBM Domain                 | Potential Benefit                                                         | TSBM indicator                                                                             | Potential Proctor et al (2017) Implementation Outcome |
|-----------------------------|---------------------------------------------------------------------------|--------------------------------------------------------------------------------------------|-------------------------------------------------------|
| Clinical and medical        | Streamlining processes                                                    | Development of procedural guidelines                                                       | Acceptability<br>Adoption                             |
| Community and public health | Saving patients from unnecessary procedures<br>Reduces diagnostic odyssey | Decrease non essential tests ordered<br>Time to diagnosis                                  | Appropriateness<br>Fidelity<br>Feasibility            |
| Economic benefits           | Increase in genomic testing and reduction in non essential testing        | Tests ordered                                                                              | Implementation cost                                   |
| Policy and legislation      | Disinvest in unnecessary procedures                                       | Change in government and organisation policies to support increased use of genomic testing | Penetration<br>Sustainability                         |

14 This study is not without limitations. First, recoding interviews undertaken in 2015 as  
 15 part of Stage 1 may not remain entirely representative of stakeholder perceptions that exist at

1 present. However, these views may be representative of individuals based at new sites which  
2 have not yet been exposed to genomic sequencing. Further to this, interview data from Stage 1a  
3 are being coded retrospectively using the TDF. While this will allow for identification of the  
4 issues most salient to interviewees, using the TDF to inform the interview schedule may have  
5 elicited information about barriers that are less spontaneously reported.<sup>53</sup> Moving forward  
6 beyond the original interviews, however, interview schedules have been designed based on the  
7 TDF; this will not only enhance the evidence based by which information is collected, but may  
8 also allow for a comparison of answers provided by participants using both interview  
9 approaches. Finally, the study is based on the implementation of genomics into the Australian  
10 health system which, like any health system globally, has a unique composition and combination  
11 of idiosyncrasies in terms of infrastructure and funding. However, the varied nature of the  
12 Australian system (e.g., the combined private/public system) has its benefits in that it bares some  
13 resemblance with countries that have publicly funded (e.g., UK, Canada), but also with those  
14 operating insurance based funding (e.g., Germany, USA).the novel approach taken here aims to  
15 enable the ability to identify generalisable interventions for addressing common challenges  
16 across contexts.

17 This is the first nationally based real-world study of a large cohort of CASs, deliberately  
18 attempting to integrate genomics into a real world, complex health system. To study and support  
19 implementation of a technology with far-reaching consequences but currently limited evidence  
20 base, we have developed a novel methodological approach consisting of complexity science,  
21 policy and service provision, and individual level behaviour change frameworks, and  
22 progressively more rigorous research designs. Disentangling clinical research processes from  
23 those which support adoption of a new standard of care, our work will provide streamlined

1 recommendations for future healthcare organisations planning to translate genomics into their  
2 health system. This methodology may be one that lends itself to study and support the adoption  
3 of other potentially ‘paradigm shifting’ technologies.

## 5 LIST OF ABBREVIATIONS

|    |             |                                          |
|----|-------------|------------------------------------------|
| 6  | BCT         | Behaviour change technique               |
| 7  | CAS         | Complex adaptive system                  |
| 8  | TDF         | Theoretical Dmains Framework             |
| 9  | TSci Impact | Translation Science to Population Impact |
| 10 | TSBM        | Translational Science Benefits Model     |
| 11 | WES         | Whole Exome Sequencing                   |

## 13 REFERENCES

- 14 1. Guttmacher AE, Collins FS. Welcome to the Genomic Era. *New England Journal of Medicine*  
15 2003;349(10):996-98. doi: 10.1056/NEJMe038132
- 16 2. Khoury MJ. No shortcuts on the long road to evidence-based genomic medicine. *JAMA*  
17 2017;318(1):27-28. doi: 10.1001/jama.2017.6315
- 18 3. Roberts MC, Kennedy AE, Chambers DA, et al. The current state of implementation science in  
19 genomic medicine: opportunities for improvement. *Genetics In Medicine* 2017;19:858.  
20 doi: 10.1038/gim.2016.210
- 21 4. Bosk CL, Dixon-Woods M, Goeschel CA, et al. Reality check for checklists. *The Lancet*  
22 2009;374(9688):444-45.
- 23 5. Øvretveit JC, Shekelle PG, Dy SM, et al. How does context affect interventions to improve  
24 patient safety? An assessment of evidence from studies of five patient safety practices and  
25 proposals for research. *BMJ quality & safety* 2011;20(7):604-10.

- 1  
2  
3 1 6. Leistikow IP, Kalkman CJ, de Bruijn H. Why patient safety is such a tough nut to crack. *BMJ:*  
4  
5 2 *British Medical Journal (Online)* 2011;342
- 6  
7 3 7. Greenhalgh T, Robert G, Macfarlane F, et al. Storylines of research in diffusion of innovation:  
8  
9 4 a meta-narrative approach to systematic review. *Social science & medicine*  
10 5 2005;61(2):417-30.
- 11  
12 6 8. Taylor N, Lawton R, Slater B, et al. The demonstration of a theory-based approach to the design  
13 7 of localized patient safety interventions. *Implementation Science* 2013;8(1):123. doi:  
14 8 10.1186/1748-5908-8-123
- 15  
16 9 9. Gaff CL, Winship I, Forrest S, et al. Preparing for genomic medicine: a real world demonstration  
17 10 of health system change. *Nature Partner Journals genomic medicine* 2017;2(1):16. doi:  
18 11 10.1038/s41525-017-0017-4
- 19  
20 12 10. Stark Z, Schofield D, Alam K, et al. Prospective comparison of the cost-effectiveness of  
21 13 clinical whole-exome sequencing with that of usual care overwhelmingly supports early  
22 14 use and reimbursement. *Genetics In Medicine* 2017;19:867. doi: 10.1038/gim.2016.221
- 23  
24 15 11. Walsh M, Bell KM, Chong B, et al. Diagnostic and cost utility of whole exome sequencing in  
25 16 peripheral neuropathy. *Annals of Clinical and Translational Neurology* 2017;4(5):318-25.  
26 17 doi: 10.1002/acn3.409
- 27  
28 18 12. Perucca P, Scheffer IE, Harvey AS, et al. Real-world utility of whole exome sequencing with  
29 19 targeted gene analysis for focal epilepsy. *Epilepsy Research* 2017;131:1-8. doi:  
30 20 10.1016/j.eplesyres.2017.02.001
- 31  
32 21 13. Tan T, Dillon O, Stark Z, et al. Diagnostic impact and cost-effectiveness of whole-exome  
33 22 sequencing for ambulant children with suspected monogenic conditions. *JAMA Pediatrics*  
34 23 2017;171(9):855-62. doi: 10.1001/jamapediatrics.2017.1755
- 35  
36 24 14. Stark Z, Schofield D, Martyn M, et al. Does genomic sequencing early in the diagnostic  
37 25 trajectory make a difference? A follow-up study of clinical outcomes and cost-  
38 26 effectiveness. *Genetics in Medicine* 2018 doi: 10.1038/s41436-018-0006-8
- 39  
40 27 15. Kannampallil TG, Schauer GF, Cohen T, et al. Considering complexity in healthcare systems.  
41 28 *Journal of biomedical informatics* 2011;44(6):943-47.
- 42  
43 29 16. Kuziemy C. Decision-making in healthcare as a complex adaptive system. *Healthcare*  
44 30 *Management Forum* 2016;29(1):4-7. doi: 10.1177/0840470415614842

- 1  
2  
3 1 17. Braithwaite J, Clay-Williams R, Nugus P, et al. Healthcare as a complex adaptive system. In:  
4  
5 2 Hollnagel E, Braithwaite J, Wears R, eds. *Resilient Health Care*. Oxon, UK: Ashgate 2013.
- 6  
7 3 18. Ellis B, Herbert S. Complex adaptive systems (CAS): an overview of key elements,  
8  
9 4 characteristics and application to management theory. *Journal of Innovation in Health  
10  
11 5 Informatics* 2011;19(1):33-37.
- 12  
13 6 19. Benham-Hutchins M, Clancy TR. Social networks as embedded complex adaptive systems.  
14  
15 7 *Journal of Nursing Administration* 2010;40(9):352-56. doi:  
16  
17 8 10.1097/NNA.0b013e3181ee42bc
- 18  
19 9 20. The Health Foundation. Evidence scan: Complex adaptive systems. London, 2010.
- 20  
21 10 21. Braithwaite J, Churrua K, Ellis LA, et al. Complexity Science in Healthcare – aspirations,  
22  
23 11 approaches, applications and accomplishments: A White Paper: Australian Institute of  
24  
25 12 Health Innovation, Macquarie University 2017.
- 26  
27 13 22. Sperber NR, Carpenter JS, Cavallari LH, et al. Challenges and strategies for implementing  
28  
29 14 genomic services in diverse settings: experiences from the Implementing GeNomics In  
30  
31 15 pracTicE (IGNITE) network. *BMC Medical Genomics* 2017;10(1):35. doi:  
32  
33 16 10.1186/s12920-017-0273-2
- 34  
35 17 23. Glasgow RE, Lichtenstein E, Marcus AC. Why don't we see more translation of health  
36  
37 18 promotion research to practice? Rethinking the efficacy-to-effectiveness transition.  
38  
39 19 *American Journal of Public Health* 2003;93(8)
- 40  
41 20 24. Stetler CB, Legro MW, Wallace CM, et al. The Role of Formative Evaluation in  
42  
43 21 Implementation Research and the QUERI Experience. *Journal of General Internal  
44  
45 22 Medicine* 2006;21(Suppl 2):S1-S8. doi: 10.1111/j.1525-1497.2006.00355.x
- 46  
47 23 25. Stetler CB, Mittman BS, Francis J. Overview of the VA Quality Enhancement Research  
48  
49 24 Initiative (QUERI) and QUERI theme articles: QUERI Series. *Implementation science*  
50  
51 25 2008;3:8-8. doi: 10.1186/1748-5908-3-8
- 52  
53 26 26. Curran GM, Bauer M, Mittman B, et al. Effectiveness-implementation hybrid designs:  
54  
55 27 combining elements of clinical effectiveness and implementation research to enhance  
56  
57 28 public health impact. *Medical care* 2012;50(3):217.



- 1  
2  
3 1 27. Michie S, Johnston M, Abraham C, et al. Making psychological theory useful for implementing  
4 evidence based practice: a consensus approach. *Quality & safety in health care*  
5 2 2005;14(1):26-33. doi: 10.1136/qshc.2004.011155  
6 3  
7 8  
8 4 28. Hasan H. Applying principles of Complexity Theory in practice. In: Hasan H, ed. Being  
9 Practical with Theory: A Window into Business Research. Wollongong, Australia: Faculty  
10 5 of Business, University of Wollongong 2014:148-50.  
11 6  
12 7 29. Paina L, Peters DH. Understanding pathways for scaling up health services through the lens of  
13 8 complex adaptive systems. *Health Policy and Planning* 2012;27(5):365-73. doi:  
14 9 10.1093/heapol/czr054  
15 10 30. Spoth R, Rohrbach LA, Greenberg M, et al. Addressing core challenges for the next generation  
16 11 of type 2 translation research and systems: the translation science to population impact  
17 12 (TSci Impact) framework. *Prevention Science* 2013;14(4):319-51. doi: 10.1007/s11121-  
18 13 012-0362-6  
19 14 31. Michie S, van Stralen MM, West R. The behaviour change wheel: A new method for  
20 15 characterising and designing behaviour change interventions. *Implementation Science*  
21 16 2011;6(1):42. doi: 10.1186/1748-5908-6-42  
22 17 32. Michie S, Richardson M, Johnston M, et al. The Behavior Change Technique Taxonomy (v1)  
23 18 of 93 Hierarchically Clustered Techniques: Building an International Consensus for the  
24 19 Reporting of Behavior Change Interventions. *Annals of Behavioral Medicine*  
25 20 2013;46(1):81-95. doi: 10.1007/s12160-013-9486-6  
26 21 33. Cane J, O'Connor D, Michie S. Validation of the theoretical domains framework for use in  
27 22 behaviour change and implementation research. *Implementation Science* 2012;7(1):37. doi:  
28 23 10.1186/1748-5908-7-37  
29 24 34. Taylor N, Lawton R, Moore S, et al. Collaborating with front-line healthcare professionals: the  
30 25 clinical and cost effectiveness of a theory based approach to the implementation of a  
31 26 national guideline. *BMC Health Services Research* 2014;14(1):1-10. doi: 10.1186/s12913-  
32 27 014-0648-4  
33 28 35. Taylor N, Long J, Debono D, et al. Achieving behaviour change for detection and management  
34 29 of Lynch syndrome using the Theoretical Domains Framework Implementation (TDFI)

- 1  
2  
3 1 approach: a study protocol. *BMC Health Services Research* 2016;16:89. doi:  
4 10.1186/s12913-016-1331-8  
5 2  
6  
7 3 36. Valente TW. Social networks and health: Models, methods, and applications. New York:  
8 Oxford University Press 2010.  
9 4  
10 5 37. Czaja SJ, Schulz R, Lee CC, et al. A methodology for describing and decomposing complex  
11 psychosocial and behavioral interventions. *Psychology and aging* 2003;18(3):385. doi:  
12 10.1037/0882-7974.18.3.385  
13 7  
14  
15 8 38. Czaja SJ, Nair SN. Human factors engineering and systems design. In: Salvendy G, ed.  
16 Handbook of Human Factors and Ergonomics. Third ed: John Wiley & Sons 2006:32-49.  
17 9  
18 10 39. Valente TW, Chou CP, Pentz MA. Community coalitions as a system: effects of network  
19 change on adoption of evidence-based substance abuse prevention. *American Journal of*  
20 *Public Health* 2007;97(5):880-86.  
21 11  
22 12  
23 13 40. Barach P, Johnson J. Understanding the complexity of redesigning care around the clinical  
24 microsystem. *Quality & Safety in Health Care* 2006;15(suppl 1):i10-i16. doi:  
25 10.1136/qshc.2005.015859  
26 14  
27 15  
28 16 41. Graham ID, Logan J, Harrison MB, et al. Lost in knowledge translation: time for a map?  
29 *Journal of continuing education in the health professions* 2006;26(1):13-24.  
30 17  
31 18 42. Davidoff F, Dixon-Woods M, Leviton L, et al. Demystifying theory and its use in  
32 improvement. *BMJ Quality & Safety* 2015 doi: 10.1136/bmjqs-2014-003627  
33 19  
34 20 43. Little EA, Pesseau J, Eccles MP. Understanding effects in reviews of implementation  
35 interventions using the Theoretical Domains Framework. *Implementation Science*  
36 2015;10(1):90. doi: 10.1186/s13012-015-0280-7  
37 21  
38 22 44. McSherry LA, Dombrowski SU, Francis JJ, et al. 'It's a can of worms': understanding primary  
39 care practitioners' behaviours in relation to HPV using the theoretical domains framework.  
40 *Implementation Science* 2012;7(1):73. doi: 10.1186/1748-5908-7-73  
41 23  
42 24 45. Heslehurst N, Newham J, Maniatopoulos G, et al. Implementation of pregnancy weight  
43 management and obesity guidelines: a meta-synthesis of healthcare professionals' barriers  
44 and facilitators using the Theoretical Domains Framework. *Obesity Reviews*  
45 2014;15(6):462-86.  
46 26  
47 27  
48 28  
49 29  
50  
51  
52  
53  
54  
55  
56  
57  
58  
59  
60

- 1  
2  
3 1 46. Sox HC, Greenfield S. Comparative effectiveness research: A report from the institute of  
4 2 medicine. *Annals of Internal Medicine* 2009;151(3):203-05. doi: 10.7326/0003-4819-151-  
5 3-200908040-00125  
6 3  
7 47. Phillips KA, Deverka PA, Sox HC, et al. Making genomic medicine evidence-based and  
8 4 patient-centered: a structured review and landscape analysis of comparative effectiveness  
9 5 research. *Genetics in Medicine* 2017;19(10):1081–91. doi: 10.1038/gim.2017.21  
10 6  
11 48. Stark Z, Lunke S, Brett GR, et al. Meeting the challenges of implementing rapid genomic  
12 7 testing in acute pediatric care. *Genetics in Medicine* 2018 doi: 10.1038/gim.2018.37  
13 8  
14 49. Paul G, MGenCouns HL, Trainer AH, et al. A theory-informed systematic review of clinicians’  
15 9 genetic testing practices. *Preparing to submit to the European Journal of Genetics in*  
16 10 preparation  
17 11  
18 50. Luke DA, Sarli CC, Suiter AM, et al. The Translational Science Benefits Model: A New  
19 12 Framework for Assessing the Health and Societal Benefits of Clinical and Translational  
20 13 Sciences. *Clin Transl Sci* 2018;11(1):77-84. doi: 10.1111/cts.12495  
21 14  
22 51. Proctor E, Silmere H, Raghavan R, et al. Outcomes for Implementation Research: Conceptual  
23 15 Distinctions, Measurement Challenges, and Research Agenda. *Administration and Policy*  
24 16 *in Mental Health and Mental Health Services Research* 2011;38(2):65-76. doi:  
25 17 10.1007/s10488-010-0319-7  
26 18  
27 52. Pinnock H, Barwick M, Carpenter CR, et al. Standards for Reporting Implementation Studies  
28 19 (StaRI) Statement. *BMJ* 2017;356 doi: 10.1136/bmj.i6795  
29 20  
30 53. Dyson J, Lawton R, Jackson C, et al. Does the use of a theoretical approach tell us more about  
31 21 hand hygiene behaviour? The barriers and levers to hand hygiene. *Journal of Infection*  
32 22 *Prevention* 2011;12(1):17-24.  
33 23  
34 24  
35  
36  
37  
38  
39  
40  
41  
42  
43  
44  
45  
46

## 25 **AUTHORS’ CONTRIBUTIONS**

26 NT conceived, designed and developed the detail of the study, provided advice for ethical  
27 approval, led and coordinated writing the paper. SB developed the detail of the study design, co-  
28 led the ethical approval and co-led writing the paper. MM conceived and co-designed the study

1 details, led the ethical approval process, and reviewed the paper. JCL co-designed the study details,  
2 provided advice for ethical approval and reviewed the paper. KN is the Chief Investigator for the  
3 Australian Genomics Health Alliance NHMRC grant; she contributed to conception of the study,  
4 provided strategic input and reviewed the paper. JB contributed to conception of the study,  
5 provided advice, strategic input and expertise in implementation and complexity science, and  
6 reviewed the paper. CG conceived and co-designed the study, provided advice, strategic input and  
7 reviewed the paper. All authors read and approved the final manuscript. KN, CG and JB are chief  
8 investigators on the National Health and Medical Research Council grant funding the Australian  
9 Genomics Health Alliance.

10

## 11 **FUNDING STATEMENT**

12 The Melbourne Genomics Health Alliance is funded by the Victorian Government and the ten  
13 Alliance members (Royal Melbourne Hospital, Royal Children's Hospital, the University of  
14 Melbourne, Waltear and Eliza Hall Institute, Murdoch Children's Research Institute,  
15 Commonwealth Scientific and Industrial Research Organisation, Australian Genome Research  
16 Facility, Peter MacCallum Cancer Centre, Austin Health, Monash Health). The Australian  
17 Genomics Health Alliance is funded by NHMRC grant 1113531.

18

## 19 **COMPETING INTERESTS STATEMENT**

20 NT, SB, MM, JCL, KN, JB, CG have declared that no competing interests exist.

21

1  
2  
3 **1 Tables, Figures and Additional Files**  
4  
5

6 **2 Tables**  
7

8 3 Table 1: Flagships as CASs  
9

10 4 Table 2: Expert Resource Group expertise  
11

12 5 Table 3: Recoding Guide in text  
13

14 6 Table 4: Stage 2a Interview Inclusion Criteria  
15

16 7 Table 5: Translational Science Benefits Model applied to genomics context and implementation  
17  
18  
19 outcomes  
20  
21

22 **9 Figures**  
23

24 10 Figure 1: Implementation Research Plan  
25

26 11 Figure 2: Frameworks to manage Complexity  
27

28 12 Figure 3: Logic Model  
29

30 13 Figure 4: Process Mapping Guide  
31

32 14 Figure 5: Service Provision Interview Translation Phases Graphic  
33  
34

35 **15 Supplementary Files**  
36

37 16 Supplementary File 1: Stage 1 Evaluation Structured Interview Schedule  
38

39 17 Supplementary File 2: Stage 2a, Semi Structured Interview Schedule, Clinical Processes  
40

41 18 Supplementary File 3: Stage 2a, Semi Structured Interview Schedule Service Provision  
42

43 19 Supplementary File 4: Co design guide for Focus Groups with hypothetical intervention mapping  
44  
45 scenario  
46

47 21  
48  
49  
50  
51  
52  
53  
54  
55  
56  
57  
58  
59  
60

| 2017                                                                                                                                                                                                                                                                                                                                                                                                                                                                                                                                                                                                                                                                                                                                                                               | 2018                                                                                                                                                                                                                                                                                                                                                                                                                                                                                                                                                                                                                                                                                                                                                                                                                                                                                                                                                                                                                                                                                                                        | 2019                                                                                                                                                                                                                                                                                                                                                                                                                                                                                                                                                                                                                                                                                                                                                                                                     | 2020                                                                                                                      | 2021                                                                                                                                                                                                                                                                                                                                                                                                                                                                                                                                                                                                                                                                                                                                                                                                                                                                                                                                                          |
|------------------------------------------------------------------------------------------------------------------------------------------------------------------------------------------------------------------------------------------------------------------------------------------------------------------------------------------------------------------------------------------------------------------------------------------------------------------------------------------------------------------------------------------------------------------------------------------------------------------------------------------------------------------------------------------------------------------------------------------------------------------------------------|-----------------------------------------------------------------------------------------------------------------------------------------------------------------------------------------------------------------------------------------------------------------------------------------------------------------------------------------------------------------------------------------------------------------------------------------------------------------------------------------------------------------------------------------------------------------------------------------------------------------------------------------------------------------------------------------------------------------------------------------------------------------------------------------------------------------------------------------------------------------------------------------------------------------------------------------------------------------------------------------------------------------------------------------------------------------------------------------------------------------------------|----------------------------------------------------------------------------------------------------------------------------------------------------------------------------------------------------------------------------------------------------------------------------------------------------------------------------------------------------------------------------------------------------------------------------------------------------------------------------------------------------------------------------------------------------------------------------------------------------------------------------------------------------------------------------------------------------------------------------------------------------------------------------------------------------------|---------------------------------------------------------------------------------------------------------------------------|---------------------------------------------------------------------------------------------------------------------------------------------------------------------------------------------------------------------------------------------------------------------------------------------------------------------------------------------------------------------------------------------------------------------------------------------------------------------------------------------------------------------------------------------------------------------------------------------------------------------------------------------------------------------------------------------------------------------------------------------------------------------------------------------------------------------------------------------------------------------------------------------------------------------------------------------------------------|
| <p><b>Hybrid Model 1:</b> Testing a clinical intervention whilst gathering information on its delivery during the effectiveness trial and/or on its potential for implementation in a real world situation<br/><i>(Curran et al., 2012)</i></p> <p><b>STAGE 1: Hybrid Model 1</b><br/><i>Genomic testing clinical processes and practice implementation research</i><br/>Recode existing interview data to reveal key decision parts in genomic testing (e.g. patient selection, using result in critical management), and key barriers according to the Theoretical Domains Framework. This will give us a sense of issues, e.g. processes, and produce a provisional list of target behaviours and barriers to implementation<br/><i>Feed this information into stage 2a</i></p> | <p><b>STAGE 2a: Hybrid Model 1</b><br/><i>Genomic testing service provision implementation research</i><br/>Interviews with key decision makers regarding service provision; identify key areas for development of service provision planning<br/><i>Genomic testing clinical processes and practice implementation research</i><br/>Interviews with non genetic clinical staff to tease out Experiences and changes to clinical roles/practice<br/>Impact of research resources; support<br/>Reason making; values driving decisions<br/>Development of <i>process maps</i>. At interviews explore non genetic clinical understanding of the process for genomic testing<br/><i>Synthesis of data</i> from stage 1 and 2a by expert resource group to use in focus groups<br/><b>Focus Groups:</b> Phase 1: <i>Identify/verify barriers/facilitator</i> to implementation with multidisciplinary focus groups. Phase 2: Multidisciplinary focus groups to <i>co-design interventions</i>; Address key barriers in existing sites<br/>Address the broader set of barriers to implementation in future clinical practice</p> | <p><b>STAGE 2b: Hybrid Model 2</b></p> <ol style="list-style-type: none"> <li>1) <b>Foundation intervention package designed</b></li> <li>2) Identify processes and target behaviours for change</li> <li>3) Barrier assessment</li> <li>4) Foundation plus tailored packages provided for key barriers             <ul style="list-style-type: none"> <li>• Different strategies for:                 <ul style="list-style-type: none"> <li>• Different clinical conditions</li> <li>• Different sites</li> <li>• Different roles</li> </ul> </li> </ul> </li> </ol> <ol style="list-style-type: none"> <li>1) Identify measures for assessing implementation effectiveness</li> <li>2) Test clinical intervention and implementation strategy</li> <li>3) Refining implementation strategy</li> </ol> | <p><b>Hybrid Model 2:</b> Simultaneous testing of a clinical intervention and an implementation/intervention strategy</p> | <p><b>Hybrid Model 3:</b> Testing an implementation/intervention strategy while observing/gathering information on the clinical intervention and related outcomes</p> <p><b>Stage 3: Hybrid Model 3</b></p> <ol style="list-style-type: none"> <li>1) Testing real world implementation strategy (e.g., RCT, stepped wedge trial)             <ul style="list-style-type: none"> <li>• Test implementation strategy vs. Comparison vs. Standard roll out?</li> <li>ii) Surveys, interviews and observation will be used to determine:                 <ul style="list-style-type: none"> <li>• Acceptability</li> <li>• Adoption</li> <li>• Appropriateness</li> <li>• Feasibility</li> <li>• Fidelity and Sustainability</li> </ul> </li> <li>iii) Cost effectiveness and cost benefit analysis for implementation costs</li> <li>iiii) Case audits to measure penetration</li> </ul> </li> </ol> <p>To inform state/national policy and decision making</p> |

|                            | Demonstration: 2014-2015                                                                                         | 2016-2018                                                                                                                                | 2017-2019                                                                                                                                                 | 2017-2019                                                                                                                                                                                                                                                                                                                                                                           | 2018-2020                                                                                                                                                                          |
|----------------------------|------------------------------------------------------------------------------------------------------------------|------------------------------------------------------------------------------------------------------------------------------------------|-----------------------------------------------------------------------------------------------------------------------------------------------------------|-------------------------------------------------------------------------------------------------------------------------------------------------------------------------------------------------------------------------------------------------------------------------------------------------------------------------------------------------------------------------------------|------------------------------------------------------------------------------------------------------------------------------------------------------------------------------------|
| <b>Maltese Genomics</b>    | Childhood Syndromes<br>Neuropathies<br>Hereditary Colorectal Cancer<br>Focal Epilepsy<br>Acute Myeloid Leukaemia | Complex care<br>Congenital deafness<br>Dilated cardiomyopathy<br>Immunology<br>Advanced solid cancers<br>Advanced lymphoma (non-Hodgkin) | Controlling superbugs<br>Bone marrow failure<br>Complex neurological and neurodegenerative diseases<br>KidGen Genetic kidney disease<br>Perinatal autopsy | <b>Rare Diseases:</b> Neuromuscular Disease Project<br>Mitochondrial Disorder Project<br>Neurodevelopmental Disability Project<br>Genetic Immunology Project<br>KidGen Collaborative Renal Genetics project<br><b>Cancer:</b> Actionable Targets in High Risk Acute Lymphoblastic Leukaemia<br>Targeted Treatment on Clinical Gene Panels<br>Managing Patient Risk- Paediatric /AYA | Cardiovascular Genetic Disorders<br>chrLDRANZ Interstitial and Diffuse Lung Disease in Children<br>Acute Care Genomic Testing<br>HIDDEN Renal Genetics<br>Genomic Autopsy Flagship |
| <b>Australian Genomics</b> |                                                                                                                  |                                                                                                                                          |                                                                                                                                                           |                                                                                                                                                                                                                                                                                                                                                                                     |                                                                                                                                                                                    |

Figure 1: Implementation Research Plan

108x60mm (300 x 300 DPI)

| Broad elements of complexity                                   | Principles of complexity                                                                                                                                         | Model or Framework used to understand and respond to complexity |
|----------------------------------------------------------------|------------------------------------------------------------------------------------------------------------------------------------------------------------------|-----------------------------------------------------------------|
| Clinical effectiveness versus implementation effectiveness     | <ul style="list-style-type: none"> <li>- Edge of chaos</li> <li>- Self-organisation</li> <li>- Emergence</li> <li>- Simple rules</li> <li>- Iteration</li> </ul> | Effectiveness-Implementation Hybrid Model                       |
| Policy decisions and service provision                         | <ul style="list-style-type: none"> <li>- Sub-optimal</li> <li>- Requisite variety</li> <li>- Interconnectivity and</li> </ul>                                    | TSCimpact Model                                                 |
| Individual level behaviour change in a complex adaptive system | <ul style="list-style-type: none"> <li>networks</li> <li>- Co-evolution</li> <li>- Nested systems</li> </ul>                                                     | Theoretical Domains Framework                                   |

*NB: The principles of complexity (column 2) overlap across all three broad elements of complexity (column 1). Using the proposed frameworks (column 3), we aim to understand the influence of, and interplay between, these principles across each broad element. More specifically, the effectiveness-implementation hybrid model is being applied to unpick the broad element of complexity related to clinical versus implementation effectiveness; the TSCimpact Model is being used to disentangle the broad element of complexity related to policy decisions and service provision; The TDF is being used to understand the broad element of complexity related to individual level behaviour change in a complex adaptive system.*

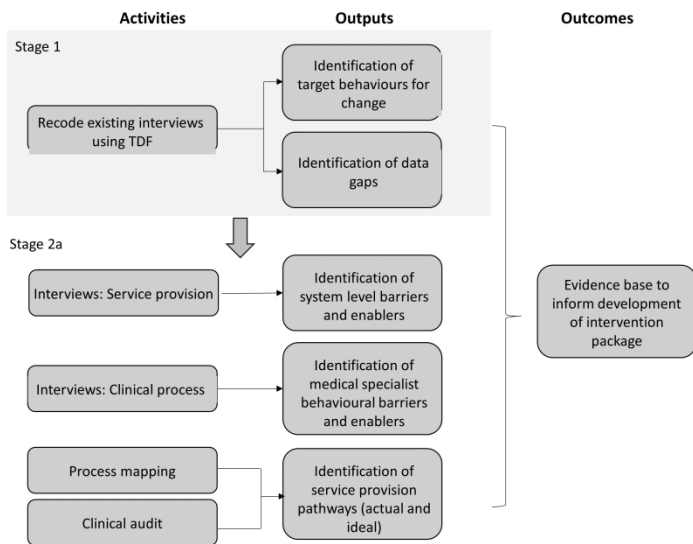

Figure 3: Logic Model

338x230mm (300 x 300 DPI)



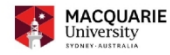

Implementation of Genomic Testing 2018

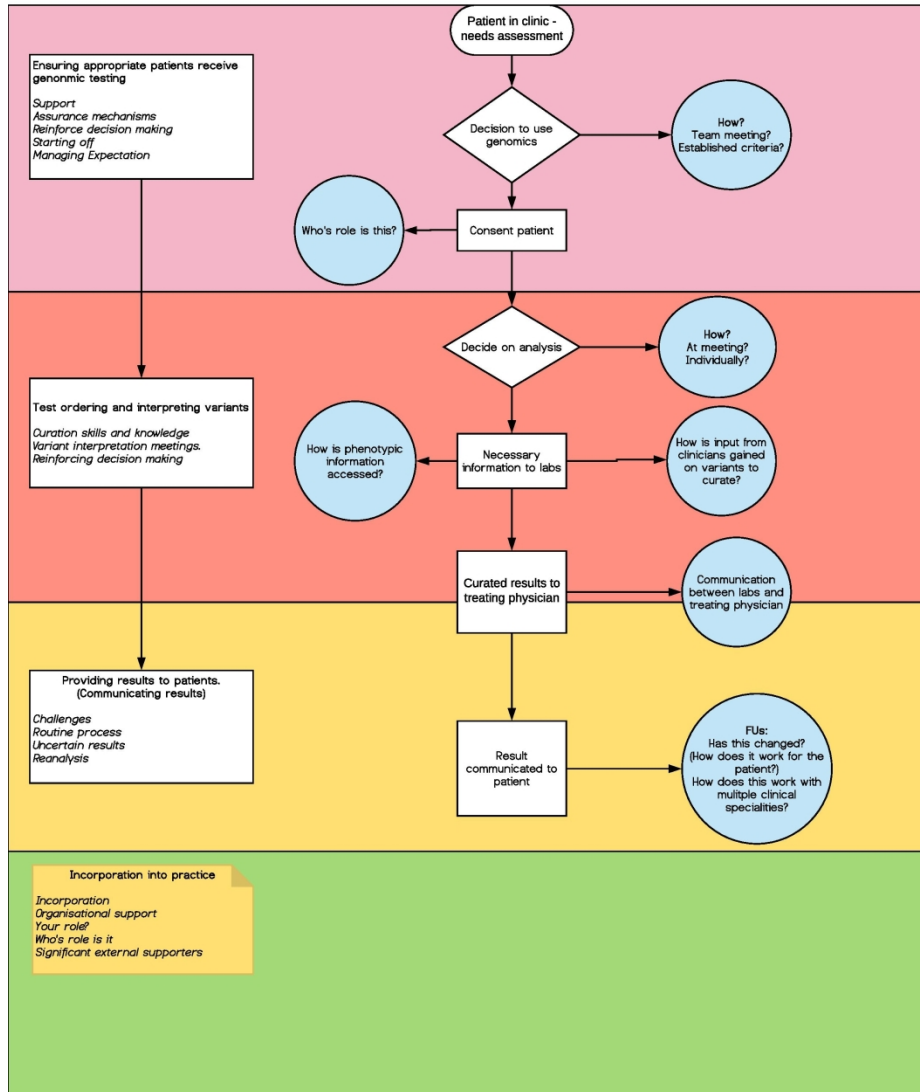

Figure 4: Process Mapping Guide

215x279mm (300 x 300 DPI)

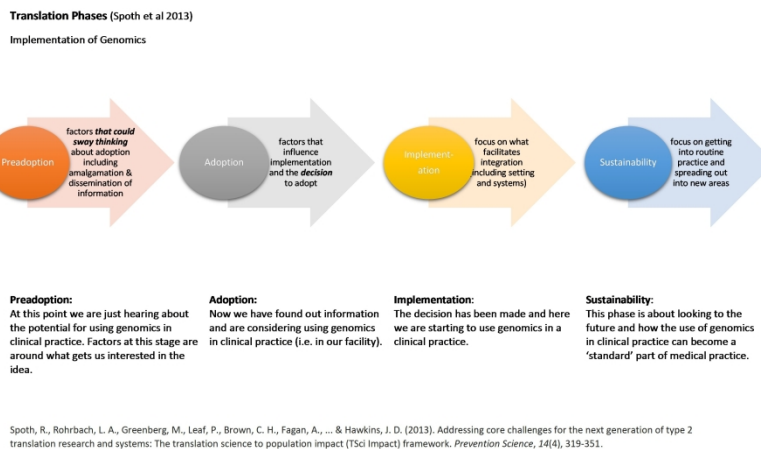

Figure 5: Service Provision Interview Translation Phases Graphic

338x190mm (300 x 300 DPI)

## Supplementary Files

Supplementary File 1: Stage 1 Evaluation Structured Interview Schedule

Supplementary File 2: Stage 2a, Semi Structured Interview Schedule, Clinical Processes

Supplementary File 3: Stage 2a, Semi Structured Interview Schedule Service Provision

Supplementary File 4: Co design guide for Focus Groups with hypothetical intervention mapping scenario

## Supplementary File 1: Stage 1 Evaluation Structured Interview Schedule

### Clinician Interviews – themes and questions

| Theme                                                                | Questions                                                                                                                                                                                                                                                                                                                                                                                                                                                                                                                                                                                                                                                                                                                                                                                                                                                                                                                                                                                                                                                                                                                                                                                                                                                                                                                             |
|----------------------------------------------------------------------|---------------------------------------------------------------------------------------------------------------------------------------------------------------------------------------------------------------------------------------------------------------------------------------------------------------------------------------------------------------------------------------------------------------------------------------------------------------------------------------------------------------------------------------------------------------------------------------------------------------------------------------------------------------------------------------------------------------------------------------------------------------------------------------------------------------------------------------------------------------------------------------------------------------------------------------------------------------------------------------------------------------------------------------------------------------------------------------------------------------------------------------------------------------------------------------------------------------------------------------------------------------------------------------------------------------------------------------|
| <b>Experience of participating in the demonstration project</b>      | <ol style="list-style-type: none"> <li>1. Please tell me about your involvement in the demonstration project</li> <li>2. From your perspective, what was the purpose of the MDT? How clear was this to you at the beginning?</li> <li>3. Do you feel the MDT altered over time? How?</li> <li>4. What did you like about the MDTs?</li> <li>5. What do you think should be done differently?</li> <li>6. On a scale of 1-5 how satisfied were you with the MDTs? (5 very satisfied, 4 satisfied, 3 neither satisfied nor dissatisfied, 2 dissatisfied, 1 very dissatisfied)</li> <li>7. What do you think is important to discuss during pre-test counselling?</li> <li>8. Did you receive a research report on any of your patients? How many? What type? (1/2 nothing reported, 3 VUS, 4a, 4a/ 5)</li> <li>9. Were you involved in returning results to patients?<br/>9.1. If yes, How did you approach this?<br/><i>Be aware may differ for diff types of result (nothing found, 3 VUS, 4a or 4b, 5).</i></li> <li>10. Thinking about the sorts of results you usually communicate to patients, was there anything different about returning this sort of result?</li> <li>11. So if I were to ask you to rate the difficulty you'd say it was...<br/><i>More difficult, the same as, less difficult do you agree?'</i></li> </ol> |
| <b>Impact</b> (What has the impact been? How have results impacted?) | <ol style="list-style-type: none"> <li>12. What impact has participating in this project had on your (clinical) practice?</li> <li>13. What impact has participating in this project had on your understanding of genomics?</li> </ol>                                                                                                                                                                                                                                                                                                                                                                                                                                                                                                                                                                                                                                                                                                                                                                                                                                                                                                                                                                                                                                                                                                |

|                                                                                                                                                                                                                                                          |                                                                                                                                                                                                                                                                                                                                                                                                                                                                                                                                                                                                                                                                                                                                                                                                                                                                                                                                                                                                                                                                                                                                                                                                                                                                         |
|----------------------------------------------------------------------------------------------------------------------------------------------------------------------------------------------------------------------------------------------------------|-------------------------------------------------------------------------------------------------------------------------------------------------------------------------------------------------------------------------------------------------------------------------------------------------------------------------------------------------------------------------------------------------------------------------------------------------------------------------------------------------------------------------------------------------------------------------------------------------------------------------------------------------------------------------------------------------------------------------------------------------------------------------------------------------------------------------------------------------------------------------------------------------------------------------------------------------------------------------------------------------------------------------------------------------------------------------------------------------------------------------------------------------------------------------------------------------------------------------------------------------------------------------|
| <p>1<br/>2<br/>3<br/>4<br/>5<br/>6<br/>7<br/>8<br/>9<br/>10<br/>11<br/>12<br/>13<br/>14<br/>15<br/>16<br/>17<br/>18<br/>19<br/>20<br/>21<br/>22<br/>23<br/>24<br/>25<br/>26<br/>27<br/>28<br/>29<br/>30</p> <p><b>Integration in future practice</b></p> | <p>14. Putting issues of funding aside, would you use/support the use of clinical genomic sequencing if it were available in (your) practice?<br/>If yes – when is there value in using it<br/>If unsure/ no – tell us more about this.</p> <p>15. What do you anticipate the barriers to incorporating genomics into practice (<i>in your specialty</i>) might be and how could these be overcome? (<i>funding model, clinician time, support for clinicians to attend from clinical managers</i>)</p> <p>16. If genomic sequencing were to be offered in routine clinical practice, how do you think decisions would be made about</p> <p>16.1. when to use exome sequencing?<br/>16.2. interpretation of results<br/>16.3. which genes to analyse</p> <p>17. What did you think about the approach Melbourne Genomics took of excluding genes for unrelated adult onset conditions to minimise incidental findings? Do you think patients should have the choice to receive information about variants that show a future risk of disease unrelated to their condition?</p> <p>18. Given that new genes are being identified and VUS are being reclassified as more is known, who do you think should be responsible for initiating a re-analysis in the future?</p> |
| <p>31<br/>32<br/>33<br/>34<br/>35<br/>36<br/>37<br/>38<br/>39</p> <p><b>Resources to support integration</b></p>                                                                                                                                         | <p>19. For which of these stages do you think resources would be helpful?</p> <p>20. What information would need to be included?</p> <p>21. What other resources might be helpful?</p> <p>22. What are the advantages/disadvantages of an online portal?</p>                                                                                                                                                                                                                                                                                                                                                                                                                                                                                                                                                                                                                                                                                                                                                                                                                                                                                                                                                                                                            |
| <p>40<br/>41<br/>42<br/>43<br/>44<br/>45<br/>46<br/>47<br/>48<br/>49<br/>50<br/>51<br/>52<br/>53<br/>54<br/>55<br/>56<br/>57<br/>58<br/>59<br/>60</p> <p><b>Final messages</b></p>                                                                       | <p>23. From your involvement in the demonstration project, what are the 3 things you want your hospital to keep in mind as genomics is implemented in clinical practice?</p> <p>24. Is there anything else you want to make sure the Alliance of organisations takes into account?</p>                                                                                                                                                                                                                                                                                                                                                                                                                                                                                                                                                                                                                                                                                                                                                                                                                                                                                                                                                                                  |

## Supplementary File 2: Stage 2a, Semi Structured Interview Schedule, Clinical Processes

Could you tell me what your role is and how you have been involved with the use of genomics in the clinical setting?

|                                                                                                                                                                                                                                                                                               |                                                                            |
|-----------------------------------------------------------------------------------------------------------------------------------------------------------------------------------------------------------------------------------------------------------------------------------------------|----------------------------------------------------------------------------|
| <b>Ensuring appropriate patients receive exome sequencing</b><br>( <b>Emotion</b> , Reinforcement, Behavioural regulation)                                                                                                                                                                    | <b>Domain</b>                                                              |
| What measures are in place to assure yourself that you are selecting the appropriate patients?                                                                                                                                                                                                | Behavioural regulation                                                     |
| Is there anything in place that makes this process work well routinely?                                                                                                                                                                                                                       | Reinforcement                                                              |
| What were your experiences of starting off offering testing - how did you become more proficient? What helped (or would have helped)?<br>Have you always been comfortable offering genomic testing in your clinical practice?<br>What changed your mind?                                      | Skills, Beliefs about capabilities, Beliefs about consequences,<br>Emotion |
| What are your experiences of managing expectation?<br>How have you found this? What has made it easier?                                                                                                                                                                                       | Exploratory q from patient consultation<br>Emotion                         |
| <b>Test ordering and interpreting variants</b><br>( <b>Emotion</b> , Reinforcement)                                                                                                                                                                                                           | <b>Domain</b>                                                              |
| What do you see as your role in determining the pathogenicity of a variant and its clinical significance)? (Who's role is it, how do you feed in?)<br>What would you (or did you) need to participate in the curation process (if you feel this is part of your role)?                        | Skills and knowledge                                                       |
| There is a large focus on multidisciplinary variant interpretation meetings as a way of interpreting results. What works/doesn't work?<br>What interventions have been put in place to aid the way they work?<br>How would you find variant interpretation if these didn't exist?             | Reinforcement<br>Emotion                                                   |
| Final decision making around variant classification – is there a standard process in place?                                                                                                                                                                                                   | Reinforcement                                                              |
| <b>Providing results to patients. (Communicating results)</b><br>(Emotion, Goals, Optimism, <b>Reinforcement</b> , <b>Behavioural regulation</b> )                                                                                                                                            | <b>Domain</b>                                                              |
| Have there been (are you aware of) any issues around communicating results back to patients?<br><i>No</i> : What has been put in place to ensure it worked well?<br><i>Yes</i> : What has been challenging? What needs to be put in place to overcome this?                                   | Exploratory                                                                |
| Has a routine process been established?<br>How do you manage this?                                                                                                                                                                                                                            | MAD, Behavioural regulation                                                |
| When results are uncertain how do you feel about feeding this back to the patient?<br>How would you support a less experienced doctor with this?<br>What gives you confidence that this process is being handled well?                                                                        | Emotion<br>Optimism                                                        |
| Has a routine process been put in place for reanalysis of results?<br>How do you feel about this?                                                                                                                                                                                             | Reinforcement<br>Emotion                                                   |
| <b>Incorporation into practice</b><br>(Emotion, <b>Reinforcement</b> )                                                                                                                                                                                                                        | <b>Domain</b>                                                              |
| What do you feel should be put in place (if anything) to incorporate genomic testing into standard clinical practice?<br>How could this be facilitated? (is there anything other than funding) that is needed?<br>How do we support people to change (attitudes, behaviours, habits, skills)? | Reinforcement                                                              |
| Are you happy to play a role in mainstreaming genomics?                                                                                                                                                                                                                                       | Emotion                                                                    |
| What sort of role do you envisage?                                                                                                                                                                                                                                                            | Prof ID                                                                    |
| How do you keep up with the evolving evidence base?                                                                                                                                                                                                                                           | Skills, knowledge                                                          |
| Is your organisation supportive of adopting genomics in clinical practice? In what way?                                                                                                                                                                                                       | Organisational Knowledge                                                   |
| Is there anybody (or any role) outside your organisation who is key to ensuring mainstreaming?                                                                                                                                                                                                | Prof role, environmental context                                           |
| For others starting out now, what advice would you give – maybe what you did or wish you had known?                                                                                                                                                                                           |                                                                            |

Are there any other barriers, maybe one you have overcome, that we haven't discussed and you would like to share?

### Supplementary File 3. Interview Schedule, Service Provision

Could you tell me what your role is and how you have been involved with the use of genomics in the clinical setting?

**Pre-adoption:** focus on factors *that could sway thinking* about adoption including amalgamation & dissemination of information

What got you interested in the idea of genomic testing being used in clinical practice?

Where do you look for information around the use of clinical genomics?  
And where would you look for more?

How do you go about deciding what information, about adopting genomics, into clinical practice has value?  
Are there any networks that you find more helpful than others?

**Adoption:** focus on factors that influence implementation and the *decision* to adopt

What was the key reason for deciding to adopt/invest genomics in this clinical setting?

What specific data did you need or would like to see, to support the decision to use genomics?

What have been the key factors to influence (fellow) physicians to participate in the use of genomic testing?

**Implementation:** focus on what facilitates implementation (including setting and systems)

What do you think makes it easier for some clinical areas to implement genomic testing?

What do you think makes it easier for some organisations to implement genomic testing?

How do you know if implementation has been successful?

In developing your (organisational) processes, what have you learnt about what can be changed and what is essential?

What have been the best strategies to enhance participation/engagement? (with clinicians and non clinical staff)

**Sustainability:** focus on getting into routine practice and spreading out into new areas

As a (clinical) leader how do you nurture those who are advocating for change in genomics?

What do you feel should be done (if anything) to facilitate the incorporation of genomic testing?

How do you keep up with the evolving evidence base?

How do you go about deciding what to disinvest in to bring in a new intervention

Do you feel you have a particular part to play in getting genomics incorporated into routine practice?

Who should facilitate mainstreaming?

What organisation and community influences would support greater sustainability?

How do you think genomic sequencing needs to be financed in the future to ensure sustainability?

What national and/or state networks can most effectively support sustainability?

What policies do you/would you find most helpful to support stable funding streams?

For others starting out now, what advice would you give – maybe what you did or wish you had known

Are there any other barriers, maybe one you have overcome, that we haven't discussed and you would like to share?

Supplementary File 4: Co design guide for Focus Groups

Clinical processes phase 1 focus group material 1

| Clinical processes target behaviour/area from process map and audit data | Barriers in context*^+       | TDF domain | Impact of barrier (high/moderate/low) | Ranking of barriers to target (1 being most important) |
|--------------------------------------------------------------------------|------------------------------|------------|---------------------------------------|--------------------------------------------------------|
| Target behaviour 1                                                       | Barrier from data synthesis  | XXX        |                                       |                                                        |
|                                                                          | Barrier from data synthesis  | XXX        |                                       |                                                        |
|                                                                          | Space for additional barrier |            |                                       |                                                        |
|                                                                          | Space for additional barrier |            |                                       |                                                        |

\*emerged from process mapping interviews ^emerged from clinical process interviews +emerged from service provision interviews  
 NB: XXX indicate where data would be populated. See 'hypothetical scenario below to follow the flow of data collection to intervention design'

Clinical processes phase 2 focus group material

| Clinical processes target behaviour/area from process map and audit data | Top barrier in context*^+ | TDF domain | Suggested intervention strategies*^+ | Behaviour change strategy represented | Likely impact of strategy (high/moderate/low) | Likely feasibility of strategy (difficult/possible) | Ranking of intervention strategy (1 being most favourable) |
|--------------------------------------------------------------------------|---------------------------|------------|--------------------------------------|---------------------------------------|-----------------------------------------------|-----------------------------------------------------|------------------------------------------------------------|
| Target behaviour 1                                                       | XXX                       |            | Ideas from data synthesis            | XXX                                   |                                               |                                                     |                                                            |
|                                                                          |                           |            | Ideas from data synthesis            | XXX                                   |                                               |                                                     |                                                            |
|                                                                          |                           |            | Space for more ideas                 |                                       |                                               |                                                     |                                                            |
|                                                                          |                           |            | Space for more ideas                 |                                       |                                               |                                                     |                                                            |

NB: XXX indicate where data would be populated. See 'hypothetical scenario below to follow the flow of data collection to intervention design'

## EXAMPLE HYPOTHETICAL INTERVENTION MAPPING SCENARIO: CLINICIANS

### Hypothetical flow from data collection to focus group

#### Target behaviour 1: Ensuring appropriate patients receive genomic testing

| Interviews/Process map                                                                                                                                                                                                                |                                                                                                                             | Focus Group                                                                                                          |                                                                                                            |                                                                                                                     |                                                                                                                                                                                                                                                                                                                                                  |
|---------------------------------------------------------------------------------------------------------------------------------------------------------------------------------------------------------------------------------------|-----------------------------------------------------------------------------------------------------------------------------|----------------------------------------------------------------------------------------------------------------------|------------------------------------------------------------------------------------------------------------|---------------------------------------------------------------------------------------------------------------------|--------------------------------------------------------------------------------------------------------------------------------------------------------------------------------------------------------------------------------------------------------------------------------------------------------------------------------------------------|
| Indicative hypothetical quote                                                                                                                                                                                                         | Theme & TDF domain                                                                                                          | Barrier                                                                                                              | Enabler                                                                                                    | BCT                                                                                                                 | Intervention                                                                                                                                                                                                                                                                                                                                     |
| <p>"Care is needed that you don't create an environment where you don't feel you have confidence as this transfers to the patients"</p> <p>"Having worked in the flagship you develop the 'patter' and ability to run the clinic"</p> | <p>Clinicians gaining confidence in their ability to do genomic testing</p> <p>TDF Domain<br/>Belief about capabilities</p> | <ul style="list-style-type: none"> <li>Lack of hands on experience</li> <li>Unable to attend MDT meetings</li> </ul> | <ul style="list-style-type: none"> <li>CG and GC support</li> <li>Access to flagship experience</li> </ul> | <p>Environmental changes</p> <p>Social processes of encouragement, pressure or support</p> <p>Framing/reframing</p> | <p>Ensuring clinicians have an opportunity (e.g., by quarantining time to attend) to learn skills through participation in multidisciplinary processes in the flagships (or processes that eventually replace flagships).</p> <p>Framing of the multidisciplinary meetings as 'hands on' learning to encourage support and shared expertise.</p> |



Service provision phase 1 focus group material 1

| Service provision/policy target behaviour/area | Barriers in context*^+       | TSCi area | TDF domain | Impact of barrier (high/moderate/low) | Ranking of barriers to target (1 being most important) |
|------------------------------------------------|------------------------------|-----------|------------|---------------------------------------|--------------------------------------------------------|
| Target behaviour X                             | Barrier from data synthesis  |           | XXX        |                                       |                                                        |
|                                                | Barrier from data synthesis  |           | XXX        |                                       |                                                        |
|                                                | Space for additional barrier |           |            |                                       |                                                        |
|                                                | Space for additional barrier |           |            |                                       |                                                        |

\*emerged from process mapping interviews ^emerged from clinical process interviews +emerged from service provision interviews  
 NB: XXX indicate where data would be populated. See 'hypothetical scenario below to follow the flow of data collection to intervention design'

Service provision phase 2 focus group material

| Service provision/policy target behaviour/area | Top barrier in context*^+ | TDF domain | Suggested intervention strategies*^+ | Behaviour change strategy represented | Likely impact of strategy (high/moderate/low) | Likely feasibility of strategy (difficult/possible) | Ranking of intervention strategy (1 being most favourable) |
|------------------------------------------------|---------------------------|------------|--------------------------------------|---------------------------------------|-----------------------------------------------|-----------------------------------------------------|------------------------------------------------------------|
| Target behaviour X                             | XXX                       |            | Ideas from data synthesis            | XXX                                   |                                               |                                                     |                                                            |
|                                                |                           |            | Ideas from data synthesis            | XXX                                   |                                               |                                                     |                                                            |
|                                                |                           |            | Space for more ideas                 |                                       |                                               |                                                     |                                                            |
|                                                |                           |            | Space for more ideas                 |                                       |                                               |                                                     |                                                            |

NB: XXX indicate where data would be populated. See 'hypothetical scenario below to follow the flow of data collection to intervention design'

**EXAMPLE HYPOTHETICAL INTERVENTION MAPPING SCENARIO: SERVICE PROVISION****Translation Phase 1: Preadoption**

| Interviews                                                                                                                                                      |                                                                                                                                            | Focus Group                                                                                                                                                                                      |                                                                                                                                               |                                                                                                                                                                                                                                |                                                                                                                                                                                                                                                                                                                                     |
|-----------------------------------------------------------------------------------------------------------------------------------------------------------------|--------------------------------------------------------------------------------------------------------------------------------------------|--------------------------------------------------------------------------------------------------------------------------------------------------------------------------------------------------|-----------------------------------------------------------------------------------------------------------------------------------------------|--------------------------------------------------------------------------------------------------------------------------------------------------------------------------------------------------------------------------------|-------------------------------------------------------------------------------------------------------------------------------------------------------------------------------------------------------------------------------------------------------------------------------------------------------------------------------------|
| <i>Indicative hypothetical quote</i>                                                                                                                            | <i>Theme &amp; TDF domain</i>                                                                                                              | <i>Barrier</i>                                                                                                                                                                                   | <i>Enabler</i>                                                                                                                                | <i>BCT</i>                                                                                                                                                                                                                     | <i>Intervention</i>                                                                                                                                                                                                                                                                                                                 |
| <p>“Less academic hospitals see genomics as the future rather than current practice”</p> <p>“Cost is secondary, hospital X has genomics, so we want it too”</p> | <p>Need for organisational knowledge</p> <p><i>TDF Domains</i></p> <p>Professional identity</p> <p>Environmental context and resources</p> | <ul style="list-style-type: none"> <li>Understanding that genomics is only for research (or has clinical application)</li> <li>Lack of integration of genomics into clinical practice</li> </ul> | <ul style="list-style-type: none"> <li>Organisational reputation</li> <li>Costs of genomics aligning with ‘traditional’ procedures</li> </ul> | <ul style="list-style-type: none"> <li>Social reward</li> <li>Framing/ reframing</li> <li>Goal setting (outcome)</li> <li>Goal setting (behaviour)</li> <li>Information about social and environmental consequences</li> </ul> | <ul style="list-style-type: none"> <li>Frame genomics as current best practice to hospital executive and clinicians</li> <li>Articulate a goal and strategy for implementing genomics at the hospital</li> <li>Provide information about genomics and benefits that patients at other hospitals have from using genomics</li> </ul> |
